# Supplementary material for: MtDNA analysis of global populations support that major population expansions began before Neolithic Time
Source: PubMed Central journal article supplement — Sci Rep. 2012 Oct 18;2:745. doi: 10.1038/srep00745 (PMC3475341; doi:10.1038/srep00745), 2012-10-18
Supplement: srep00745-s1.pdf [file srep00745-s1.pdf]

# **MtDNA analysis of global populations support that major population expansions began before Neolithic Time**

*Hong-Xiang Zheng<sup>1</sup>, Shi Yan<sup>1,2,3</sup>, Zhen-Dong Qin<sup>1</sup>, Li Jin<sup>1,2,3</sup>*

<sup>1</sup> MOE Key Laboratory of Contemporary Anthropology and Center for Evolutionary Biology, School of Life Sciences and Institutes of Biomedical Sciences, Fudan University

<sup>2</sup> Chinese Academy of Sciences and Max-Planck Society (CAS-MPG) Partner Institute for Computational Biology, Shanghai Institutes for Biological Sciences, Chinese Academy of Sciences, Shanghai 200031, China

<sup>3</sup> Key Laboratory of Computational Biology, CAS-MPG Partner Institute for Computational Biology, Chinese Academy of Sciences, Shanghai 200031, China

Correspondence and reprint request should be sent to Li Jin ([lijin.fudan@gmail.com](mailto:lijin.fudan@gmail.com))

Table S1 Haplogroup frequencies in the three African populations

Table S2. Age estimations of each cluster with distinct expansion in Africans, Europeans and Americans

Table S3 Haplogroup frequencies in the five European populations

Table S4 Haplogroup frequencies in the three American populations

Table S5 910 mtDNA haplotypes compared to rCRS

Figure S1 Non-metric multidimensional scaling of mtDNA  $\Phi_{ST}$  distances

**Table S1 Haplogroup frequencies in the three African populations**

| Haplogroup | ASW<br>n=61 | LWK<br>n=116 | YRI<br>n=136 | Total<br>n=313 |
|------------|-------------|--------------|--------------|----------------|
| L0a'b      | 0.00        | 1.72         | 0.00         | 0.64           |
| L0a        | 9.84        | 13.79        | 5.15         | 9.27           |
| L0f        | 0.00        | 1.72         | 0.00         | 0.64           |
| L1b        | 13.11       | 3.45         | 12.50        | 9.27           |
| L1c        | 9.84        | 2.59         | 2.21         | 3.83           |
| L2-6       | 0.00        | 4.31         | 0.00         | 1.60           |
| L2a        | 18.03       | 13.79        | 22.06        | 18.21          |
| L2b        | 1.64        | 0.86         | 7.35         | 3.83           |
| L2c        | 3.28        | 0.00         | 2.21         | 1.60           |
| L2e        | 0.00        | 0.00         | 2.21         | 0.96           |
| L3a        | 0.00        | 0.86         | 0.00         | 0.32           |
| L3b        | 0.00        | 27.59        | 11.03        | 15.02          |
| L3d1-5     | 8.20        | 1.72         | 5.15         | 4.47           |
| L3e        | 22.95       | 6.90         | 23.53        | 17.25          |
| L3f        | 1.64        | 0.00         | 4.41         | 2.24           |
| L3h        | 1.64        | 4.31         | 0.00         | 1.92           |
| L3i        | 0.00        | 0.86         | 0.00         | 0.32           |
| L3j        | 0.00        | 0.86         | 0.00         | 0.32           |
| L3k        | 1.64        | 0.00         | 0.00         | 0.32           |
| L3x        | 0.00        | 1.72         | 0.00         | 0.64           |
| L4         | 0.00        | 7.76         | 1.47         | 3.51           |
| L5         | 0.00        | 5.17         | 0.00         | 1.92           |
| M32        | 1.64        | 0.00         | 0.00         | 0.32           |
| C1         | 1.64        | 0.00         | 0.00         | 0.32           |
| D1         | 1.64        | 0.00         | 0.00         | 0.32           |
| U6         | 1.64        | 0.00         | 0.74         | 0.64           |
| A2         | 1.64        | 0.00         | 0.00         | 0.32           |

**Table S2. Age estimations of each cluster with distinct expansion in Africans, Europeans and Americans**

| Continent | lineage | <i>n</i>         | $\rho$ method with Soares complete genome rate <sup>a</sup> | $\rho$ method with Soares synonymous rate <sup>b</sup> | $\rho$ method with modified Mishmar coding region rate <sup>c</sup> | Bayesian MCMC by BEAST with Ho and Endicott rate <sup>d</sup> | Bayesian MCMC by BEAST with Atkinson rate <sup>e</sup> |
|-----------|---------|------------------|-------------------------------------------------------------|--------------------------------------------------------|---------------------------------------------------------------------|---------------------------------------------------------------|--------------------------------------------------------|
|           |         |                  | T(kya) $\pm$ $\sigma$ (ky)                                  | T(kya) $\pm$ $\sigma$ (ky)                             | T(kya) $\pm$ $\sigma$ (ky)                                          | T(95%CI)(ky)                                                  | T(95%CI)(ky)                                           |
| Africa    | L0a1a2  | 8                | 7.21 $\pm$ 2.54                                             | 4.92 $\pm$ 2.20                                        | 6.33 $\pm$ 1.91                                                     | 8.02 (3.90, 13.09 )                                           | 9.67 (5.13, 15.28 )                                    |
|           | L0a1a   | 15               | 15.04 $\pm$ 4.40                                            | 4.72 $\pm$ 1.57                                        | 11.37 $\pm$ 3.14                                                    | 15.13 (9.21, 20.89 )                                          | 17.94 (11.68, 23.55 )                                  |
|           | L1b1a3  | 11               | 11.35 $\pm$ 2.95                                            | 12.16 $\pm$ 3.57                                       | 12.57 $\pm$ 2.77                                                    | 16.62 (11.01, 22.71 )                                         | 19.69 (13.76, 25.93 )                                  |
|           | L1b1a   | 27               | 14.4 $\pm$ 3.15                                             | 14.57 $\pm$ 3.84                                       | 14.17 $\pm$ 2.66                                                    | 17.08 (11.64, 23.03 )                                         | 20.26 (14.62, 26.16 )                                  |
|           | L2a1a   | 10               | 11.43 $\pm$ 2.72                                            | 14.95 $\pm$ 5.28                                       | 13.83 $\pm$ 3.51                                                    | 10.24 (5.25, 15.82 )                                          | 12.48 (7.12, 18.81 )                                   |
|           | L2a1c   | 12               | 19.72 $\pm$ 2.93                                            | 20.99 $\pm$ 4.82                                       | 22.66 $\pm$ 3.62                                                    | 17 (12.04, 22.39 )                                            | 20.36 (15.45, 25.57 )                                  |
|           | L2a1f   | 9                | 9.09 $\pm$ 2.26                                             | 7.87 $\pm$ 2.62                                        | 9.73 $\pm$ 2.23                                                     | 10.65 (4.88, 17.19 )                                          | 12.81 (6.52, 19.64 )                                   |
|           | L2a1    | 49               | 21.89 $\pm$ 3.12                                            | 23.45 $\pm$ 4.12                                       | 24.08 $\pm$ 3.19                                                    | 23.18 (16.04, 31.25 )                                         | 27.81 (20.71, 35.51 )                                  |
|           | L3b1a1  | 32               | 3.97 $\pm$ 2.05                                             | 1.96 $\pm$ 0.92                                        | 2.73 $\pm$ 0.72                                                     | 8.84 (4.99, 13.16 )                                           | 10.73 (6.69, 15.39 )                                   |
|           | L3b1a   | 44               | 12.42 $\pm$ 3.51                                            | 16.81 $\pm$ 8.31                                       | 15.71 $\pm$ 4.97                                                    | 18.14 (12.97, 24.15 )                                         | 21.83 (16.9, 27.78 )                                   |
|           | L3e1    | 11               | 14.89 $\pm$ 2.76                                            | 22.18 $\pm$ 5.30                                       | 18.85 $\pm$ 3.77                                                    | 16.66 (11.3, 22.64 )                                          | 19.62 (14.04, 25.70 )                                  |
|           | L3e2a1b | 8                | 10.26 $\pm$ 3.04                                            | 7.87 $\pm$ 2.78                                        | 7.49 $\pm$ 2.23                                                     | 8.25 (4.07, 13.59 )                                           | 9.99 (5.29, 15.78 )                                    |
|           | L3e2a   | 14               | 13.76 $\pm$ 3.10                                            | 14.61 $\pm$ 5.15                                       | 13.50 $\pm$ 3.30                                                    | 14.06 (7.96, 20.01 )                                          | 16.64 (10.27, 22.32 )                                  |
|           | L3e2b   | 19               | 13.81 $\pm$ 2.29                                            | 13.25 $\pm$ 3.26                                       | 16.74 $\pm$ 2.71                                                    | 24.68 (14.5, 37.35 )                                          | 29.38 (18.23, 42.74 )                                  |
|           | L3e3b   | 8                | 6.88 $\pm$ 1.69                                             | 6.88 $\pm$ 2.60                                        | 8.06 $\pm$ 2.30                                                     | 9.72 (4.98, 15.359 )                                          | 11.43 (6.24, 18.12 )                                   |
| L3d1-5    | 14      | 25.85 $\pm$ 3.25 | 35.98 $\pm$ 6.26                                            | 32.59 $\pm$ 4.43                                       | 26.41 (17.07, 36.62 )                                               | 31.88 (22.04, 42.05 )                                         |                                                        |
| Europe    | H1      | 70               | 11.90 $\pm$ 1.63                                            | 10.00 $\pm$ 1.73                                       | 11.06 $\pm$ 1.63                                                    | 13.91 (10.27, 18.09 )                                         | 16.53 (13.46, 20.05 )                                  |
|           | H3      | 20               | 10.74 $\pm$ 1.71                                            | 10.23 $\pm$ 2.22                                       | 11.29 $\pm$ 1.88                                                    | 15.84 (10.94, 21.23 )                                         | 19.13 (14.27, 24.52 )                                  |
|           | HV      | 204              | 21.66 $\pm$ 4.11                                            | 22.22 $\pm$ 7.25                                       | 25.91 $\pm$ 6.2                                                     | 23.39 (15.30, 32.95 )                                         | 28.28 (19.99, 37.95 )                                  |

|         |              |             |             |              |                      |                       |                       |
|---------|--------------|-------------|-------------|--------------|----------------------|-----------------------|-----------------------|
|         | H            | 184         | 16.35 ±1.70 | 15.40 ±1.57  | 17.76 ±2.14          | 17.78 (12.67, 23.83 ) | 21.52 (16.91, 27.10 ) |
|         | J1c3         | 7           | 12.18 ±2.99 | 7.87 ±2.97   | 9.87 ±2.55           | 9.31 (5.64, 13.21 )   | 11.03 (7.17, 15.14 )  |
|         | J1c          | 25          | 16.96 ±4.00 | 8.18 ±2.04   | 13.27 ±2.24          | 13.32 (9.72, 17.29 )  | 15.81 (12.57, 19.36 ) |
|         | K1           | 18          | 21.24 ±3.64 | 24.05 ±4.85  | 24.33 ±3.68          | 14.46 (10.61, 18.79 ) | 17.37 (13.96, 21.24 ) |
|         | T1           | 8           | 13.02 ±3.25 | 15.74 ±4.82  | 13.83 ±3.36          | 12.54 (8.51, 16.83 )  | 14.86 (10.58, 18.75 ) |
|         | T2b          | 17          | 9.64 ±1.80  | 9.26 ±2.85   | 9.49 ±2.04           | 10.8 (7.21, 14.43 )   | 12.71 (9.38, 15.98 )  |
|         | T2           | 28          | 19.52 ±3.71 | 19.39 ±5.41  | 20.41 ±4.41          | 14.38 (10.60, 18.63 ) | 17.14 (13.95, 20.68 ) |
|         | U2'3'4'7'8'9 | 46          | 51.51 ±6.93 | 63.31 ±11.40 | 59.02 ±8.25          | 37.46 (27.76, 48.16 ) | 45 (36.90, 53.29 )    |
|         | U5a1         | 15          | 16.17 ±3.05 | 13.12 ±3.44  | 19.05 ±3.81          | 13.26 (9.65, 17.33 )  | 15.82 (12.37, 19.40 ) |
|         | U5a          | 26          | 21.22 ±3.66 | 16.95 ±3.05  | 22.34 ±3.86          | 16.84 (11.35, 23.12 ) | 20.14 (15.01, 26.33 ) |
|         | V            | 10          | 10.06 ±2.77 | 4.72 ±1.92   | 10.14 ±3.51          | 9.64 (5.67, 13.97 )   | 11.38 (7.19, 15.85 )  |
| W       | 13           | 21.44 ±4.12 | 23.61 ±6.54 | 21.63 ±4.69  | 13.94 (9.78, 18.65 ) | 16.76 (12.63, 21.35 ) |                       |
| America | A2           | 69          | 16.58 ±2.71 | 16.88 ±2.77  | 16.56 ±2.20          | 16.14 (11.19, 21.80 ) | 19.19 (14.69, 24.58 ) |
|         | A2w          | 15          | 6.10 ±1.27  | 7.34 ±2.34   | 7.99 ±1.89           | 11.99 (9.03, 15.43 )  | 14.33 (11.93, 16.86 ) |
|         | B2           | 44          | 18.62 ±3.42 | 13.77 ±4.20  | 21.05 ±5.08          | 15.7 (10.39, 22.28 )  | 18.58 (13.39, 25.41 ) |
|         | B2d          | 21          | 4.08 ±1.33  | 2.99 ±1.49   | 5.70 ±2.19           | 5.25 (1.61, 10.41 )   | 6.32 (2.11, 12.82 )   |
|         | C1           | 25          | 17.87 ±3.76 | 18.57 ±5.78  | 18.07 ±4.11          | 14.75 (10.2, 19.89 )  | 17.59 (13.44, 22.64 ) |
|         | D1           | 10          | 19.29 ±2.64 | 19.68 ±3.93  | 19.82 ±3.09          | 13.77 (9.49, 18.63 )  | 16.43 (12.49, 21.35 ) |

<sup>a</sup> Coalescence time were estimated based on  $\rho$  statistics with Soares complete genome rate, <sup>b</sup> on  $\rho$  statistics with Soares synonymous rate, <sup>c</sup> on  $\rho$  statistics with modified Mishmar coding region rate, <sup>d</sup> using Bayesian MCMC method by BEAST with Ho and Endicott rate, <sup>e</sup> using Bayesian MCMC method by BEAST with Atkinson rate. *n* indicates number of sequence.

**Table S3 Haplogroup frequencies in the five European populations**

|    | CEU<br>n=103 | FIN<br>n=97 | GBR<br>n=94 | TSI<br>n=105 | IBS<br>n=14 | Total<br>n=413 |
|----|--------------|-------------|-------------|--------------|-------------|----------------|
| HV | 3.88         | 1.03        | 0.00        | 3.81         | 7.14        | 2.42           |
| H  | 28.16        | 14.43       | 20.21       | 28.57        | 21.43       | 23.00          |
| H1 | 16.50        | 19.59       | 13.83       | 17.14        | 14.29       | 16.71          |
| H3 | 4.85         | 2.06        | 9.57        | 1.90         | 14.29       | 4.84           |
| V  | 2.91         | 4.12        | 0.00        | 1.90         | 7.14        | 2.42           |
| J  | 7.77         | 8.25        | 10.64       | 7.62         | 7.14        | 8.47           |
| T  | 9.71         | 3.09        | 9.57        | 11.43        | 14.29       | 8.72           |
| I  | 0.97         | 2.06        | 3.19        | 0.00         | 0.00        | 1.45           |
| W  | 4.85         | 2.06        | 2.13        | 3.81         | 0.00        | 3.15           |
| X2 | 0.00         | 1.03        | 5.32        | 0.95         | 0.00        | 1.69           |
| U1 | 0.00         | 0.00        | 0.00        | 0.95         | 7.14        | 0.48           |
| U2 | 1.94         | 0.00        | 0.00        | 0.95         | 0.00        | 0.73           |
| U3 | 0.97         | 1.03        | 0.00        | 0.00         | 0.00        | 0.48           |
| U4 | 1.94         | 5.15        | 5.32        | 0.95         | 0.00        | 3.15           |
| U5 | 12.62        | 28.87       | 13.83       | 7.62         | 0.00        | 15.01          |
| U7 | 0.00         | 0.00        | 0.00        | 0.95         | 0.00        | 0.24           |
| U8 | 0.00         | 1.03        | 1.06        | 0.95         | 0.00        | 0.73           |
| K1 | 1.94         | 6.19        | 1.06        | 7.62         | 7.14        | 4.36           |
| K2 | 0.97         | 0.00        | 4.26        | 0.95         | 0.00        | 1.45           |
| L1 | 0.00         | 0.00        | 0.00        | 0.95         | 0.00        | 0.24           |
| D4 | 0.00         | 0.00        | 0.00        | 0.95         | 0.00        | 0.24           |

**Table S4 Haplogroup frequencies in the three American populations**

|           | PUR<br>n=55 | CLM<br>n=62 | MXL<br>n=67 | Total<br>n=184 |
|-----------|-------------|-------------|-------------|----------------|
| A2        | 36.36       | 38.71       | 37.31       | 37.50          |
| B2        | 7.27        | 43.55       | 19.40       | 23.91          |
| C1        | 23.64       | 3.23        | 14.93       | 13.59          |
| D1        | 0.00        | 1.61        | 13.43       | 5.43           |
| D4        | 0.00        | 1.61        | 0.00        | 0.54           |
| L(ex M,N) | 16.36       | 8.06        | 0.00        | 7.61           |
| M1        | 0.00        | 1.61        | 0.00        | 0.54           |
| H         | 3.64        | 1.61        | 8.96        | 4.89           |
| V         | 0.00        | 0.00        | 1.49        | 0.54           |
| U         | 7.27        | 0.00        | 2.99        | 3.26           |
| J         | 5.45        | 0.00        | 0.00        | 1.63           |
| W         | 0.00        | 0.00        | 1.49        | 0.54           |

**Table S5 910 mtDNA haplotypes compared to rCRS**

|         |                                                                                                                                                                                                                                                                                                                                                                     |
|---------|---------------------------------------------------------------------------------------------------------------------------------------------------------------------------------------------------------------------------------------------------------------------------------------------------------------------------------------------------------------------|
| HG00096 | T152C A263G 310insC A750G A1438G A4769G G8592A A8860G C10394T G14569N A15326G A15340G T16093N T16519C                                                                                                                                                                                                                                                               |
| HG00097 | A73G T195C A263G G709A A750G A1438G G1888A A2706G T4216C A4769G A4917G T5277C T5426C C6489A C7028T 8281delC 8282delC 8283delC 8284delC 8285delC 8286delT 8287delC 8288delT 8289delA G8697A A8860G T10463C A11251G G11719A A11812G G13368A A14233G C14766T G14905A C15028A G15043A A15326G C15452A A15607G G15928A T16126C 16183delA C16184A T16189C C16294T T16519C |
| HG00098 | A73G T195C C242T A263G C295T C462T T489C A750G A1438G T2158C A2706G G3010A A3981G T4216C A4769G G5460A C5463T T6911C C7028T G8269A G8557A A8860G A10398G A11251G G11719A G12007A A12612G G13708A T13879C C14766T A15326G C15452A C16069T T16126C G16145A T16172C C16192T C16222T C16261T                                                                            |
| HG00099 | A263G A750G A1438G G3010A A4769G T6620C A8860G A15326G G15553A A15776N T16519C                                                                                                                                                                                                                                                                                      |
| HG00100 | A73G A153G T195C G225A T226C A263G A750G A1438G G1719A A2706G A4769G G4820A A5496G T6221C C6371T C7028T C8393T A8860G A9468G G11719A C12705T G13708A A13966G T14470C C14766T A15326G G15927A T16189C C16223T C16278T T16519C                                                                                                                                        |
| HG00101 | A73G C150T G185A A263G C295T C462T T489C A750G A1438G A2706G G3010A T4216C A4769G C7028T A8860G G9055A G9755A A10398G A11251G G11719A A12612G G13708A C13934T C14766T T14798C A15326G C15452A C16069T T16126C                                                                                                                                                       |
| HG00102 | A263G A750G A1438G A4769G A8860G A11908G A15326G G15466A T15721C T16519C                                                                                                                                                                                                                                                                                            |
| HG00103 | A73G G185A A189G A263G C295T C462T T489C A750G A1438G A2706G G3010A T4216C G4491A A4769G A4829G C7028T A8860G A10398G A11251G G11719A A12612G G13708A C13934T C14766T T14798C A15326G C15367T C15452A C16069T T16126C G16390A                                                                                                                                       |
| HG00104 | A73G A263G A750G A1438G A2086N A2706G T3197C A4769G C7028T A8860G G9477A A9667G T11353C A11467G G11719A A12308G G12372A T13617C C14766T A14793G A15218G A15326G 16189delT C16256T C16270T C16291T A16399G                                                                                                                                                           |
| HG00106 | A73G T146C C150T T152C A263G C295T T489C A750G A1438G A2706G T4216C A4769G C5633T C7028T C7476T A8860G G10172A A10398G A11084G A11251G G11719A A12612G G13708A C14766T G15257A A15326G C15452A G15812A C16069T T16126C C16193T C16278T T16519C                                                                                                                      |
| HG00108 | A73G A153G T195C G225A T226C A263G A750G A1438G G1719A A2706G A4769G T6221C C6371T C7028T C8393T A8860G G11719A C12705T G13708A A13966G T14470C C14766T A15326G G15927A T16189C C16192T C16223T C16278T T16519C                                                                                                                                                     |
| HG00109 | A73G T195C A263G 303delC T310C G499A A750G A1438G A1811G A2706G T4646C A4769G T5999C A6047G C7028T C8818T A8860G C11332T A11467G                                                                                                                                                                                                                                    |

|         |                                                                                                                                                                                                                                                                                      |
|---------|--------------------------------------------------------------------------------------------------------------------------------------------------------------------------------------------------------------------------------------------------------------------------------------|
|         | G11719A A12308G G12372A C14620T A14687G C14766T A15326G T15693C<br>T16356C T16519C                                                                                                                                                                                                   |
| HG00110 | A263G A750G A1438G G3010A A4769G G5460A A8512G A8860G C14902T<br>A15326G T16519C                                                                                                                                                                                                     |
| HG00111 | A263G A750G A1438G G3010A A4769G G5460A A8860G A15326G A15817G<br>T16519C                                                                                                                                                                                                            |
| HG00112 | A263G C327T C456T A750G A1438G A4769G G5471A A8860G T12864C<br>A15326G T16304C                                                                                                                                                                                                       |
| HG00113 | A73G A153G T195C A263G A750G A1438G G1719A A2706G A4769G G4820A<br>A5496G T6221C C6371T C7028T C8393T A8860G A9468G G11719A C12705T<br>G13708A A13966G T14470C C14766T A15326G G15927A T16189N C16223T<br>C16278T T16519C                                                            |
| HG00114 | A73G C150T A263G A723G A750G 955insC A1438G C1721T A2706G T3197C<br>A3861G A4769G A5836G C7028T A7768G A8860G G9477A A10262G A11467G<br>G11719A A12308G G12372A A13017G T13617C A13637G T14182C C14766T<br>A15326G T16189C T16249C C16270T                                           |
| HG00116 | A73G C150T A263G A723G A750G 955insC A1438G C1721T A2706G T3197C<br>A3861G A4769G A5836G C7028T A7768G A8860G G9477A A10262G A11467G<br>G11719A A12308G G12372A A13017G T13617C A13637G T14182C C14766T<br>A15326G T16189C T16249C C16270T                                           |
| HG00117 | A73G G185A A188G A263G C295T C462T T489C 514delC 515delA A750G<br>A1438G G1503A A2706G G3010A T4216C A4769G C7028T A8860G A10398G<br>A11251G G11719A A12612G G13708A C14766T T14798C G15314A A15326G<br>C15452A C16069T T16126C C16366T G16390A T16519C                              |
| HG00118 | T152C A263G A750G A1438G A4769G T6776C A8860G T13404C C14125T<br>A15326G C16239G T16519C                                                                                                                                                                                             |
| HG00119 | A73G T152N T195C A263G G709A A750G A1438G G1888A A2706G T4216C<br>A4769G A4917G C7028T G8697A A8860G C8935T A9389G T9899C T10463C<br>A11251G G11719A C12633A G13368A C14766T G14905A A15326G C15452A<br>A15607G G15928A T16126C A16163G C16186T 16187delC T16189C C16294T<br>T16519C |
| HG00120 | A73G G185A G228A A263G C295T 310insC C462T T489C A750G A1438G<br>A2706G G3010A T4216C A4769G A5198G C7028T A8860G A10398G A11251G<br>G11719A A12612G G13708A C14766T T14798C A15326G C15452A C16069T<br>T16126C                                                                      |
| HG00121 | A73G C497T A750G T1189C A1438G A1811G A2706G A3480G T4622C A4769G<br>C6518T C7028T A8347T T8715C A8860G G9055A T9698C A10398G A10550G<br>T11299C A11467G T11485C G11719A G11914A A12308G G12372A C14167T<br>C14766T T14798C A15326G T16093C T16224C T16311C T16519C                  |
| HG00122 | A73G C150T A263G A723G A750G 955insC A1438G C1721T A2706G T3197C<br>A3861G A4769G A5836G C7028T A7768G A8860G G9477A A10262G A11467G<br>G11719A A12308G G12372A A13017G T13617C A13637G T14182C C14766T<br>A15326G T16124C T16189C C16192T T16249C C16270T                           |
| HG00123 | A263G T310N A8860G G9142A G11914A T12954C G14305A A15326G A16235G                                                                                                                                                                                                                    |



|         |                                                                                                                                                                                                                                                                                               |
|---------|-----------------------------------------------------------------------------------------------------------------------------------------------------------------------------------------------------------------------------------------------------------------------------------------------|
|         | C16291T C16292T G16319A                                                                                                                                                                                                                                                                       |
| HG00124 | A73G T146C T152C T199C T204C G207A T250C A263G T460C 567insC 573insC<br>A750G A1438G G1719A A2706G A4529T A4769G C7028T G8251A A8860G<br>G9438A T10034C T10238C A10398G G11719A G12501A C12705T C13056T<br>A13780G C14766T G15043A A15326G A15758G A15924G G16129A C16223T<br>G16391A T16519C |
| HG00125 | T152C A263G A750G A1438G G3010A A4769G G5460A A8860G G9489A<br>A15326G A15817G A16215G T16519C                                                                                                                                                                                                |
| HG00126 | A214G A263G A750G A1438G A4769G T5999C A8860G T10101C C10211T<br>A15326G T16519C                                                                                                                                                                                                              |
| HG00127 | A93G G6480A                                                                                                                                                                                                                                                                                   |
| HG00128 | A73G T146C A263G A723G A750G A1438G A1811G C2217T A2706G T2882C<br>A3480G T4452C A4769G G5231A C7028T A8860G G9055A T9698C T9716C<br>A10550G T11299C A11467G G11719A C11869A A12308G G12372A G13135A<br>A14037G C14167T C14766T T14798C A15326G G15949A T16126C T16224C<br>T16311C T16519C    |
| HG00129 | T152C A263G A750G A1438G A4769G T6776C A8860G A11590G A12217G<br>T14199N A14687G A15326G C16327N T16519C                                                                                                                                                                                      |
| HG00130 | A73G A153G T195C A263G A750G A1438G G1719A A2706G G3705A A4769G<br>T6221C C6371T C7028T T7741C C8393T A8860G T10454C G11719A C12705T<br>G13708A A13966G T14470C C14766T A15326G G15927A 16189delT C16223T<br>C16278T T16519C                                                                  |
| HG00131 | T152C A263G A6716G G16129A 16282insA                                                                                                                                                                                                                                                          |
| HG00133 | T196C A263G A750G A1438G A4769G T8412C A8860G A9545G T9909C<br>T11152C 12237delC G12651A T13500C A14013G A14203G G15110A A15326G                                                                                                                                                              |
| HG00134 | A263G 310insC C315T A750G A1438G G3010A A4769G A8860G T10101C<br>A15326G C16270T T16519C                                                                                                                                                                                                      |
| HG00135 | A73G A263G A750G A1438G G3010A A4769G A8860G A15326G A16051G<br>A16162G T16519C                                                                                                                                                                                                               |
| HG00136 | A73G A263G T310N G709A A750G G930A A1438G G1888A A2706G T4216C<br>A4769G A4917G G5147A C7028T C7397N G8697A A8860G T10463C A11251G<br>G11719A A11812G A12699G G13368A A14233G C14766T G14905A A15326G<br>C15452A A15607G G15928A T16126C C16294T C16296T T16304C T16519C                      |
| HG00137 | T146C A263G 514delC 515delA A750G A1438G A4769G A6419G T6776C T7159C<br>A8860G T11233C G12771A A15326G G16145A T16519C                                                                                                                                                                        |
| HG00138 | A263G 514delC 515delA A750G A1438G T1822C G3010A A3796G A4769G<br>A8860G A15326G T16189C T16356C T16362C T16519C                                                                                                                                                                              |
| HG00139 | T195C A263G A750G A1438G C3992T A4024G A4769G T5004C G8269A A8860G<br>G9123A A12642G C14365T G14569A A14582G A15326G G15884A                                                                                                                                                                  |
| HG00140 | T195C A263G A750G A1438G C3992T A4024G A4769G T5004C A7091G G8269A<br>A8860G G9123A A12642G C14365T G14569A A14582G A15326G G15884A                                                                                                                                                           |
| HG00141 | A73G A263G G709A A750G G930A A1438G G1888A A2706G T4216C A4769G<br>A4917G G5147A C7028T G7859A G8697A A8860G T10463C A11251G G11719A<br>A11812G G13368A A13681G G13928C A14233G C14766T G14905A A15326G                                                                                       |

|         |                                                                                                                                                                                                                                                                  |
|---------|------------------------------------------------------------------------------------------------------------------------------------------------------------------------------------------------------------------------------------------------------------------|
|         | C15452A A15607G G15928A T16126C C16248T C16294T C16296T T16304C T16519C                                                                                                                                                                                          |
| HG00142 | A73G A263G 514delC 515delA A750G A1438G A2706G T3197C A4769G C7028T A8860G G9477A A9667G A11467G G11719A A12308G G12372A T13617C C14766T A14793G A15218G A15326G C16256T A16399G                                                                                 |
| HG00143 | T195C A263G A750G A1438G T4135C T4204C A4769G T7334C A8860G A15326G C16218T T16519C                                                                                                                                                                              |
| HG00144 | A263G T310N A750G A1438G A4769G C5450A T6776C A8860G A15326G T16519C                                                                                                                                                                                             |
| HG00145 | A73G A263G 310insC A750G A1438G T1700C A2706G T3197C T3308C C4224T A4769G T5495C C7028T A8860G G9477A A11467G G11719A A12171G A12308G G12372A T13617C C14766T A14793G A15218G A15326G A15924G C16256T C16270T T16362C A16399G                                    |
| HG00146 | A73G A263G A750G A1438G A2706G T3197C A4769G C7028T A8860G G9477A A11467G G11719A A12308G G12372A T13617C A13827G G13928C C14766T A14793G A15326G C16114A C16192T C16256T C16270T C16294T G16526A                                                                |
| HG00147 | A73G A263G T310N A750G A1438G A2706G T3197C A4769G C7028T A8860G G9477A A11467G G11719A A12308G G12372A T13617C A13827G G13928C C14766T A14793G A15326G C16114A C16192T C16256T C16270T C16294T G16526A                                                          |
| HG00148 | A73G C150T A189G C194T T195C T204C G207A A263G G709A A750G T1243C A1438G A2706G A3505G A4769G G5046A G5460A C6528T C7028T G8251A A8860G G8994A A10097G C11674T G11719A A11947G T12414C C12705T C14766T A15326G A15775G G15884C C16223T C16292T T16362C T16519C   |
| HG00149 | A263G 310insC A750G A1438G C3333T A4769G A8860G A15326G A16293G T16519C                                                                                                                                                                                          |
| HG00150 | A263G T477C A750G A1438G G3010A A4769G A8860G A9150G A15326G T16263C T16519C                                                                                                                                                                                     |
| HG00151 | A263G A750G A1438G A4769G G5460A A8860G G11719A A15326G G16129A A16316G T16519C                                                                                                                                                                                  |
| HG00152 | A263G A750G A1438G G3010A A4769G A8713G A8860G A15326G T16519C                                                                                                                                                                                                   |
| HG00153 | A73G A263G A750G A1438G G3010A A4769G G5460A 5894insC A8860G A15326G A15817G T16519C                                                                                                                                                                             |
| HG00154 | A73G T199C T204C T250C A263G 514delC 515delA 573insN A750G A1438G G1719A A2706G A4529T A4769G C7028T G8251A G8519A A8860G C9851T T10034C T10238C A10398G A10819G G11719A G12501A C12705T A13780G C14766T G15043A A15326G A15924G G16129A C16223T G16391A T16519C |
| HG00155 | A73G T152C T195C C198T A263G G499A A750G A1438G A1811G A2706G T4646C A4769G T5999C A6047G C7028T T7705C A8860G T9530C C11332T T11339C A11467G G11719A C11788T A12308G G12372A A13528G C14620T C14766T T15514C T15693C A16051G T16356C T16519C                    |
| HG00156 | T195C A263G T310N A750G G1211A A1438G T3898N A4769G G6261A T6776C G7444A A8860G T12957C G14305A T14484C A15326G C16176T                                                                                                                                          |
| HG00158 | A73G A263G 310insC A750G A1438G G3010A A4769G G5460A 5894insC                                                                                                                                                                                                    |

|         |                                                                                                                                                                                                                                                          |
|---------|----------------------------------------------------------------------------------------------------------------------------------------------------------------------------------------------------------------------------------------------------------|
|         | A8860G A15326G A15817G T16519C                                                                                                                                                                                                                           |
| HG00159 | T152C A263G A750G A1438G G3010A A4769G A8860G T14034C A14981G A15326G T16189C T16519C                                                                                                                                                                    |
| HG00160 | A73G T146C T152C T195C A263G A750G A1438G A2706G T3197C A4769G C7028T A8860G G9477A G9548A G10685A A11467G G11719A T11984C G12372A T12519C A12654G A13285G T13617C C14766T A14793G A15326G C16256T C16270T G16526A                                       |
| HG00171 | T72C A263G T310N T485C A750G A1438G A2706G G4580A T4639C A4769G C5263T C7028T A8860G A8869G A15326G C15904T A16183G T16298C                                                                                                                              |
| HG00173 | A73G C150T T217C A263G T310N 573insC A750G A1438G A2706G T3197C A4769G A5656G C7028T A7768G A8860G G9477A A11467G G11719A A12308G G12372A G12618A T13617C T14182C C14766T A15326G T16189C C16192T C16270T                                                |
| HG00174 | A73G C150T T217C A263G 573insC A750G A1438G A2706G T3197C A4769G A5656G C7028T A7768G A8860G G9477A A11467G G11719A A12308G G12372A G12618A T13617C T14182C C14766T A15326G T16189C C16192T C16270T                                                      |
| HG00176 | A73G A263G T282C A750G A1438G A1811G A2706G C3738T A4769G A5240G T6392C C6455T C7028T A7055G A8860G A9338G C9365T T9698C G9777A C10733T A11467G G11719A C12135A A12308G G12372A G13145A C14766T A15326G A16146G T16342C                                  |
| HG00177 | A73G T146C T152C A263G 498delC A750G T1189C A1438G A1811G A2706G A3480G A4769G C7028T A8860G G9055A A9093G T9698C T9903C A10398G A10550G T11299C G11377A A11467G G11719A A12308G G12372A C14167T C14766T T14798C A15326G T16224C T16311C T16519C         |
| HG00178 | A263G G709A A750G A1438G C2259T A4745G A4769G G7337A A8842G A8860G T10101C T13326C C13680T C14872T A15326G C16261T T16311C                                                                                                                               |
| HG00179 | A263G A750G A1438G A4769G G6480A A8860G G9055A T14470A A15326G C16221T T16519C                                                                                                                                                                           |
| HG00180 | A73G A263G A750G T1187C A1438G G3010A A4769G A8271T A8860G A15326G A16162G T16519C                                                                                                                                                                       |
| HG00181 | A73G T195C A263G T310N G499A T629C A750G A1438G A1811G 2404insC A2706G C2772T T4646C A4769G A5984G T5999C A6047G C6938T C7028T T8260C A8860G C11332T A11467G G11719A A12308G G12372A C14620T C14766T A15326G T15693C T16356C T16519C                     |
| HG00182 | A263G A750G A1438G G3010A A4769G A8860G C9711N T14180C A15326G C16147T T16519C                                                                                                                                                                           |
| HG00183 | T199C A263G A750G A1438G A4769G T8843C A8860G G9039A G12192A A15326G T16519C                                                                                                                                                                             |
| HG00185 | A73G T146C T152C A263G 498delC A750G T1189C A1438G A1811G A2706G A3480G A4769G C7028T A8860G G9055A A9093G T9698C T9903C A10398G A10550G T11299C G11377A A11467G G11719A A12308G G12372A C14167T T14757C C14766T T14798C A15326G T16224C T16311C T16519C |
| HG00186 | A73G T195C A263G G499A T629C A750G A1438G A1811G 2404insC A2706G                                                                                                                                                                                         |

|         |                                                                                                                                                                                                                                                                                |
|---------|--------------------------------------------------------------------------------------------------------------------------------------------------------------------------------------------------------------------------------------------------------------------------------|
|         | C2772T T4646C A4769G A5319T A5984G T5999C A6047G C6938T C7028T T8260C A8860G T9541C C11332T A11467G G11719A A12308G G12372A C14620T C14766T A15326G T15693C T16356C T16519C                                                                                                    |
| HG00187 | A73G C150T T217C A263G 567insC A750G A1438G A2706G T3197C A3434G A4769G A5656G C7028T A7768G A8860G G9477A A11467G G11719A A12308G G12372A G12618A T13617C T14182C C14766T A15326G A15763N T16189C C16192T C16270T                                                             |
| HG00188 | A73G C150T A263G 573insC A750G A1438G A2706G T3197C A4769G A5656G C7028T A7385G A7768G A8860G G9477A T10927C A11467G G11719A A12308G G12372A G12618A T13617C T14182C C14766T A15326G T16144C T16189C C16270T                                                                   |
| HG00189 | A263G 456delC A750G A1438G G3010A T4452C A4769G T7309C A8860G A9066G A15326G T16093C A16182C A16183C T16189C T16519C                                                                                                                                                           |
| HG00190 | A93G A263G A750G A1438G G1719A C3613T A4769G A4793G G5417A T8022C A8860G G11016A A11167G T13896C A15326G C16261T T16304C T16519C                                                                                                                                               |
| HG00231 | A73G A189G C194T T195C T204C G207A A263G G709A A750G T1243C A1438G A2706G A3505G T3866C T4363C A4769G G5046A G5460A C6528T C7028T G8251A A8860G G8994A A10097G T10410C C11674T G11719A A11947G T12414C C12705T C14766T A15326G A15775G G15884C C16223T C16292T T16362C T16519C |
| HG00232 | A263G T310C A750G A1438G G3010A A4769G A8860G A15326G A16183C T16189C T16519C                                                                                                                                                                                                  |
| HG00233 | T195C A263G A750G A1438G A1842G A4769G A5568G G8206A A8860G T8870C C14872T A15326G 16258insC T16263C                                                                                                                                                                           |
| HG00234 | A73G A263G G709A A750G A1053G A1438G G1888A A2706G T2850C T4216C T4688C A4769G A4917G T7022C C7028T G8697A A8860G T10463C A11251G G11719A A11812G G13368A T13965C A14233G A14687G C14766T G14905A A15326G C15452A A15607G G15928A T16126C C16294T C16296T T16519C              |
| HG00235 | A73G G185A A188G G228A A263G C295T C462T T489C A750G A1438G A2706G G3010A T4216C A4769G C7028T A8860G A10398G A11251G G11719A A12612G G13708A C14766T T14798C A15326G C15452A A15947G C16069T T16126C A16240G T16519C                                                          |
| HG00236 | A73G T146C T152C A263G T310N G709A A750G A1438G A1811G A2706G A3480G T4561C A4769G C7028T A8860G G9055A T9698C T9716C A10550G T11299C A11467G G11719A A12308G G12372A C13293T C14167T C14766T T14798C A15326G T16224C T16311C T16519C                                          |
| HG00237 | A73G A263G G417A A750G A1438G A2581G A4769G T6776C A8860G A12447G A15326G G16129A T16519C                                                                                                                                                                                      |
| HG00238 | T55A A73G C150T A263G A750G A1438G A2706G T3197C A4769G A5656G C7028T A7768G A8860G G9477A A11467G G11719A A12308G G12372A T13617C T14182C C14420T T14470C C14766T T15191C A15326G T16189N C16270T T16311C G16336A                                                             |
| HG00239 | C151T T152C A263G T293C T310N A750G A1438G A4769G T6776C A8860G A15326G T16519C                                                                                                                                                                                                |

|         |                                                                                                                                                                                                                                                                                                             |
|---------|-------------------------------------------------------------------------------------------------------------------------------------------------------------------------------------------------------------------------------------------------------------------------------------------------------------|
| HG00240 | T55A A73G C150T A263G A750G A1438G A2706G T3197C A4769G A5656G C7028T A7768G A8860G G9477A A11467G G11719A A12308G G12372A T13617C T14182C C14420T T14470C C14766T T15191C A15326G T16189N C16270T T16311C G16336A                                                                                          |
| HG00242 | A73G C150T T152C A263G 310insC A750G A1438G C1721T A2706G T3197C A4732G A4769G T5918C C7028T A7768G A8860G G9477A A11467G G11719A A12308G G12372A T13617C A13637G T14182C G14323A C14766T A15326G T16189C T16325C                                                                                           |
| HG00243 | A73G T146C A263G A750G A1438G A1811G C2217T A2706G A3480G A4769G G5231A C7028T A8860G G9055A T9698C T9716C A10550G T11299C A11374G A11467G G11719A C11869A A12308G G12372A G13135A A14037G C14167T C14766T T14798C A15326G T16224C T16311C T16519C                                                          |
| HG00244 | A73G A153G T195C G225A T226C A263G A750G A1438G G1719A A2706G A4769G T6221C C6371T C7028T C8393T A8860G A10532G A10750G G11719A T12599C C12705T C13251T G13708A A13966G T14180C T14470C C14766T A15326G G15927A A16183C T16189C C16223T C16278T C16291T T16519C                                             |
| HG00245 | T152C A263G A750G A1438G C3992T T4418C A4769G T6776C A8860G G8950A A10754C A15326G T16519C                                                                                                                                                                                                                  |
| HG00246 | A73G A263G G709A A750G G930A A1438G G1888A A2706G T3826C T4216C A4769G A4917G G5147A C7028T G8697A A8860G T10463C A11251G G11719A A11812G G13368A A14233G C14766T G14905A A15326G C15452A A15607G G15928A T16126C T16172C C16294T C16296T T16304C T16519C                                                   |
| HG00247 | A73G T152C A263G G499A A750G A1438G A1811G A2706G T4646C A4769G A4917G T5999C A6047G C7028T C8818T A8860G G9145A C11332T A11467G G11719A A12308G G12372A G13708A T14180C C14620T C14766T A15326G T15693C T15718C A16051G C16147T T16356C T16519C                                                            |
| HG00249 | A263G T310C C456T A750G A1438G A4769G G5471A A8860G T10238C A15326G T16304C                                                                                                                                                                                                                                 |
| HG00250 | A73G T195C A263G G499A A750G A1438G A1811G A2706G A3672G T4646C A4769G A4976G T5999C A6047G C7028T T7705C A8860G A9115G C10557T C11143T G11176A C11332T T11339C A11467G G11719A A12308G G12372A T12609C G13708A C14620T C14766T A15326G C15632T T15693C T16093C T16356C T16519C                             |
| HG00251 | T152C A263G T310N A373G C456T A750G A1438G A4769G A8860G T13215A C14659T A15326G T16093C G16129N T16304C                                                                                                                                                                                                    |
| HG00252 | A263G A750G G1393A A1438G A4769G T6293C T6776C A8860G T10322C A15326G C16214T T16519C                                                                                                                                                                                                                       |
| HG00253 | A73G T199C G203A T204C T250C A263G 455insT 573insN A750G A1438G G1719A A2706G A3447G C3990T A4529T A4769G G6734A C7028T G8251A G8616T A8860G G9947A T10034C T10238C A10398G T10915C G11719A G12501A C12705T A13780G T14182C C14766T G15043A A15326G A15924G G16129A T16172C C16223T T16311C G16391A T16519C |
| HG00254 | A263G C456T A750G A1438G T4336C A4769G A8860G G11969A T14325C A15326G T16304C                                                                                                                                                                                                                               |

|         |                                                                                                                                                                                                                                                                                        |
|---------|----------------------------------------------------------------------------------------------------------------------------------------------------------------------------------------------------------------------------------------------------------------------------------------|
| HG00255 | A73G T195C A263G G499A A750G T1189C A1438G A1811G A2706G A3672G A3796G T4646C A4769G C5755N T5999C A6047G C7028T T7705C A8860G A10876G C11143T G11176A C11332T T11339C A11467G G11719A A11737G A12308G G12372A T12609C G13708A C14620T C14766T T15067C A15326G T15693C T16356C T16519C |
| HG00256 | T195C A263G T310C C327T C456T A750G A1438G A4769G G5471A A8860G T12864C A15326G T16304C                                                                                                                                                                                                |
| HG00257 | A73G G185A G228A A263G C295T T310N C462T T489C A750G A1438G A2706G G3010A T4216C A4769G C5755N C7028T A8860G T10084C A11251G G11719A A12612G G13708A C14766T T14798C A15326G C15452A C16069T T16126C G16319A                                                                           |
| HG00258 | A73G G185A A188G C198T G228A A263G C295T C462T T489C A750G A1438G A2706G G3010A T4216C A4769G C7028T C8558T A8860G A10398G A11251G G11719A A12612G A13557G G13708A C14766T T14798C A15326G C15452A C16069T T16126C T16519C                                                             |
| HG00259 | A73G T152C A263G T310N G709A A750G G930A A1438G G1888A A2706G T4216C A4769G A4917G G5147A C5755N C7028T G8697A A8860G A9254G T10463C A11251G G11719A A11812G G13368A A14233G C14766T G14905A A15326G C15452A A15607G G15928A T16126C C16294T T16304C T16519C                           |
| HG00260 | A73G C150T A263G T310N A750G A1438G C1721T A2706G T3197C C3212T A4732G A4769G C5755N C7028T A7768G A8860G G9477A A11467G G11719A A12308G G12372A T12678C T13617C A13637G T14182C C14766T A15326G G16129A T16189C C16192T C16270T T16304C G16398A                                       |
| HG00261 | A73G G185A A188G G228A A263G A272G C295T T310N C462T T489C A750G A1438G A2619G A2706G G3010A T4216C A4325G A4769G C5755N C7028T A8860G A10398G A11251G G11719A A11933T A12397G A12612G G13708A C13934T C14766T T14798C A15326G C15452A C16069T T16126C A16293C                         |
| HG00262 | A73G A263G G709A A750G G930A A1438G G1888A A2706G T4216C A4769G A4917G G5147A C7028T G8697A A8860G A10006N T10463C A11251G G11719A A11812G G13368A A14233G C14766T G14861A G14905A A15326G C15452A A15607G G15928A T16126C C16294T C16296T T16304C T16519C                             |
| HG00263 | A73G A263G T282C G709A A750G A1438G A1811G A2706G C3738T G4491A A4769G C5755N T6392C C6455T C7028T A7055G A8860G C9365T C9599T T9698C A11467G G11719A A12308G G12372A G13145A C14766T A15326G C16167T C16179T                                                                          |
| HG00264 | A263G 310insC C456T A750G A1438G A4769G T5302C A8860G A15326G T16304C T16311N G16391A                                                                                                                                                                                                  |
| HG00265 | A73G A263G 514delC 515delA G709A A750G G930A A1438G G1888A A2706G T4216C A4769G A4917G G5147A C7028T G8697A A8860G T10463C A11251G G11719A A11812G G13368A G13928C A14233G C14766T G14905A A15326G C15424T C15452A A15607G G15928A T16126C C16294T C16296T T16304C T16519C             |
| HG00266 | A263G 456delC A750G A1438G G3010A T4452C A4769G T7309C A8860G A9066G A15326G T16093C A16183C T16189C T16519C                                                                                                                                                                           |

|         |                                                                                                                                                                                                                                                  |
|---------|--------------------------------------------------------------------------------------------------------------------------------------------------------------------------------------------------------------------------------------------------|
| HG00267 | A73G T195C A263G T310C G499A A750G A1438G A1811G A2706G G3736A<br>T4646C A4769G T5999C A6047G C7028T C8818T A8860G C11332T A11467G<br>G11719A A12308G G12372A C14620T C14766T A15326G T15693C C16344T<br>T16356C T16362C T16519C                 |
| HG00268 | A73G A263G A750G A1438G A2706G T3197C A4769G C7028T A8860G G9477A<br>A11467G G11719A A12308G G12372A G12630A T13617C A13827G G13928C<br>C14766T A14793G A15326G C16114A C16192T C16256T C16270T T16271C<br>C16294T G16526A                       |
| HG00269 | A73G A263G A750G A1438G G3010A A4769G A8271T A8860G A15326G<br>A16162G T16519C                                                                                                                                                                   |
| HG00270 | A73G C150T A263G A750G A1438G A2706G T3197C A4769G A5656G C7028T<br>A7385G A7768G A8860G G9477A T10927C A11467G G11719A A12308G<br>G12372A G12618A T13617C T14182C C14766T A15326G T16144C T16189C<br>C16270T                                    |
| HG00271 | A73G C150T T217C A263G T310C 573insC A750G A1438G A2706G T3197C<br>A3434G A4769G A5656G C7028T A7768G A8860G G9477A A11467G G11719A<br>A12308G G12372A G12618A T13617C T14182C C14766T A15326G T16189C<br>C16270T                                |
| HG00272 | A257G A263G T477C A750G A1438G G3010A A4769G T8473C A8860G<br>G12795A A13933G A15326G A16182C A16183C T16189C T16362C T16519C                                                                                                                    |
| HG00273 | A73G C150T T217C A263G T310N 573insC A750G A1438G A2706G T3197C<br>A3434G T4080C A4769G A5656G C7028T A7768G A8860G G9477A A11467G<br>G11719A A12308G G12372A A12397G G12618A T13617C T14182C G14560A<br>C14766T A15326G T16189C C16192T C16270T |
| HG00274 | A73G C150T T217C A263G 573insC A750G A1438G A2706G T3197C A3434G<br>T4080C A4769G A5656G C7028T A7768G A8860G G9477A A11467G G11719A<br>A12308G G12372A A12397G G12618A T13617C T14182C C14766T A15326G<br>T16189C C16192T C16270T               |
| HG00275 | A73G C150T T217C A263G 573insC A750G A1438G A2706G T3197C A4769G<br>A5656G C7028T A7768G A8860G G9477A A11467G G11719A A12308G<br>G12372A G12618A T13617C T14182C C14766T A15326G T16189C C16192T<br>C16270T C16527T                             |
| HG00276 | A73G G185A A188G A263G C295T 310insC C462T T489C A750G A1438G<br>A2706G G3010A T4216C A4769G C7028T A8860G A8923G G9025A T10101C<br>A10398G A11251G G11719A A12612G C12891T G13708A C14766T T14798C<br>A15326G C15452A C16069T T16126C T16519C   |
| HG00277 | A73G A93G C150T A263G A750G C1341T A1438G A2706G T3197C C4059T<br>A4769G A5656G C7028T A7385G A7768G A8860G G9477A T10927C A11467G<br>G11719A A12308G G12372A G12618A T13617C T14182C C14766T A15326G<br>T16144C T16189C C16270T                 |
| HG00278 | T146C A263G A750G A1438G G2098A G3010A A4769G A8860G G11914A<br>C12906T T13246C A15326G T16519C                                                                                                                                                  |
| HG00280 | A73G A153G T195C G225A A227G A263G A750G A1438G G1719A A2706G<br>A4769G T6221C C6371T C7028T T8705C A8860G G11719A C12705T A13966G                                                                                                               |

|         |                                                                                                                                                                                                                                                       |
|---------|-------------------------------------------------------------------------------------------------------------------------------------------------------------------------------------------------------------------------------------------------------|
|         | T14470C C14766T A15326G A16182C A16183C T16189C C16223T G16255A C16278T T16519C                                                                                                                                                                       |
| HG00281 | A73G T152C A263G 310insC A750G A1438G T1700C A2706G T3197C A4769G T5495C C7028T A8860G G9477A A11467G G11719A A12308G G12372A T13617C C14766T A14793G A15218G A15326G A15924G G15930A C16256T C16270T C16294T A16399G                                 |
| HG00282 | T72C A263G T485C A750G A1438G A2706G G4580A T4639C A4769G C5263T C7028T A8860G A8869G A15326G C15904T A16183G T16298C                                                                                                                                 |
| HG00284 | A73G C150T A263G T485C A750G A896G A1438G C1721T A2706G T3197C A4732G A4769G C7028T A7768G T8715C A8860G G9477A A9545G A11329G A11467G G11719A A12308G G12372A T13617C A13637G T14182C C14766T A15326G T15511C C16148T C16192T T16311C T16519C        |
| HG00285 | A73G C150T T217C A263G T310N 573insC A750G A1438G A2706G T3197C A4769G A5656G C6068T C7028T A7768G A8860G G9477A A11467G G11719A A12308G G12372A G12618A T13617C T14182C C14766T A15326G T16189C C16192T C16270T                                      |
| HG00306 | A73G A263G A750G A1438G A2706G T3197C A4769G G5824A C7028T G7340A A8860G G9477A G9548A A11467G G11719A A12308G G12372A A13473G T13617C C14766T A14793G A15326G C16192T C16256T C16270T G16526A                                                        |
| HG00308 | A73G A189G T195C T204C G207A A263G G709A A750G T1243C A1438G A2706G A3505G A4769G G5046A G5460A T5495C C7028T C7864T G8251A A8860G G8994A C11674T G11719A A11947G T12414C C12669T C12705T C14766T A15326G G15884C C16223T C16292T T16519C             |
| HG00309 | A93G A263G C456T T721C A750G A1438G T4336C A4769G C5755N A8860G A15326G C15833T T16304C G16483A                                                                                                                                                       |
| HG00310 | A73G T152C A263G A750G A1438G G3010A A4769G A8271T A8860G A15326G A16162G T16519C                                                                                                                                                                     |
| HG00311 | A73G C150T T217C A263G 567insC A750G A1438G A2706G T3197C A3434G T4080C A4769G A5656G C7028T A7768G A8860G G9477A A11467G G11719A A12308G G12372A A12397G G12618A T13617C T14182C G14560A C14766T A15326G T16189C C16192T C16270T                     |
| HG00312 | A263G A750G A1438G A4769G A8860G T10248C T10410C T14971C A15326G T16519C                                                                                                                                                                              |
| HG00313 | A263G A750G A1438G G3010A T4452C A4769G T7309C A8860G A9066G A15326G T16093C T16189C T16519C                                                                                                                                                          |
| HG00315 | A73G C242T A263G C295T C462T T489C A750G A1438G T2158C A2706G G3010A T4216C A4769G G5460A C7028T G8269A G8557A A8860G A10398G A11251G G11719A G12007A A12612G G13708A T13879C C14766T A15326G C15452A C16069T T16126C G16145A T16172C C16222T C16261T |
| HG00318 | A263G A750G A1438G A2581G A4769G T6776C A8860G G13708A A15326G G16129A C16266T T16519C                                                                                                                                                                |
| HG00319 | T239C A263G T310N A750G A1438G G3915A A4727G A4769G T5785C T7094C A8860G G9380A T11253C A15326G T16362C A16482G                                                                                                                                       |
| HG00320 | A73G C150T A263G A750G A1438G A2706G T3197C A4769G A5656G C7028T                                                                                                                                                                                      |



|         |                                                                                                                                                                                                                                                                                          |
|---------|------------------------------------------------------------------------------------------------------------------------------------------------------------------------------------------------------------------------------------------------------------------------------------------|
|         | A7385G A7768G A8860G G9477A T10927C A11467G G11719A A12308G G12372A G12618A T13617C T14182C C14766T A15326G T16144C T16189C C16270T                                                                                                                                                      |
| HG00321 | A73G T195C A263G T310C G499A A750G A1438G A1811G A2706G G3736A T4646C A4769G T5999C A6047G C7028T C8818T A8860G C11332T A11467G G11719A A12308G G12372A C14620T C14766T A15326G T15693C C16344T T16356C T16362C T16519C                                                                  |
| HG00323 | T72C A263G T310N T485C G709A A750G A1438G A2706G G4580A T4639C A4769G C5263T C7028T A8860G A8869G A15326G C15904T A16183G T16298C                                                                                                                                                        |
| HG00324 | A263G G709A A750G A1438G C2259T A4745G A4769G G7337A 8281delC 8282delC 8283delC 8284delC 8285delC 8286delT 8287delC 8288delT 8289delA A8842G A8860G T10101C T13326C C13680T C14872T A15326G C16261T T16311C                                                                              |
| HG00325 | A73G A263G T310N 514delC 515delA A750G A1438G C3992T A4024G A4769G T5004C G8269A A8860G G9123A A10044G C14365T A14582G A15326G                                                                                                                                                           |
| HG00326 | A73G T146C T152C A263G 498delC A750G T1189C A1438G A1811G A2706G A3480G A4769G C7028T A8860G G9055A A9093G T9698C T9903C A10398G A10550G T11299C G11377A A11467G G11719A A12308G G12372A C14167T C14766T T14798C A15326G T16224C T16311C T16519C                                         |
| HG00327 | A263G C456T A750G A1438G A4769G A6323G A8860G A15326G C16291T G16390A T16519C                                                                                                                                                                                                            |
| HG00328 | A263G 310insC 514delC 515delA A750G A1438G A2581G A4769G T6776C A8860G G13708A A15326G G16129A C16266T T16519C                                                                                                                                                                           |
| HG00329 | A73G T152C T199C T204C G207A T250C A263G A533G 573insN A750G A1438G G1719A A2706G T3398C A4529T A4769G C5922T C7028T G8251A A8860G T10034C T10238C A10398G A11065G G11719A G12501A C12705T A13780G C14766T G15043A A15326G A15758G A15924G G16129A G16145A C16223T G16391A T16519C       |
| HG00330 | A73G C150T T217C A263G T310N 573insC A750G A1438G A2706G T3197C A4769G A5656G C7028T A7768G A8860G G9477A A11467G G11719A A12308G G12372A G12618A T13617C A14071G T14182C C14766T A15326G T16189C C16270T                                                                                |
| HG00331 | A73G T146C A263G 310insC C497T A750G T1189C A1438G A1811G A2706G A3480G A4295G A4769G G6260A C7028T A8860G G9055A T9698C A10398G A10550G T11299C A11467G T11485C G11719A C11840T A12308G G12372A T13401C T13740C C14167T C14766T T14798C A15326G G15884A T16224C C16245T T16311C T16519C |
| HG00332 | A73G T146C G185A A188G G228A A263G C295T C462T T489C A750G A1438G A2706G G3010A T4216C A4769G C5755N C7028T A8860G G8865A A10398G G10685A A11251G G11719A A12612G T12880C T13281C G13708A A13933G C14766T T14798C A15326G C15452A C16069T T16126C C16176T T16519C                        |
| HG00334 | A73G G185A A189G G228A A263G C295T 310insC C462T T489C A750G A1438G A2706G G3010A G3918A T4216C A4769G C7028T G7444A A8860G A10398G A11251G G11719A A12612G G13708A C13934T C14766T T14798C                                                                                              |

|         |                                                                                                                                                                                                                                                                                                         |
|---------|---------------------------------------------------------------------------------------------------------------------------------------------------------------------------------------------------------------------------------------------------------------------------------------------------------|
|         | A15326G C15452A C16069T T16126C                                                                                                                                                                                                                                                                         |
| HG00335 | A263G A750G A1438G G3010A T4452C A4769G T7309C A8860G A9066G<br>A15326G T16189C T16519C                                                                                                                                                                                                                 |
| HG00336 | A73G A189G C194T T195C T204C G207A A263G T310C 513insC 513insA G709A<br>A750G T1243C A1438G A2706G A3505G A4093G A4164G A4769G G5046A<br>G5460A C7028T G8251A T8610C T8614C A8860G G8994A C11674T G11719A<br>A11947G T12414C C12705T C14766T A15326G G15884C C16192T C16223T<br>C16292T T16325C T16519C |
| HG00337 | A73G T152C A263G G709A A750G G930A A1438G G1888A A2706G T4216C<br>A4769G A4917G G5147A C7028T G8697A A8860G A9254G G9645N T9653C<br>T10463C T10649C A11251G G11719A A11812G G13368A A14233G C14766T<br>G14905A A15326G C15452A A15607G G15928A T16126C C16193T T16304C<br>T16519C                       |
| HG00338 | A73G G185A G228A A263G C295T T310N C462T T482C T489C A750G A1438G<br>A2706G G3010A T3394C T4216C A4769G C7028T A8860G A10398G A11251G<br>G11719A A12612G G13708A C14766T T14798C G15323A A15326G C15452A<br>C16069T T16126C G16213A                                                                     |
| HG00339 | A73G T146C T152C T195C A263G T310C G499A T629C A750G A1438G A1811G<br>2404insC A2706G C2772T T4646C A4769G A5319T A5984G T5999C A6047G<br>C6938T C7028T T8260C A8860G C11332T A11467G G11719A A12308G<br>G12372A C14620T C14766T A15326G T15693C T16356C T16519C                                        |
| HG00341 | A73G C150T T217C A263G A750G A1438G A2706G T3197C A3434G A4769G<br>A5656G C5755N C7028T A7768G A8860G G9477A A11467G G11719A A12308G<br>G12372A G12618A T13617C T14182C C14766T A15326G T16189C 16192delC<br>C16270T                                                                                    |
| HG00342 | A73G A263G T310N A750G A1438G G3010A A4769G A8537G A8860G A15326G<br>A16162G T16519C                                                                                                                                                                                                                    |
| HG00343 | T239C A263G T310N A750G A1438G G3915A A4727G A4769G T5785C T7094C<br>A8860G G9380A T11253C A15326G T16362C A16482G                                                                                                                                                                                      |
| HG00344 | C41T A73G C150T A200G A263G G709A A750G A1438G G1888A A2706G<br>T4216C A4769G A4917G C7028T G8697A A8860G T10463C A11251G G11719A<br>A11812G G13368A A14233G C14766T G14905A A15326G C15452A A15607G<br>G15928A T16126C G16153A C16294T T16519C                                                         |
| HG00345 | T72C A263G T310N T485C A750G A1438G A2706G G4580A T4639C A4769G<br>C5263T C7028T A8860G A8869G A15326G C15904T A16183G T16298C<br>T16519C                                                                                                                                                               |
| HG00346 | A73G A200G A263G C497T A750G T1189C A1438G A1811G A2706G A3480G<br>A4769G G5773A C6340T C7028T C7918T A8860G G9055A T9698C A10398G<br>A10550G T11025C T11299C A11467G G11719A A12308G G12372A C13848T<br>C14167T C14766T T14798C A15326G T16224C T16311C T16519C                                        |
| HG00349 | A73G T152C A263G C325T C497T 514delC 515delA A750G T1189C A1438G<br>A1811G A2706G A3480G A4769G G6260A C7028T A8860G G9055A T9698C<br>A10029G T10370C A10398G A10550G T11299C A11467G T11485C G11719A<br>C11840T A12308G G12372A T13740C C14167T C14766T T14798C A15326G                                |

|         |                                                                                                                                                                                                                                                 |
|---------|-------------------------------------------------------------------------------------------------------------------------------------------------------------------------------------------------------------------------------------------------|
|         | G16129N T16224C T16311C T16519C                                                                                                                                                                                                                 |
| HG00350 | A263G A750G A1438G A2706G A4769G C7028T A8860G G8994A A15326G T16311C T16362C                                                                                                                                                                   |
| HG00351 | A73G A263G A750G A1438G A2706G T3197C A4769G C7028T A8860G G9477A A11467G G11719A A12308G G12372A T13617C A13827N G13928C G14198A C14766T A14793G A15326G C16114A C16192T C16256T C16270T C16294T T16311C G16526A                               |
| HG00353 | A93G A263G 514delC 515delA A750G A1438G G3010A A3796G A4769G A8860G A15326G T16189C T16356C T16362C T16519C                                                                                                                                     |
| HG00355 | A73G G185A A188G G228A A263G C295T C462T T489C A750G A1438G G1442A A2706G G3010A T4216C T4454C A4769G G6383A C7028T A8860G A10398G A11251G G11719A A12612G G13708A C14766T T14798C A15326G C15452A C16069T T16093C T16126C T16519C              |
| HG00356 | A73G T152C A263G G709A A750G G930A A1438G G1888A A2706G T4216C A4769G A4917G G5147A C7028T G8697A A8860G A9254G T10463C A11251G G11719A A11812G G13368A A14233G A14587G C14766T G14905A A15326G C15452A A15607G G15928A T16126C T16304C T16519C |
| HG00357 | A73G C150T T217C A263G 567insC A750G A1438G A2706G T3197C A3434G A4769G A5656G C7028T A7768G A8860G G9477A A11467G G11719A A12308G G12372A G12618A T13617C T14182C C14766T A15326G T16189C C16192T C16270T                                      |
| HG00358 | A73G C150T A263G A750G A1438G A2706G T3197C A4769G A5656G C7028T A7385G A7768G A8860G G9477A T10927C A11467G G11719A A12308G G12372A G12618A T13617C T14182C C14766T A15326G T16144C 16183delA C16184A T16189C C16270T                          |
| HG00359 | A73G C150T A263G A750G A1438G A1811G A2294G A2706G G3010A T4703C A4769G G6260A C6518T C7028T G8292A A8860G G9266A A10506G A11467G G11719A A12308G G12372A C13934T A14139G C14766T A15326G T15454C A16343G G16390A T16519C                       |
| HG00360 | T152C A263G A750G G951A A8860G A15326G C16354T                                                                                                                                                                                                  |
| HG00361 | A263G 514delC 515delA A750G A1438G G3010A A3796G A4769G T4823C A8860G A15326G T16189C T16356C T16519C                                                                                                                                           |
| HG00362 | T152N T199N A263G A750G A1438G G3010A A4769G T4859C A8860G A12366G A15326G T16209C T16519C                                                                                                                                                      |
| HG00364 | A73G C150T T217C A263G 573insC A750G A1438G A2706G T3197C A3434G A4769G A5656G C7028T A7768G A8860G G9477A C10307T A11467G G11719A A12308G G12372A G12618A T13617C T14182C C14766T A15326G T16189C 16192delC C16270T                            |
| HG00366 | A263G C456T 514delC 515delA A750G A1438G T4336C A4769G A8860G A15326G C15833T A16166G T16304C C16344T                                                                                                                                           |
| HG00367 | A73G A263G 514delC 515delA A750G A1438G A2706G T3197C A4769G C7028T A8860G G9477A A9667G A10754G A11467G G11719A A12308G G12372A T13617C C14766T A14793G A15218G A15326G T16093C C16192T C16256T C16270T C16291T A16399G                        |

|         |                                                                                                                                                                                                                                                                                                                   |
|---------|-------------------------------------------------------------------------------------------------------------------------------------------------------------------------------------------------------------------------------------------------------------------------------------------------------------------|
| HG00368 | A73G C150T T217C A263G A750G A1438G A2706G T3197C A4769G A5656G C7028T A7768G A8860G G9477A A11467G G11719A A12308G G12372A G12618A T13617C T14182C C14766T A15326G T16189C                                                                                                                                       |
| HG00369 | A73G T199C G203A T204C T250C A263G 455insT 573insN A750G C1342T A1438G G1719A A2706G A3447G C3990T A4529T A4769G G6734A C7028T G8251A G8616T A8860G G9053A G9947A T10034C T10238C A10398G T10915C G11719A G12501A C12705T A13780G C14766T G15043A A15326G A15924G G16129A T16172C C16223T T16311C G16391A T16519C |
| HG00372 | A93G T152C A263G T310N A750G A1438G G3010A A4769G A8860G A15326G A16183C T16189C T16519C                                                                                                                                                                                                                          |
| HG00373 | A73G T146C C150T A263G 310insC A750G A1438G A2706G T3197C C4059T A4769G A5656G C7028T A7385G A7768G C8428A A8860G G9477A T10927C A11467G G11719A A12308G G12372A G12618A T13617C T14182C C14766T A15326G T16144C T16189C C16270T                                                                                  |
| HG00375 | A73G G185A A188G A263G C295T 310insC C462T T489C A750G A1438G A2706G G3010A T4216C A4769G C7028T A8860G A8923G T10101C A10398G A11251G G11719A A12612G C12891T G13708A C14766T T14798C A15326G C15452A C16069T T16126C T16519C                                                                                    |
| HG00376 | A73G C150T A263G A750G A1438G A2706G T3197C A4769G A5656G G5744N C7028T A7385G A7768G A8860G G9477A T10927C A11467G G11719A A12308G G12372A G12618A T13617C T14182C C14766T A15326G T16144C T16189N C16270T                                                                                                       |
| HG00377 | A73G G185A A188G A263G C295T C462T T489C A750G A1438G A2706G G3010A T4216C A4769G C7028T A8860G A8923G A10398G A11251G G11719A A12612G G13708A C14766T T14798C A15326G C15452A C16069T T16126C T16519C                                                                                                            |
| HG00378 | A73G A263G 310insC A750G A1438G G3010A A4769G A8271T A8860G A15326G A16162G T16519C                                                                                                                                                                                                                               |
| HG00380 | A73G A263G 310insC A750G A1438G G3010A A4769G T7080C A8537G A8860G A15326G A16162G T16519C                                                                                                                                                                                                                        |
| HG00381 | A73G T152C A263G A750G A1438G G3010A A4769G A8271T A8860G A15326G A16162G T16519C                                                                                                                                                                                                                                 |
| HG00382 | T146C A263G A750G A1438G G3010A A4769G G7013A A8860G G11914A C14482T A14564G A15326G T16519C                                                                                                                                                                                                                      |
| HG00383 | A263G A750G A1438G A4769G G5763N A8860G C9391T G11719A T13569C A15326G T16093C G16129A A16316G T16519C                                                                                                                                                                                                            |
| HG00384 | A73G C150T A263G A750G A1438G A2706G T3197C A4769G A5656G C7028T A7385G A7768G A8860G G9477A T10927C A11467G G11719A A12308G G12372A G12618A T13617C T14182C C14766T A15326G T16144C 16183delA C16184A T16189C C16270T                                                                                            |
| HG00553 | A73G T146C A153G A235G A263G 514delC 515delA A663G A750G A1438G A1736G A2706G T4248C A4769G A4824G C7028T G8027A C8794T A8860G A11653G G11719A G12007A C12705T A13731G C14766T A15326G C16111T C16223T C16290T G16319A T16362C                                                                                    |

|         |                                                                                                                                                                                                                                                                                                                                                                                                                                                                                                                                                                                                   |
|---------|---------------------------------------------------------------------------------------------------------------------------------------------------------------------------------------------------------------------------------------------------------------------------------------------------------------------------------------------------------------------------------------------------------------------------------------------------------------------------------------------------------------------------------------------------------------------------------------------------|
| HG00554 | A73G T152C C182T G185T A189G T195C G247A A263G A357G 514delC 515delA G709A T710C A750G G769A T825A G1018A T1738C T2352C A2706G G2758A A2768G T2885C T3308C C3594T G3666A G3693A A4104G A4769G A5036G G5046A T5393C T5655C C6548T T6827C A6989G C7028T A7055G A7146G C7256T T7389C G7521A C7867T A8248G C8468T C8655T A8701G A8860G T9540C A10398G G10688A T10810C T10873C A11020G G11719A T12519C C12705T A13105G C13506T C13650T T13789C C13880A G13980A T14178C A14203G G14560A C14766T A14769G T15115C A15326G T16126C C16187T T16189C C16223T C16264T C16270T C16278T A16293G T16311C T16519C |
| HG00637 | C64T A73G T146C A153G A235G A263G 514delC 515delA A663G A750G A1438G A1736G A2706G T3202C T4248C A4769G A4824G C7028T G8027A A8460G C8794T A8860G G11719A G12007A C12705T C14766T A15326G A15924G T16086N C16111T C16223T C16290T G16319A T16362C                                                                                                                                                                                                                                                                                                                                                 |
| HG00638 | A73G T146C A153G A235G A263G A384G 514delC 515delA A663G A750G A1438G A1736G A2706G C4011T T4248C A4769G A4824G C7028T G8027A C8794T A8860G A11653G G11719A G12007A C12705T A13731G C14766T A15326G T15586C C16111T C16223T C16290T G16319A T16362C                                                                                                                                                                                                                                                                                                                                               |
| HG00640 | A73G T152C A263G C271T T310N T460C G499A A750G A827G A1438G A2706G A3547G G3918A A4012G T4232C A4769G G4820A T4977C C6473T G6755A C7028T 8281delC 8282delC 8283delC 8284delC 8285delC 8286delT 8287delC 8288delT 8289delA A8860G T9950C C11177T G11719A G13590A G13708A C14766T A15326G C15535T T15784C T16092C A16182C A16183C T16189C T16217C T16249C A16312G C16344T T16519C                                                                                                                                                                                                                   |
| HG00641 | A73G 248delA 286delA 287delA T489C A493G 514delC 515delA A750G A1438G A2706G T3552A C4242T A4715G A4769G G7013A C7028T C7196A G8584A A8701G A8860G T9540C A9545G C9557T A10398G C10400T T10873C G11719A G11914A G12454A C12705T A13263G T14318C C14766T T14783C G15043A G15301A A15326G A15487T C16223T T16298C T16325C C16327T T16519C                                                                                                                                                                                                                                                           |
| HG00731 | A73G T146C T152C A153G A214G A235G A263G 514delC 515delA A663G A750G A1438G A1736G A2706G C2836T A3744G T4248C A4769G A4824G T6632C C7028T G8027A C8794T A8860G A8901G A11654N G11719A G12007A C12705T C14766T A15326G C16083T C16111T C16223T C16256T C16290T G16319A T16362C                                                                                                                                                                                                                                                                                                                    |
| HG00732 | A73G T146C A153G A235G A263G 310insC 514delC 515delA A663G A750G A1438G A1736G A2706G T4248C A4769G A4824G C7028T G8027A C8794T A8860G A11653G G11719A G12007A C12705T A13731G C14766T A15326G C16111T C16223T C16290T G16319A T16362C                                                                                                                                                                                                                                                                                                                                                            |
| HG00734 | A73G 248delA 286delA 287delA T489C A493G 514delC 515delA A750G A1438G A2706G T3552A C4242T A4715G A4769G G7013A C7028T C7196A G8584A A8701G A8860G T9540C A9545G C9557T A10398G C10400T T10873C G11719A G11914A G12454A C12705T A13263G A14053G T14318C C14766T T14783C G15043A G15301A A15326G A15487T C16223T T16298C T16325C C16327T T16519C                                                                                                                                                                                                                                                   |

|         |                                                                                                                                                                                                                                                                                                                                                                                                                                                                                                                                                                                                                |
|---------|----------------------------------------------------------------------------------------------------------------------------------------------------------------------------------------------------------------------------------------------------------------------------------------------------------------------------------------------------------------------------------------------------------------------------------------------------------------------------------------------------------------------------------------------------------------------------------------------------------------|
| HG00736 | A73G T146C T152C A153G A214G A235G A263G 514delC 515delA A663G A750G A1438G A1736G A2706G C2836T T4248C A4769G A4824G T6632C C7028T G8027A C8794T A8860G G11719A G12007A C12705T C14766T A15326G C16083T C16111T T16126C C16223T C16256T C16290T G16319A T16362C                                                                                                                                                                                                                                                                                                                                               |
| HG00737 | A73G 248delA 286delA 287delA T489C A493G 514delC 515delA A750G A1438G A2706G T3552A C4242T A4715G A4769G G7013A C7028T C7196A G8584A A8701G A8860G T9540C A9545G C9557T A10398G C10400T T10873C G11719A G11914A G12454A C12705T A13263G T14318C C14766T T14783C G15043A G15301A A15326G A15487T C16223T T16298C T16325C C16327T T16519C                                                                                                                                                                                                                                                                        |
| HG00740 | A73G T152C C182T G185T T195C C198T G228A G247A A263G A357G 514delC 515delA G709A T710C A750G G769A T825A G1018A T1738C T2352C A2706G G2758A A2768G T2885C T3308C C3594T G3666A G3693A A4104G A4769G A5036G G5046A T5393C T5655C T6378C C6548T T6827C A6989G C7028T A7055G A7146G C7256T T7389C G7521A C7867T A8248G C8468T C8655T A8701G A8860G T9540C A10398G G10688A T10810C T10873C G11719A T12519C C12705T A13105G C13506T C13650T T13789C C13880A A14053G T14178C A14203G G14560A C14766T A14769G T15115C C15224T A15326G T16126C C16187T T16189C C16223T C16264T C16270T C16278T A16293G T16311C T16519C |
| HG01047 | C64T A73G T146C A153G A235G A263G 514delC 515delA A663G A750G A1438G A1736G A2706G T4248C A4769G A4824G T6253C C7028T T7842C G8027A C8794T A8860G G11719A G12007A C12705T C14766T T15229C G15314A A15326G C16111T G16129A C16223T C16290T G16319A T16362C                                                                                                                                                                                                                                                                                                                                                      |
| HG01048 | A73G 248delA 286delA 287delA T489C A493G 514delC 515delA A750G A1438G A2706G T3552A C4242T A4715G A4769G G7013A C7028T C7196A G8584A A8701G A8860G T9540C A9545G C9557T A10398G C10400T T10873C G11719A G11914A G12454A C12705T A13263G T14318C C14766T T14783C G15043A G15301A A15326G A15487T C16223T T16298C T16325C C16327T T16519C                                                                                                                                                                                                                                                                        |
| HG01051 | A73G T152C A263G C497T A750G T1189C A1438G A1811G A2706G A3480G A4769G G6260A C7028T C8461T A8860G G9055A T9698C A10398G A10550G T11204C T11299C A11467G T11485C G11719A C11840T T11841C A12308G G12372A T13404C T13740C C14167T C14766T T14798C A15326G T16093C T16224C T16311C T16519C                                                                                                                                                                                                                                                                                                                       |
| HG01052 | A73G T146C C150T T152C T195C A215G A263G C295T T319C T489C G513A A750G A1438G T2392C A2706G T4216C A4769G C7028T C7476T G7789A A8860G A10398G A10499G A11251G G11377A G11719A A12612G G13708A A13722G A14133G C14766T G15257A A15326G C15452A C16069T T16126C G16145A T16231C C16261T                                                                                                                                                                                                                                                                                                                          |
| HG01055 | A73G C150T A263G T279C 455insT A517T A750G A1438G C1721T A2706G A2755G T3197C T3338C A4769G T5074C G5261A C7028T A7768G A8860G G9477A G9612A A11467G A11653G G11719A A12308G G12372A A12634G T13617C A13630G A13637G T14182C C14766T A15326G T15905C T16224C C16270T                                                                                                                                                                                                                                                                                                                                           |

|         |                                                                                                                                                                                                                                                                                                                                                                                           |
|---------|-------------------------------------------------------------------------------------------------------------------------------------------------------------------------------------------------------------------------------------------------------------------------------------------------------------------------------------------------------------------------------------------|
| HG01060 | C64T A73G T146C A153G A235G A263G 514delC 515delA A663G A750G A1438G A1736G A2706G T3202C T4248C A4769G A4824G C7028T G8027A A8460G C8794T A8860G G11719A G12007A C12705T C14766T A15326G A15924G C16111T C16223T C16290T G16319A T16362C                                                                                                                                                 |
| HG01061 | A73G T146C T152C A153G A214G A235G A263G 514delC 515delA A663G A750G A1438G A1736G A2706G C2836T A3744G T4248C A4769G A4824G T6632C C7028T G8027A C8794T A8860G G11719A G12007A C12705T C14766T A15326G C16083T C16111T C16223T C16256T C16290T G16319A T16362C                                                                                                                           |
| HG01066 | A73G G185A T195C 248delA A263G 286delA 287delA A335G T489C 514delC 515delA A750G A1438G G1888A A2706G T3552A A3744G A4715G A4769G C7028T C7196A G7598A G8584A A8701G A8860G T9540C A9545G A10398G C10400T T10873C G11719A G11914A C12378T C12687T C12705T A13153G A13263G T14318C C14766T T14783C G15043A G15301A A15326G A15487T G15930A C16221T C16223T C16261T T16298C T16325C C16327T |
| HG01067 | A73G 248delA 286delA 287delA T489C A493G A750G A1438G A2706G T3552A C4242T A4715G A4769G G7013A C7028T C7196A G8584A A8701G A8860G T9540C A9545G C9557T A10398G C10400T T10873C G11719A G11914A G12454A C12705T A13263G T14318C C14766T T14783C G15043A G15301A A15326G A15487T C16223T T16298C T16325C C16327T T16519C                                                                   |
| HG01069 | A73G 248delA 286delA 287delA T489C A493G 514delC 515delA A750G A1438G A2706G T3552A C4242T A4715G A4769G G7013A C7028T C7196A G8584A A8701G A8860G T9540C A9545G C9557T A10398G C10400T T10873C G11719A G11914A G12454A C12705T A13263G T14318C C14766T T14783C G15043A G15301A A15326G A15487T C16223T T16298C T16325C C16327T T16519C                                                   |
| HG01070 | A73G G143A 248delA A263G 286delA 287delA T489C A493G A750G A2706G T3552A C4167T A4715G A4769G C7028T C7196A G8584A A8701G A8860G T9540C A9545G A10398G C10400T T10873C G11719A G11914A C12705T A13263G T14318C A14524G C14766T T14783C G15043A G15301A A15326G A15487T T16086C A16183C T16189C C16223T C16278T T16298C T16325C C16327T                                                    |
| HG01072 | A73G 248delA 286delA 287delA T489C A493G 514delC 515delA A750G A1438G A2706G T3552A C4242T A4715G A4769G G7013A C7028T C7196A G8584A A8701G A8860G T9540C A9545G C9557T A10398G C10400T T10873C G11719A G11914A G12454A C12705T A13263G T14318C C14766T T14783C G15043A G15301A A15326G A15487T C16223T T16298C T16325C C16327T T16519C                                                   |
| HG01073 | G90A G97A 106delG 107delG 108delA 109delG 110delC 111delA C150T A189G A200G A263G A750G A1438G T2352C A2706G A4562G A4769G T6221C C6587T C7028T A8701G A8860G T9098C T9540C T10370C A10398G A10819G T10873C G11719A G12164A C12705T A14152G T14212C C14766T G15301A A15326G T15670C T15942C C16223T C16327T                                                                               |
| HG01075 | A73G G185A A188G G228A A238N A263G C295T 310insC C462T T489C A750G A1438G A2706G G3010A T4216C A4769G T6638C C7028T A8860G A10398G T10463C A11251G G11719A A12612G G13708A C14766T T14798C A15326G C15452A C16069T T16126C C16366T T16519C                                                                                                                                                |

|         |                                                                                                                                                                                                                                                                                                                                                                                                                                                                                                                                                                                                                                                                                |
|---------|--------------------------------------------------------------------------------------------------------------------------------------------------------------------------------------------------------------------------------------------------------------------------------------------------------------------------------------------------------------------------------------------------------------------------------------------------------------------------------------------------------------------------------------------------------------------------------------------------------------------------------------------------------------------------------|
| HG01079 | A73G T152C A263G C271T T310N T454C T455C T460C G499A A750G A827G A1438G A2706G A3547G G3918A A4012G T4232C A4769G G4820A T4977C C6473T G6755A C7028T 8281delC 8282delC 8283delC 8284delC 8285delC 8286delT 8287delC 8288delT 8289delA A8860G T9950C C11177T G11719A G13590A G13708A C14766T A15326G C15535T T15784C T16092C 16182delA 16183delA T16189C T16217C T16249C A16312G C16344T T16519C                                                                                                                                                                                                                                                                                |
| HG01080 | A73G C151T T152C C182T C186A A189C G247A A263G G316A 514delC 515delA T629C A750G G769A T825A G1018A A1438G C2283T 2395delA A2706G G2758A T2885C C3210T A3434G C3594T G3666A A4104G T4755C A4769G A5951G T6071C T6221A G6917A C7028T A7146G C7256T T7389C G7521A G8027A G8251A C8417T C8468T C8655T A8701G A8860G A9072G T9540C A10398G G10586A G10688A T10810C T10873C C11302T A11317G G11719A A12400G C12542T C12705T A12810G A13105G A13485G C13506T C13650T G13708A T13789C C13981T T14000A T14178C G14560A C14766T C14794T C14911T A15226G A15326G T15905C C15978T T16017C G16129A A16163G C16187T T16189C T16209C C16223T C16278T A16293G C16294T T16311C C16360T T16519C |
| HG01082 | C64T A73G T146C A153G A235G A263G 514delC 515delA A663G A750G A1438G A1736G A2706G T3202C A3492N T4248C A4769G A4824G C7028T G8027A A8460G C8794T A8860G G11719A G12007A C12705T C14766T A15326G A15924G C16111T C16223T C16259T C16290T G16319A T16362C                                                                                                                                                                                                                                                                                                                                                                                                                       |
| HG01083 | A73G T146C T152C A153G A214G A235G A263G 310insC 514delC 515delA A663G A750G A1438G A1736G A2706G C2836T A3744G T4248C A4769G A4824G T6632C C7028T G8027A C8794T A8860G G11719A G12007A C12705T C14766T A15326G C16083T C16111T C16223T C16256T C16290T G16319A T16362C                                                                                                                                                                                                                                                                                                                                                                                                        |
| HG01085 | C64T A73G T146C A153G A235G A263G 514delC 515delA A663G A750G A1438G A1736G A2706G T3202C T4248C A4769G A4824G G5147A C5743N G5744N G5745N G5746N A5747N C7028T T7961C G8027A C8794T A8860G C10128T G11719A G12007A C12705T A14551G C14766T A15326G T15519C C16223T C16290T G16319A T16362C G16391A T16519C                                                                                                                                                                                                                                                                                                                                                                    |
| HG01095 | G90A G97A 106delG 107delG 108delA 109delG 110delC 111delA C150T A189G A200G A263G A750G A1438G T2352C A2706G A4562G A4769G T6221C C6587T C7028T A8389G A8701G A8860G T9098C T9540C T10370C A10398G A10819G T10873C G11719A C12705T A14152G T14212C C14766T G15301A A15326G T15670C T15942C C16223T C16327T                                                                                                                                                                                                                                                                                                                                                                     |
| HG01097 | C64T A73G T146C A153G A235G T239C A263G 310insC 514delC 515delA A663G A750G A1438G A1736G A2706G T3202C T4248C A4769G A4824G C7028T G8027A A8460G C8794T A8860G G11719A G12007A C12705T C14766T A15326G A15924G C16111T C16223T C16259T C16290T G16319A T16362C                                                                                                                                                                                                                                                                                                                                                                                                                |
| HG01098 | A73G C242T A263G C295T 310insC C462T T489C A750G A1438G T2158C A2706G G3010A C3324T T4216C A4769G G5460A C7028T G8269A G8557A A8860G G9438A A10398G A11251G G11719A G12007A A12612G G13708A T13879C G14560A C14766T A15326G C15452A C15740T C16069T T16126C                                                                                                                                                                                                                                                                                                                                                                                                                    |



|         |                                                                                                                                                                                                                                                                                                                                                                                                                                                                                                                                                                                                                                                  |
|---------|--------------------------------------------------------------------------------------------------------------------------------------------------------------------------------------------------------------------------------------------------------------------------------------------------------------------------------------------------------------------------------------------------------------------------------------------------------------------------------------------------------------------------------------------------------------------------------------------------------------------------------------------------|
|         | G16145A T16172C C16222T C16261T                                                                                                                                                                                                                                                                                                                                                                                                                                                                                                                                                                                                                  |
| HG01101 | A73G G143A 248delA A263G 286delA 287delA T489C A493G 514delC 515delA A750G A2706G T3552A C4167T A4715G A4769G C7028T C7196A G8584A A8701G A8860G T9540C A9545G A10398G C10400T T10873C G11719A G11914A C12705T A13263G T14318C A14524G C14766T T14783C G15043A G15301A A15326G A15487T T16086C A16183C T16189C C16223T C16278T T16298C T16325C C16327T                                                                                                                                                                                                                                                                                           |
| HG01102 | A73G 248delA 286delA 287delA 310insC T489C A493G A750G A1438G A2706G T3552A C4242T A4715G A4769G G7013A C7028T C7196A G8584A A8701G A8860G T9540C A9545G C9557T A10398G C10400T T10873C G11719A G11914A G12454A C12705T A13263G T14318C C14766T T14783C G15043A G15301A A15326G A15487T C16223T T16298C T16325C C16327T T16519C                                                                                                                                                                                                                                                                                                                  |
| HG01104 | C64T A73G T146C A153G A235G T239C A263G 514delC 515delA A663G A750G A1438G A1736G A2706G T3108N T3202C T4248C A4769G A4824G G5744N G5745N G5746N A5747N A5748N G5753N G5754N C7028T G8027A A8460G C8794T A8860G G11719A G12007A C12705T C14766T A15326G A15924G C16111T C16223T C16259T C16290T G16319A T16362C                                                                                                                                                                                                                                                                                                                                  |
| HG01105 | C64T A73G T146C A153G A235G A263G 514delC 515delA A663G A750G A1438G A1736G A2706G T3202C T4248C A4769G A4824G G5147A C5743N G5744N G5745N C7028T T7961C G8027A C8794T A8860G C10128T G11719A G12007A C12705T A14551G C14766T A15326G T15519C C16223T C16290T G16319A T16362C G16391A T16519C                                                                                                                                                                                                                                                                                                                                                    |
| HG01107 | C64T A73G T146C A153G A235G A263G 514delC 515delA A663G A750G A1438G A1736G A2706G T3202C T4248C A4769G A4824G C7028T G8027A A8460G C8794T A8860G G11719A G12007A C12705T C14766T A15326G A15924G C16111T C16223T C16290T G16319A T16362C                                                                                                                                                                                                                                                                                                                                                                                                        |
| HG01108 | C64T A93G A95T G185A A189G A200G T236C G247A A263G 310insC 514delC 515delA A750G G769A T825A G1018A C1048T A1438G A2245C A2706G G2758A T2885C C3516A C3594T T3866C A4104G C4312T T4586C A4769G T5096C G5112A G5231A T5442C G5460A C5603T T6185C C7028T A7146N C7256T G7521A C8428T C8468T A8566G C8655T A8701G A8860G C9042T A9347G T9540C G9755A C9818T A10398G G10589A C10664T G10688A T10810C T10873C T10915C G11176A A11641G G11719A G11914A G12007A C12705T A12720G A13105G A13276G C13506T C13650T T14308C C14766T C15136T A15326G G15431A G16129A C16148T C16168T T16172C C16187T C16188G T16189C C16223T A16230G T16311C C16320T T16362C |
| HG01112 | A73G T146C A153G A235G A263G 514delC 515delA A663G A750G A1438G A1736G A2706G T3083C T4248C A4769G A4824G C7028T G8027A C8794T A8860G G9055A A9377G A9473C G11719A G12007A C12705T A14687G C14766T T15074C A15326G C16111T G16213A C16223T C16290T G16319A T16362C                                                                                                                                                                                                                                                                                                                                                                               |
| HG01113 | C64T A73G T146C A153G A235G A263G 514delC 515delA A663G A750G A1438G A1736G A2706G T4248C A4769G A4824G C7028T A7124G G8027A C8794T A8860G G11016A G11719A G12007A C12705T C14766T A15326G                                                                                                                                                                                                                                                                                                                                                                                                                                                       |

|         |                                                                                                                                                                                                                                                                                                                                                                                                 |
|---------|-------------------------------------------------------------------------------------------------------------------------------------------------------------------------------------------------------------------------------------------------------------------------------------------------------------------------------------------------------------------------------------------------|
|         | C16111T C16223T C16290T G16319A T16362C                                                                                                                                                                                                                                                                                                                                                         |
| HG01124 | A73G G143A T152C T195C A263G T489C A750G A1438G A2308G A2706G<br>G3010A T3336C T3396C T3644C C4025T T4363C A4769G C4883T T5048C<br>C5178A G6285A C7028T C8414T A8701G G8854A A8860G A8946G G8989A<br>T9110C C9458T T9540C A10398G C10400T T10873C G11719A C12705T<br>G13135A C14668T C14766T T14783C G15043A G15301A A15326G T16172C<br>C16185T C16192T C16223T C16301T T16342C T16362C A16463G |
| HG01125 | C64T A73G T146C A153G A235G A263G 514delC 515delA A663G A750G<br>A1438G A1736G A2706G T4248C A4769G A4824G C7028T A7124G G8027A<br>C8794T A8860G G11016A G11719A G12007A C12705T C14766T A15326G<br>C16111T C16223T C16290T G16319A T16362C                                                                                                                                                     |
| HG01133 | A73G T152C A263G T310N 498delC G499A A750G A827G A1438G A2706G<br>A3547G A4122G A4123G A4769G G4820A T4977C C6473T C7028T 8281delC<br>8282delC 8283delC 8284delC 8285delC 8286delT 8287delC 8288delT 8289delA<br>A8659G A8860G T8875C T9682C T9950C C11177T G11719A G13590A C14766T<br>A15326G C15535T A16183C T16189C T16217C C16360T T16519C                                                  |
| HG01134 | C64T A73G T146C A153G A235G A263G 514delC 515delA A663G A750G<br>A1438G A1736G A2706G T4248C A4769G A4824G C7028T T7142C G8027A<br>C8794T A8860G G10310A G11719A G12007A C12705T C14766T C15298T<br>A15326G C16111T T16131C T16209C C16223T C16290T T16311C G16319A<br>T16362C                                                                                                                  |
| HG01136 | A73G A263G 498delC G499A A750G A827G A1438G A2706G A3547G A4122G<br>A4123G A4769G G4820A T4977C C6473T C7028T 8281delC 8282delC 8283delC<br>8284delC 8285delC 8286delT 8287delC 8288delT 8289delA A8860G T8875C<br>T9682C T9950C C11177T G11719A G13590A C14766T A15326G C15535T<br>A16183C T16189C T16217C T16519C                                                                             |
| HG01137 | A73G A263G 498delC G499A A750G A827G A1438G A2706G A3547G A4122G<br>A4123G A4769G G4820A T4977C C6473T C7028T 8281delC 8282delC 8283delC<br>8284delC 8285delC 8286delT 8287delC 8288delT 8289delA A8860G T8875C<br>T9682C T9950C C11177T G11719A G13590A G14462N C14766T A15326G<br>C15535T A16183C T16189C T16217C C16256T T16519C                                                             |
| HG01140 | A73G A263G 498delC G499A A750G A827G A1438G A2706G A3547G A4122G<br>A4123G A4769G G4820A T4977C C6473T C7028T 8281delC 8282delC 8283delC<br>8284delC 8285delC 8286delT 8287delC 8288delT 8289delA A8860G T8875C<br>G9548A T9682C T9950C C11177T G11719A G13590A C14766T A15326G<br>C15535T C16179T A16183C T16189C T16217C T16519C                                                              |
| HG01148 | A73G A263G 498delC G499A A750G A827G A1438G A2706G A3547G A4122G<br>A4123G A4769G G4820A T4977C C6473T C7028T 8281delC 8282delC 8283delC<br>8284delC 8285delC 8286delT 8287delC 8288delT 8289delA A8860G T8875C<br>T9682C T9950C C11177T G11719A G13590A C14766T A15326G C15535T<br>A16183C T16189C T16217C T16519C                                                                             |
| HG01149 | A73G A263G 498delC G499A A750G A827G A1438G A2706G A3547G A4122G<br>A4123G A4769G G4820A T4977C C6473T C7028T 8281delC 8282delC 8283delC<br>8284delC 8285delC 8286delT 8287delC 8288delT 8289delA A8860G T8875C                                                                                                                                                                                 |

|         |                                                                                                                                                                                                                                                                                                                                                                                                                                                                                                                                                                                                           |
|---------|-----------------------------------------------------------------------------------------------------------------------------------------------------------------------------------------------------------------------------------------------------------------------------------------------------------------------------------------------------------------------------------------------------------------------------------------------------------------------------------------------------------------------------------------------------------------------------------------------------------|
|         | G9548A T9682C T9950C C11177T G11719A G13590A C14766T A15326G C15535T C16179T A16183C T16189C T16217C T16519C                                                                                                                                                                                                                                                                                                                                                                                                                                                                                              |
| HG01167 | T152C A263G 310insC A750G A1438G G3010A A4769G A8860G G15148A A15326G T16189C T16356C T16519C                                                                                                                                                                                                                                                                                                                                                                                                                                                                                                             |
| HG01168 | A73G T146C T152C T195C A263G 310insC G499A A750G A1438G A1811G A2706G T4646C A4769G T5999C A6047G C7028T G7444A T7705C A8860G A9254N C11332T T11339C A11467G G11719A A12308G G12372A A13528G C13565T C14620T C14766T A15326G T15693C T16086C T16356C T16519C                                                                                                                                                                                                                                                                                                                                              |
| HG01170 | G90A G97A 106delG 107delG 108delA 109delG 110delC 111delA C150T A189G A200G A263G 310insC A750G A1438G T2352C A2706G A4562G A4769G T6221C C6587T C7028T A8701G A8860G T9098C T9540C T10370C A10398G A10819G T10873C G11719A C12705T A14152G T14212C C14766T G15301A A15326G T15670C T15942C C16223T C16327T                                                                                                                                                                                                                                                                                               |
| HG01171 | A73G T146C A153G A235G A263G 514delC 515delA A663G A750G A1438G A1736G A2706G T4248C A4769G A4824G C7028T G8027A C8794T A8860G G11719A G12007A C12705T G13368A T14757C C14766T A15326G T16097C A16098G C16111T T16189C C16223T C16290T G16319A C16320T T16362C                                                                                                                                                                                                                                                                                                                                            |
| HG01173 | A153G A263G 514delC 515delA A750G A1438G C2259T A4231G A4745G A4769G A7903G A8860G C14872T A15326G C16291T T16519C                                                                                                                                                                                                                                                                                                                                                                                                                                                                                        |
| HG01174 | A73G T146C A153G A235G A263G 514delC 515delA A663G A750G A1438G A1736G A2706G T4248C A4769G A4824G C7028T G8027A C8794T A8860G A11653G G11719A G12007A C12705T A13731G C14766T A15326G C16111T C16223T C16290T G16319A T16362C                                                                                                                                                                                                                                                                                                                                                                            |
| HG01176 | A73G T152C C182T G185T A189G T195C G247A A263G 310insC A357G 514delC 515delA G709A T710C A750G G769A T825A G1018A T1738C T2352C A2706G G2758A A2768G T2885C T3308C C3594T G3666A G3693A A4104G A4769G A5036G G5046A T5393C T5655C C6548T T6827C A6989G C7028T A7055G A7146G C7256T T7389C G7521A C7867T A8248G C8468T C8655T A8701G A8860G T9540C A10398G G10688A T10810C T10873C A11020G G11719A T12519C C12705T A13105G C13506T C13650T T13789C C13880A G13980A T14178C A14203G G14560A C14766T A14769G T15115C A15326G T16126C C16187T T16189C C16223T C16264T C16270T C16278T A16293G T16311C T16519C |
| HG01183 | C64T A73G T146C A153G A235G A263G T310N 514delC 515delA A663G A750G A1438G A1736G A2706G T4248C A4769G A4824G T6253C C7028T G8027A C8794T A8860G G11719A G12007A C12705T C14766T T15229C G15314A A15326G C16111T G16129A C16223T C16290T G16319A T16362C                                                                                                                                                                                                                                                                                                                                                  |
| HG01187 | A73G T146C A153G T179C A235G A263G A385G 514delC 515delA A663G A750G A1438G A1736G A2706G T4248C A4769G A4824G C7028T G8027A C8794T A8860G G11719A G12007A C12705T C14766T A15326G C16111T C16218T C16223T C16290T G16319A T16362C T16519C                                                                                                                                                                                                                                                                                                                                                                |
| HG01188 | A73G C150T T152C C182T T195C C198T T204C A263G C418T 514delC 515delA A750G G769A G1018A A1438G G1442A C1706T C2332T A2358G T2416C A2706G C3594T A4104G A4158G T4370C A4767G A4769G C5027T C5331A                                                                                                                                                                                                                                                                                                                                                                                                          |

|         |                                                                                                                                                                                                                                                                                                                                                                                             |
|---------|---------------------------------------------------------------------------------------------------------------------------------------------------------------------------------------------------------------------------------------------------------------------------------------------------------------------------------------------------------------------------------------------|
|         | T5814C G6026A C6713T C7028T C7256T G7521A T7624A G7775N C8080T G8206A G8387A A8701G G8856A A8860G A9221G T9540C T10115C A10398G T10828C T10873C G11719A T11944C G12236A C12705T A12948G G13590A C13650T C13924T A14059G A14693G C14766T G15110A G15217A G15301A A15326G C16114A G16129A G16213A C16223T C16278T C16355T T16362C G16390A                                                     |
| HG01190 | A73G 248delA 286delA 287delA T489C A493G A750G A1438G A2706G T3552A C4242T A4715G A4769G G7013A C7028T C7196A G8584A A8701G A8860G T9540C A9545G C9557T A10398G C10400T T10873C G11719A G11914A G12454A C12705T A13263G T14318C C14766T T14783C G15043A G15301A A15326G A15487T C16223T T16298C T16325C C16327T T16519C                                                                     |
| HG01191 | A73G T152C A263G C271T T310N T454C T455C T460C G499A A750G A827G A1438G A2706G A3547G G3918A A4012G T4232C A4769G G4820A T4977C C6473T G6755A C7028T 8281delC 8282delC 8283delC 8284delC 8285delC 8286delT 8287delC 8288delT 8289delA A8860G T9950C C11177T G11719A G13590A G13708A C14766T A15326G C15535T T15784C T16092C A16182C A16183C T16189C T16217C T16249C A16312G C16344T T16519C |
| HG01197 | A73G C150T A263G T279C 455insT A517T A750G A1438G C1721T A2706G A2755G T3197C T3338C A4769G T5074C G5261A C7028T A7768G A8860G G9477A G9612A A11467G A11653G G11719A A12308G G12372A A12634G T13617C A13630G A13637G T14182C C14766T A15326G T15905C T16224C C16270T                                                                                                                        |
| HG01198 | A73G T152C A263G C271T T310N 454delT T460C G499A A750G A827G A1438G A2706G A3547G G3918A A4012G T4232C A4769G G4820A T4977C C6473T G6755A C7028T 8281delC 8282delC 8283delC 8284delC 8285delC 8286delT 8287delC 8288delT 8289delA A8860G T9950C C11177T G11719A G13590A G13708A C14766T A15326G C15535T T15784C T16092C 16182delA 16183delA T16189C T16217C T16249C A16312G C16344T T16519C |
| HG01204 | A73G 248delA 286delA 287delA T489C A493G 514delC 515delA A750G A1438G A2706G T3552A C4242T A4715G A4769G G7013A C7028T C7196A G8584A A8701G A8860G T9540C A9545G C9557T A10398G C10400T T10873C G11719A G11914A G12454A C12705T A13263G T14318C C14766T T14783C G15043A G15301A A15326G A15487T C16223T T16298C T16325C C16327T T16519C                                                     |
| HG01250 | C64T A73G T146C A153G A235G A263G 514delC 515delA A663G A750G A1438G A1736G A2706G T4248C A4769G A4824G C7028T T7142C G8027A C8794T A8860G G10310A G11719A G12007A C12705T C14766T C15298T A15326G C16111T T16131C T16209C C16223T C16290T T16311C G16319A T16362C                                                                                                                          |
| HG01251 | A73G T146C A153G A235G A263G 514delC 515delA A663G A750G A1438G A1736G A2706G T3083C T4248C A4769G A4824G C7028T G8027A C8794T A8860G G9055A A9377G A9473C G11719A G12007A C12705T A14687G C14766T T15074C A15326G C16111T G16213A C16223T C16290T G16319A T16362C                                                                                                                          |
| HG01253 | A73G A263G 498delC G499A 513insC 513insA A750G A827G A1438G A2706G                                                                                                                                                                                                                                                                                                                          |

|         |                                                                                                                                                                                                                                                                                                                         |
|---------|-------------------------------------------------------------------------------------------------------------------------------------------------------------------------------------------------------------------------------------------------------------------------------------------------------------------------|
|         | A3547G A4122G A4123G A4769G G4820A T4977C C6473T C7028T 8281delC 8282delC 8283delC 8284delC 8285delC 8286delT 8287delC 8288delT 8289delA A8860G T8875C T9682C T9725C T9950C A10398G C11177T G11719A G13590A C14766T A15326G C15535T A16183C T16189C T16217C T16519C                                                     |
| HG01254 | A73G A263G 310insC 498delC G499A A750G A827G A1438G A2706G A3547G A4122G A4769G G4820A T4977C C6473T C7028T 8281delC 8282delC 8283delC 8284delC 8285delC 8286delT 8287delC 8288delT 8289delA A8860G T8875C T9682C T9950C C11177T G11719A G13590A C14766T A15326G C15535T A16183C T16189C T16217C T16519C                |
| HG01257 | A73G A263G G499N A750G A827G A1438G A2706G A3547G A4769G G4820A T4977C C6473T C7028T 8281delC 8282delC 8283delC 8284delC 8285delC 8286delT 8287delC 8288delT 8289delA A8860G T8875C T9682C T9950C C11177T G11719A G13590A C14766T A15326G C15535T 16183delA C16184A T16189C T16217C T16519C                             |
| HG01259 | C64T A73G T146C A153G A235G A263G A663G A750G A1438G A1736G A2706G T4248C A4769G A4824G C7028T T7142C G8027A C8794T A8860G G10310A G11719A G12007A C12705T C14766T C15298T A15326G C16111T T16131C T16209C C16223T C16290T T16311C G16319A T16362C                                                                      |
| HG01271 | C64T A73G T146C A153G A235G A263G A663G A750G A1438G A1736G G1966A A2706G T4248C A4769G A4824G T6896C C7028T A7124G G8027A C8794T A8860G G11016A G11719A G12007A C12705T C14766T A15326G C16104T C16111T C16223T C16290T G16319A T16362C                                                                                |
| HG01272 | A73G T195C T204C T489C A750G A813G A1438G A2706G C3510T G3705A A4769G G6446A T6671C T6680C C7028T A8701G A8860G T9540C T9845C A10398G C10400T T10873C G11719A C12346T C12403T C12705T A12950C T14110C C14766T T14783C G15043A G15301A A15326G A15525G G16129A 16189delT C16223T T16249C T16311C T16359C T16519C C16527T |
| HG01274 | C64T A73G T146C A153G A235G A263G A663G A750G A1438G A1736G A2706G T4248C A4769G A4824G C7028T A7124G T7258C G8027A C8794T A8860G G11016A G11719A G12007A C12705T C14766T A15326G C16111T C16223T C16290T G16319A T16362C                                                                                               |
| HG01275 | C64T A73G T146C A153G A235G A263G A663G A750G A1438G A1736G A2706G T4248C A4769G A4824G T6286C C7028T A7124G G8027A C8794T A8860G T9098C G11016A G11719A G12007A C12705T C14766T A15326G C16111T C16223T C16290T G16319A T16362C                                                                                        |
| HG01277 | A73G A263G 498delC G499A A750G A827G A1438G A2706G A3547G A4122G A4123G A4769G G4820A T4977C C6473T C7028T 8281delC 8282delC 8283delC 8284delC 8285delC 8286delT 8287delC 8288delT 8289delA A8860G T8875C T9682C T9950C C11177T G11719A G13590A C14766T A15326G C15535T 16183delA C16184A T16189C T16217C T16519C       |
| HG01278 | A73G A263G 498delC G499A A750G A827G A1438G G2056A A2706G A3547G A4122N A4123G A4769G G4820A T4977C C6473T C7028T G7269A 8281delC 8282delC 8283delC 8284delC 8285delC 8286delT 8287delC 8288delT 8289delA A8860G T8875C T9682C T9950C C11177T G11719A G13590A C14766T A15326G                                           |

|         |                                                                                                                                                                                                                                                                                                                                              |
|---------|----------------------------------------------------------------------------------------------------------------------------------------------------------------------------------------------------------------------------------------------------------------------------------------------------------------------------------------------|
|         | C15535T T16189N T16217C T16519C                                                                                                                                                                                                                                                                                                              |
| HG01334 | A73G T146C T152C A263G T310N G709A A750G A1438G A1811G A2706G A3480G A4122G A4123G T4561C A4769G C7028T C7819T A8860G G9055A T9698C T9716C A10398G A10550G T11204C T11299C A11467G G11719A A12308G G12372A C12870T C14167T C14766T T14798C A15326G T16224C C16261T A16293G T16311C T16519C                                                   |
| HG01342 | C64T A73G T146C A153G A235G A263G 514delC 515delA A663G A750G A1438G A1736G A2706G T4248C A4769G A4824G C7028T G8027A A8056G C8794T A8860G G11719A G12007A C12705T C14766T A15326G C16111T C16223T C16239T C16290T G16319A T16362C T16519C                                                                                                   |
| HG01344 | A73G C150T A263G 498delC G499A A750G A827G A1438G A2706G A3547G A4769G G4820A T4977C C6473T C7028T 8281delC 8282delC 8283delC 8284delC 8285delC 8286delT 8287delC 8288delT 8289delA A8860G T8875C T9682C T9950C C11177T G11719A G13590A G13928C C14766T A15326G C15535T 16183delA C16184A T16189C T16217C T16519C                            |
| HG01345 | A73G C114T T146C T152C A263G G499A A750G A827G A1438G A2706G A3547G A4769G G4820A T4977C T5196C C6473T G6570T C7028T 8281delC 8282delC 8283delC 8284delC 8285delC 8286delT 8287delC 8288delT 8289delA G8545A A8860G T9950C C11177T G11719A A12770N G13590A C14766T G15323A A15326G C15535T T16086C 16183delA C16184A T16189C T16217C T16519C |
| HG01350 | C64T A73G T146C A153G A235G A263G T310N 514delC 515delA A663G A750G A1438G A1736G A2706G T4248C A4769G A4824G C7028T A7124G G8027A C8794T A8860G G11016A G11719A G12007A C12705T C14766T A15326G C16111T C16223T C16290T G16319A T16362C                                                                                                     |
| HG01351 | C64T A73G T146C A153G A235G A263G T310N 514delC 515delA A663G A750G A1438G A1736G A2706G T4248C A4769G A4824G C7028T A7124G G8027A C8794T A8860G G11016A G11719A G12007A C12705T C14766T A15326G C16111T C16223T C16290T G16319A T16362C                                                                                                     |
| HG01353 | A73G G143A A263G 498delC G499A A750G A827G A1438G A2706G A3547G A4122G A4123G A4769G G4820A T4977C C6473T C7028T 8281delC 8282delC 8283delC 8284delC 8285delC 8286delT 8287delC 8288delT 8289delA A8860G T8875C T9682C T9950C C11177T G11719A G13590A C14766T A15326G C15535T A16183C T16189C T16217C T16519C                                |
| HG01354 | C64T A73G T146C A153G A235G A263G 514delC 515delA A663G A750G A1438G A1736G A2706G T4248C A4769G A4824G T6286C C7028T A7124G G8027A C8794T A8860G T9098C G11016A G11719A G12007A C12705T C14766T A15326G C16111T C16223T C16290T G16319A T16362C                                                                                             |
| HG01356 | C64T A73G T146C A153G A235G A263G 310insC 514delC 515delA A663G A750G A1438G A1736G A2706G T4248C A4769G A4824G C7028T A7124G G7521A C7786T G8027A C8794T A8860G A9377G G11016A G11719A G12007A C12705T T12903C T14290C C14766T A15326G C16111T T16189C C16223T C16290T G16319A T16362C C16465T                                              |
| HG01357 | C64T A73G T146C A153G A235G A263G 310insC 514delC 515delA A663G                                                                                                                                                                                                                                                                              |

|         |                                                                                                                                                                                                                                                                                                                                                                                                    |
|---------|----------------------------------------------------------------------------------------------------------------------------------------------------------------------------------------------------------------------------------------------------------------------------------------------------------------------------------------------------------------------------------------------------|
|         | A750G A1438G A1736G A2706G T4082C T4248C A4769G A4824G C7028T A7124G G8027A C8794T A8860G A9626C C9893T G11016A G11690A G11719A G12007A C12705T C14766T A15326G C16111T C16223T C16290T G16319A T16362C                                                                                                                                                                                            |
| HG01359 | C64T A73G T146C A153G A235G A263G 514delC 515delA A663G A750G A1438G A1736G A2363N A2706G T4248C A4769G A4824G C7028T A7124G G7521A C7786T G8027A C8794T A8860G A9377G G11016A G11719A G12007A C12705T T12903C C14766T A15326G C16111T T16189C C16223T C16290T G16319A T16362C C16465T                                                                                                             |
| HG01360 | A73G A263G 498delC G499A A750G A827G A1438G A2706G A3547G A4122G A4123G A4769G G4820A T4977C C6473T C7028T 8281delC 8282delC 8283delC 8284delC 8285delC 8286delT 8287delC 8288delT 8289delA A8860G T8875C T9682C T9950C C11177T G11719A G11914A G13590A C14766T T14798N A15326G C15535T A16183C T16189C T16217C T16519C                                                                            |
| HG01365 | A73G C150T T152C A189G A200G G207A A263G A750G A1438G T2352C A2706G A4769G T6221C C6587T C7028T A8701G A8860G T9540C G9828A A10398G A10819G T10873C G11719A C12705T A14152G T14212C C14766T G15301A A15326G T15670C T15942C C16185T 16189delT C16223T C16264T C16327T                                                                                                                              |
| HG01366 | A73G G143A A263G 498delC G499A A750G A827G A1438G A2706G A3547G A4122G A4123G A4769G G4820A T4977C C6473T C7028T 8281delC 8282delC 8283delC 8284delC 8285delC 8286delT 8287delC 8288delT 8289delA A8860G T8875C T9682C T9950C C11177T G11719A G13590A C14766T A15326G C15535T A16183C T16189C T16217C T16519C                                                                                      |
| HG01374 | C64T A73G T146C A153G A235G A263G 514delC 515delA A663G A750G A1438G A1736G A2706G T4248C A4769G A4824G C7028T T7142C G8027A C8794T A8860G G10310A G11719A G12007A C12705T C14766T C15298T A15326G C16111T T16131C T16209C C16223T C16290T T16311C G16319A T16362C                                                                                                                                 |
| HG01375 | C64T A73G T146C A153G A235G A263G 514delC 515delA A663G A750G A1438G A1736G A2706G T4248C A4769G A4824G C7028T A7124G G8027A C8794T A8860G G11016A G11719A G12007A C12705T C14766T A15326G C16111T C16223T C16290T G16319A T16362C                                                                                                                                                                 |
| HG01377 | A73G A263G 310insC 498delC G499A 513insC 513insA A750G A827G A1438G A2706G A3547G A4122G A4123G A4769G G4820A T4977C C6473T C7028T 8281delC 8282delC 8283delC 8284delC 8285delC 8286delT 8287delC 8288delT 8289delA A8860G T8875C T9682C T9725C T9950C A10398G C11177T G11719A G13590A C14766T A15326G C15535T A16183C T16189C T16217C T16519C                                                     |
| HG01378 | A73G C151T T152C C182T C186A A189C T195C G247A A263G G316A G513A 514delC 515delA T629C A750G G769A T825A G1018A A1438G C2283T 2395delA A2706G G2758A T2885C C3210T A3434G C3594T G3666A A4104G T4755C A4769G A5951G T6071C T6221A G6917A C7028T A7146G C7256T T7389C G7521A G8027A G8251A C8417T C8468T C8655T A8701G A8860G A9072G T9540C A10398G G10586A G10688A T10810C T10873C C11302T A11641G |

|         |                                                                                                                                                                                                                                                                                                                                                                                                                                                                                                                                                                                                                                                                                                                 |
|---------|-----------------------------------------------------------------------------------------------------------------------------------------------------------------------------------------------------------------------------------------------------------------------------------------------------------------------------------------------------------------------------------------------------------------------------------------------------------------------------------------------------------------------------------------------------------------------------------------------------------------------------------------------------------------------------------------------------------------|
|         | G11719A A12400G C12542T C12705T A12810G A13105G A13485G C13506T<br>C13650T T13789C C13981T T14000A T14178C G14560A C14766T C14794T<br>C14911T A15226G A15326G T15905C C15978T T16017C G16129A A16163G<br>C16187T T16189C C16223T C16278T A16293G C16294T T16304C T16311C<br>C16360T                                                                                                                                                                                                                                                                                                                                                                                                                             |
| HG01383 | C64T A73G T146C A153G A235G A263G 310insC 514delC 515delA A663G<br>A750G A1438G A1736G A2706G T4248C A4769G A4824G C7028T A7124G<br>G8027A C8794T A8860G G11016A G11719A G12007A C12705T C14766T<br>A15326G C16111T C16223T C16290T G16319A T16362C                                                                                                                                                                                                                                                                                                                                                                                                                                                             |
| HG01384 | C64T A73G T146C A153G A235G A263G 310insC 514delC 515delA A663G<br>A750G A1438G A1736G A2706G T4248C A4769G A4824G C7028T A7124G<br>G8027A C8794T A8860G G11016A G11719A G12007A C12705T C14766T<br>A15326G C16111T C16223T C16290T G16319A T16362C                                                                                                                                                                                                                                                                                                                                                                                                                                                             |
| HG01389 | A73G C151T T152C C182T C186A A189C G247A A263G G316A 514delC<br>515delA A750G G769A A783G T825A G1018A A1438G 2395delA A2706G<br>G2758A T2885C A3105G C3594T G3666A A4104G A4769G T5291C A5951G<br>T6071C T6221A G6260A G6917A C7028T A7146G C7256T T7389C G7498A<br>G7521A G7789A G8027A C8468T C8655T T8668C A8701G A8860G A9072G<br>T9540C G9966A A10398G G10586A G10688A T10810C T10873C C11302T<br>G11719A C12019T G12501A G12684A C12705T A12810G A13105G A13485G<br>C13506T T13577C C13650T T13789C A13866G T14000A T14178C G14560A<br>C14766T C14911T A15226G A15326G T15905C C15978T G16129A 16182delA<br>16183delA T16189C A16215G C16223T T16231C C16278T C16294T T16311C<br>C16355T C16360T T16519C |
| HG01390 | A73G A263G T310N 498delC G499A A750G A827G A1438G A2706G A3547G<br>A4122G A4123G A4769G G4820A T4977C C6473T C7028T 8281delC 8282delC<br>8283delC 8284delC 8285delC 8286delT 8287delC 8288delT 8289delA A8860G<br>T8875C T9682C T9950C C11177T G11719A G13590A C14766T A15326G<br>C15535T A16183C T16189C T16217C T16519C                                                                                                                                                                                                                                                                                                                                                                                       |
| HG01437 | A73G T152C A215G A263G G499A A750G A827G A1438G A2706G C3351T<br>A3547G A4769G G4820A T4977C C6473T G6755A C7028T C7808T 8281delC<br>8282delC 8283delC 8284delC 8285delC 8286delT 8287delC 8288delT 8289delA<br>G8573A A8860G T9950C C11177T G11719A A12366G G13590A T14182C<br>C14482T C14766T A15326G C15535T A16182C A16183C T16189C T16217C<br>T16519C                                                                                                                                                                                                                                                                                                                                                      |
| HG01440 | C64T A73G T146C A153G A235G A263G 514delC 515delA A663G A750G<br>A1438G A1736G A2706G T4248C A4769G A4824G C7028T G8027A C8794T<br>A8860G G9055A A9377G A9473C G9591A G11719A G12007A C12705T<br>A14687G C14766T T15074C A15326G C16111T G16213A C16223T C16290T<br>G16319A T16362C                                                                                                                                                                                                                                                                                                                                                                                                                             |
| HG01441 | A73G T152C A263G 310insC T489C A750G T1420C A1438G C2092T A2706G<br>G3010A A3203G G3834A A4769G C4883T C5178A C7028T C8414T A8701G<br>A8860G T9540C T9615C A10398G C10400T T10873C G11719A C12705T<br>A14280G C14668T C14766T T14783C G15043A G15301A A15326G T16092C                                                                                                                                                                                                                                                                                                                                                                                                                                           |



|         |                                                                                                                                                                                                                                                                                                                                                                                                          |
|---------|----------------------------------------------------------------------------------------------------------------------------------------------------------------------------------------------------------------------------------------------------------------------------------------------------------------------------------------------------------------------------------------------------------|
|         | C16142T C16223T T16311C T16325C T16362C T16519C                                                                                                                                                                                                                                                                                                                                                          |
| HG01455 | A73G A263G 498delC G499A A750G A827G A1438G A2706G A3547G A4122G A4123G A4769G G4820A T4977C C6473T C7028T 8281delC 8282delC 8283delC 8284delC 8285delC 8286delT 8287delC 8288delT 8289delA A8860G T8875C T9682C T9950C C11177T G11719A C13038T G13590A C14766T A15326G C15535T A16183C T16189C T16217C T16519C                                                                                          |
| HG01456 | A73G C150T T195C C198T A263G 310insC A750G A1438G T2352C A2706G A4310G A4769G T4823C T5492C T6413C C7028T A8701G A8860G T9540C A10398G A10819G T10873C G11719A C12705T A13105G T14212C A14750G C14766T G14869A G14905A G15301A A15326G T16209C C16223T C16320T T16519C                                                                                                                                   |
| HG01461 | A73G 248delA A263G 286delA 287delA T489C A750G A1438G G1888A A2706G A3140G T3552A G3705A A4715G A4769G T6815C T7022A C7028T C7196A G8584A A8701G A8860G T9540C A9545G A10398G C10400T T10873C A11011G G11719A G11914A C12705T A13263G T14318C C14766T T14783C G15043A G15301A A15326G A15487T T15670C G15930A C16223T A16265G T16298C G16319A T16325C C16327T T16362C T16519C                            |
| HG01462 | C18T C26T G35A G47A A73G C194T 248delA A263G 286delA 287delA T489C 514delC 515delA A750G A1438G A2706G A3511G T3552A A4562G A4715G A4769G C7028T C7196A G7697A G8557A G8584A A8701G A8860G T9540C A9545G C10211T A10398G C10400T T10873C G11719A G11914A T12188A C12705T C12973T A13263G T14318C C14443T C14766T T14783C G15043A G15301A A15326G A15487T A16051G C16223T C16295T T16298C T16325C C16327T |
| HG01465 | A73G A263G 498delC G499A A750G A827G A1438G G2056A A2706G A3547G A4122G A4123G A4769G G4820A T4977C C6473T C7028T G7269A 8281delC 8282delC 8283delC 8284delC 8285delC 8286delT 8287delC 8288delT 8289delA A8860G T8875C T9682C T9950C C11177T G11719A G13590A C14766T A15326G C15535T 16182delA 16183delA T16189C T16217C T16519C                                                                        |
| HG01488 | A73G A263G T310N 498delC G499A A750G A827G A1438G G2056A A2706G A3547G A4122G A4123G A4769G G4820A T4977C C6473T C7028T G7269A 8281delC 8282delC 8283delC 8284delC 8285delC 8286delT 8287delC 8288delT 8289delA A8860G T8875C T9682C T9950C C11177T G11719A A11884G G13590A C14766T A15326G C15535T 16182delA 16183delA T16189C T16217C T16519C                                                          |
| HG01489 | C150T T239C A263G A750G A1438G G3915A A4727G A4769G G7805A A8860G G9380A T11253C A15326G T16362C A16482G                                                                                                                                                                                                                                                                                                 |
| HG01491 | A73G A263G 498delC G499A A750G A827G A1438G A2706G A3547G A4122G A4123G A4769G G4820A T4977C C6473T C7028T 8281delC 8282delC 8283delC 8284delC 8285delC 8286delT 8287delC 8288delT 8289delA A8860G T8875C T9682C T9950C C11177T G11719A G13590A C14766T A15326G C15535T A16183C T16189C T16217C T16519C                                                                                                  |
| HG01492 | C64T A73G A93G T146C A153G A235G A263G 514delC 515delA A663G A750G A1438G A1736G A2706G C3516T T4248C A4769G A4824G C7028T G8027A                                                                                                                                                                                                                                                                        |

|         |                                                                                                                                                                                                                                                                                                                                       |
|---------|---------------------------------------------------------------------------------------------------------------------------------------------------------------------------------------------------------------------------------------------------------------------------------------------------------------------------------------|
|         | C8794T A8860G T11152C G11719A G12007A C12705T C14142A C14766T A15326G C16111T T16126C C16223T C16290T T16311C G16319A T16362C                                                                                                                                                                                                         |
| HG01494 | A73G A263G 498delC G499A A750G A827G A1438G G2056A A2706G A3547G A4122G A4123G A4769G G4820A T4977C C6473T C7028T G7269A 8281delC 8282delC 8283delC 8284delC 8285delC 8286delT 8287delC 8288delT 8289delA A8860G T8875C T9682C T9950C C11177T G11719A G13590A C14766T A15326G C15535T A16182C A16183C T16189C T16217C T16519C         |
| HG01495 | A73G T146C A153G A235G T485C 514delC 515delA A663G A750G A1438G A1736G A2706G T4248C A4769G A4824G T6221C C7028T A7124G C7888T G8027A A8347G A8706G C8794T A8860G G8896A G11016A G11719A G12007A C12705T T14353C C14766T A15326G C16111T C16187T C16223T C16290T G16319A T16362C                                                      |
| HG01497 | A73G A263G 498delC G499A A750G A827G A1438G A2706G A3547G A4122G A4123G A4769G G4820A T4977C C6473T C7028T 8281delC 8282delC 8283delC 8284delC 8285delC 8286delT 8287delC 8288delT 8289delA A8860G T8875C T9682C T9725C T9950C A10398G C11177T G11225A G11719A G13590A C14766T A15326G C15535T A16183C T16189C T16217C T16519C        |
| HG01498 | A73G A263G 310delT 498delC G499A A750G A827G A1438G G2056A A2706G A3547G A4122G A4123G A4769G G4820A T4977C C6473T C7028T G7269A 8281delC 8282delC 8283delC 8284delC 8285delC 8286delT 8287delC 8288delT 8289delA A8860G T8875C T9682C T9950C C11177T G11719A G13590A C14766T A15326G C15535T A16182C A16183C T16189C T16217C T16519C |
| HG01515 | A93G A263G 310insC A750G A1438G A4769G 5894insC A8860G T10410C T14470C A15326G A16051G T16189C T16311C T16519C                                                                                                                                                                                                                        |
| HG01516 | A73G A263G A750G A1438G T4248C A4769G T6776C A8860G G11914A A15326G T16519C                                                                                                                                                                                                                                                           |
| HG01518 | A73G G185A G228A A263G C295T C462T T489C A750G A1438G A2706G G3010A T4216C A4769G C7028T A8860G A9389G T9836N A10398G A11251G G11719A A12612G G13708A C13934T C14766T T14798C A15326G C15452A T15512N C16069T T16126C                                                                                                                 |
| HG01519 | T152C A263G A750G A1438G G3010A A4065G A4769G T4823C A8860G A10700G A13105G A15326G T16189C T16249C T16356C T16519C                                                                                                                                                                                                                   |
| HG01521 | A263G A750G A1438G G3010A A4769G G7498N A8860G T9722C A10316G G11351N A12373G A15326G T16217C T16311C T16519C                                                                                                                                                                                                                         |
| HG01522 | A263G 310insC G709A A750G A1438G G3358A G3915A A4769G C6296T A8860G C14812T A15326G G16129A T16519C                                                                                                                                                                                                                                   |
| HG01550 | A73G A263G 498delC G499A A750G A827G A1438G G2056A A2706G A3547G A4122G A4123G A4769G G4820A T4977C C6473T C7028T G7269A 8281delC 8282delC 8283delC 8284delC 8285delC 8286delT 8287delC 8288delT 8289delA A8860G T8875C T9682C T9950C C11177T G11719A G13590A C14766T A15326G C15535T 16182delA A16183C T16189C T16217C T16519C       |
| HG01551 | A73G C150T A263G 514delC 515delA A1438G T2352C A2706G T2863C G3915A A4769G G5262A A5584G T6827C C7028T A8701G A8860G T9540C A10398G A10819G T10873C C11257T G11719A C12690T C12705T C13749T T14212C                                                                                                                                   |

|         |                                                                                                                                                                                                                                                                                    |
|---------|------------------------------------------------------------------------------------------------------------------------------------------------------------------------------------------------------------------------------------------------------------------------------------|
|         | C14766T G15301A A15326G A16051G C16223T C16264T T16519C                                                                                                                                                                                                                            |
| HG01617 | A73G A263G C497T A750G T1189C A1438G A1811G A2706G A3480G A4769G G5773A C7028T A8860G G9055A T9698C A10398G A10550G T11025C T11299C A11467G G11719A A12308G G12372A C14167T C14766T T14798C A15326G T16224C T16311C T16519C                                                        |
| HG01618 | A73G T195C A263G G709A A750G G930A A1438G G1888A A2706G T4216C A4769G A4917G G5147A C7028T G8697A A8860G A10398G T10463C A11251G G11719A A11812G G13368A A14233G C14766T G14905A A15326G C15452A A15607G G15928A A16051G T16126C A16146G C16294T T16304C T16519C                   |
| HG01619 | G185A A263G C456T A750G A1438G T4336C A4769G G8557A A8860G G9010A T14826C C15175T A15326G C16193T T16304C                                                                                                                                                                          |
| HG01620 | T72C A263G T480C A750G A1438G A2706G G4580A A4769G C7028T A8860G C12813T C14770T A15326G C15904T T16298C                                                                                                                                                                           |
| HG01623 | T72C T195C A263G A750G A1438G A2706G G3316A A4769G C7028T A7784N A8860G C9086T T10882C C11335T C14860T A15326G T16298C                                                                                                                                                             |
| HG01624 | A263G A750G A1438G A4769G G7859A A8860G G9380A G9612A C13938T G14323A A15326G T16519C                                                                                                                                                                                              |
| HG01625 | A73G C285T A385G A750G A1438G C2218T A2706G 3158insT G3591A T4561C A4769G G4991A G6026A C7028T T7581C C8468T A8860G A11467G G11719A A12308G G12372A T12879C A13104G A13422G A14070G G14364A C14766T G15148A A15326G A15954C T16086C 16183delA C16184A T16189C T16249C              |
| HG01626 | A73G A263G G709A A750G A1438G G1888A T2141C A2706G T3350C T4216C A4769G A4917G C7028T G8697A A8860G T9117C T10463C A11251G G11719A A11812G C12741T G13368A A14233G A14687G C14766T G14905A C15025T A15326G C15452A A15607G G15928A T16126C C16218T C16294T C16296T T16324C T16519C |
| NA06984 | A73G A263G A750G A1438G T1700C A2706G T3197C A4769G T5495C C7028T A7158G A8860G G9477A A11467G G11719A A12308G G12372A T12441C C13494T T13617C C14766T A14793G A15218G A15326G A15924G C16192T C16256T C16270T A16399G T16519C                                                     |
| NA06985 | A73G T195C A263G G499A A750G A1438G A1811G T2083C A2706G A3672G T4646C A4769G T5999C A6047G C7028T T7705C A8642G A8860G C11332T T11339C A11467G A11488G G11719A T12297C A12308G G12372A C14620T C14766T A15326G T15693C C15789T T16356C T16362C T16519C                            |
| NA06986 | A73G A263G C497T A750G T1189C A1438G A1811G A2706G A3480G C4748T A4769G G5773A C7028T A7804G T8310C A8860G G9055A T9698C A10398G A10550G T11025C T11299C A11467G G11719A A12308G G12372A G13368A C14167T C14766T T14798C A15326G T16189C T16224C T16311C T16519C                   |
| NA06989 | A73G C150T A263G 310insC A750G A896G A1438G C1721T A2581G A2706G T3197C A4732G A4769G T6481C C7028T A7768G A8860G G9477A A11467G G11719A A12308G G12372A G12406A T13617C A13637G T14182C C14766T A15326G T15511C C16192T T16311C                                                   |
| NA06994 | A73G C150T A263G A750G A896G A1438G C1721T A2706G T3197C A4732G C7028T A7768G G9477A A11467G G11719A A12308G G12372A T13617C                                                                                                                                                       |

|         |                                                                                                                                                                                                                                                                                                              |
|---------|--------------------------------------------------------------------------------------------------------------------------------------------------------------------------------------------------------------------------------------------------------------------------------------------------------------|
|         | A13637G T14182C C14766T A15326G T15511C C16192T T16311C                                                                                                                                                                                                                                                      |
| NA07000 | A73G A263G G709A A750G G930A A1438G G1888A A2706G T4216C A4769G<br>A4917G G5147A C7028T T7230C G8697A A8860G T10463C A11251G G11719A<br>A11812G G13368A A14233G C14766T G14905A A15326G T15449C C15452A<br>A15607G G15928A T16126C C16294T C16296T T16304C T16519C                                           |
| NA07037 | A73G A263G G709A A750G A1438G G1888A A2706G G3010A C3867T T4216C<br>A4769G A4917G C7028T G8697A A8860G A10376G T10463C A11251G G11719A<br>C12531T C12633A G13368A C14766T G14905A A15326G C15452A A15607G<br>G15928A T16126C A16163G C16186T 16187delC T16189C C16294T T16519C                               |
| NA07048 | A263G A750G G951A A8860G A15326G C16354T                                                                                                                                                                                                                                                                     |
| NA07051 | C151T T152C C198T A263G A750G A1438G G1719A T2083C A4769G G8269A<br>A8860G A15326G G16145A C16256T T16311C A16343G T16519C                                                                                                                                                                                   |
| NA07056 | A73G T119C A189G T195C T204C G207A A227G A263G 310insC G709A A750G<br>T1243C A1438G A2706G A3505G A4769G G5046A G5460A C7028T C7864T<br>G8251A A8860G G8994A T11204C C11674T G11719A A11947G T12414C<br>A12648G C12705T A14148G C14766T A15326G G15884C C16184T C16223T<br>C16292T T16519C                   |
| NA07345 | A263G A750G A1438G G3010A A4769G A8860G A9545G A13470G A15326G<br>G15773A T16519C                                                                                                                                                                                                                            |
| NA07346 | T146C C8182T G16129A                                                                                                                                                                                                                                                                                         |
| NA07347 | A263G T477C A750G A1438G G3010A A4769G G5979A A8860G A15326G                                                                                                                                                                                                                                                 |
| NA07357 | A73G A183G A263G A750G A1438G A2706G T3197C A4769G C7028T A7403G<br>A8860G G9477A C10544T A10792G A11467G G11719A A12308G G12372A<br>T13617C G13708A C14766T A14793G A15218G A15326G C16192T C16256T<br>C16270T C16286T C16320T A16399G                                                                      |
| NA10847 | A263G 310insC T408A A750G A1438G T3345C A4769G T6776C C8841T A8860G<br>T9117C G10685A A15326G T16519C                                                                                                                                                                                                        |
| NA10851 | T72C A263G T593C A750G A1438G A2706G G4580A A4769G C7028T A8860G<br>C12774T A15326G C15904T T16298C C16301T T16311C                                                                                                                                                                                          |
| NA11829 | A73G A263G G709A A750G A1438G G1888A A2706G T2850C T4216C T4639C<br>A4769G A4917G T6671C T7022C C7028T G8697A A8860G C8922T T10463C<br>C10581T A11251G G11719A A11812G G13368A T13965C A14053G A14233G<br>A14687G C14766T G14905A A15326G C15452A A15607G G15928A T16126C<br>C16256T C16294T C16296T T16519C |
| NA11830 | A73G C150T G207A A263G A750G A896G A1438G C1721T A2706G T3197C<br>A4732G A4769G C7028T A7768G A8860G G9477A A11467G G11719A A12308G<br>G12372A T13617C A13637G A13911G T14182C C14766T A15326G T15511C<br>C16239T T16311C                                                                                    |
| NA11831 | A263G C456T A750G A1438G A4769G A8860G A13327T T14180C A15326G<br>C16239T                                                                                                                                                                                                                                    |
| NA11832 | A263G A750G A1201N G6261N T8843C A8860G G13708A A15326G T16519C                                                                                                                                                                                                                                              |
| NA11840 | A73G T146C T152C A263G 514delC 515delA A750G A1438G C3992T A4024G<br>A4769G T5004C G8269A A8832G A8860G G9123A A10044G C14365T A14582G<br>A15326G                                                                                                                                                            |

|         |                                                                                                                                                                                                                                                                                                           |
|---------|-----------------------------------------------------------------------------------------------------------------------------------------------------------------------------------------------------------------------------------------------------------------------------------------------------------|
| NA11843 | A73G T146C G185A A188G G228A A263G C295T 310insC C462T T489C A750G A1438G A2706G G3010A T4216C A4769G C7028T A8860G G8865A A10398G G10685A A11251G G11719A A12612G T13281C G13708A A13933G C14766T T14798C A15326G C15452A C16069T T16126C G16526A                                                        |
| NA11881 | A257G A263G T477C A750G A1438G G3010A A4769G T8473C A8860G T9899C A15326G A16183C T16189C T16362C T16519C                                                                                                                                                                                                 |
| NA11892 | A73G T152C A263G A750G T1189C A1438G G1719A A1811G A2706G A3480G A4769G G5913A C7028T A8860G G9055A T9698C G9962A A10289G A10398G A10550G T10861C T11299C A11467G G11719A A11923G A12308G G12372A C13967T C14167T C14766T T14798C G15257A A15326G C15946T T16093C T16224C T16311C G16319A A16463G T16519C |
| NA11893 | A263G A750G A1438G A2706G G4580A A4769G G6734A C7028T A8860G A14140G A15326G C15904T C16290T T16298C T16519C                                                                                                                                                                                              |
| NA11894 | A73G A263G G709A A750G A1438G G1888A A2706G C3867T T4216C A4769G A4917G C7028T G8697A A8860G A10376G T10463C A11251G G11719A C12633A G13368A C14766T G14905A A15326G C15452A A15607G G15928A T16126C A16163G C16186T 16187delC T16189C C16294T T16519C                                                    |
| NA11918 | A263G C575T A750G A751G G951A A8701G A8860G A15326G C16176T C16354T                                                                                                                                                                                                                                       |
| NA11919 | A263G T477C A750G A1438G G3010A A4769G A8860G A9150G A15326G T16263C T16519C                                                                                                                                                                                                                              |
| NA11920 | A73G A263G A750G A1438G G3010A T4639C T4679C A4769G T6365C A8860G G8989A G10993A A15326G A16162G T16209C T16519C                                                                                                                                                                                          |
| NA11930 | T146C A257G A263G T477C A750G A1438G G1969A G3010A A4769G T8473C A8860G T10667C A15326G C16176T A16219G T16519C                                                                                                                                                                                           |
| NA11931 | T152C G228A A263G A750G A1438G A4065G A4769G T6776C A8860G T13404C C14125T A15326G C16239G T16519C                                                                                                                                                                                                        |
| NA11932 | T72C A93G T195C C198T A263G C518T A750G A1438G A2706G A4769G C7028T A8860G A14582G A15326G T16298C                                                                                                                                                                                                        |
| NA11933 | A73G A189G C194T T195C T204C G207A A263G T650C G709A A750G T1243C A1438G A2706G A3505G A4769G G5046A G5460A T6320A C6528T C7028T A7673G G8251A A8860G G8994A A10097G T10410C C11674T G11719A A11947G T12414C C12705T C14766T T14968N A15326G A15775G G15884C C16223T C16292T T16362C T16519C              |
| NA11992 | A73G A263G 514delC 515delA A750G A1438G A2706G T3197C C3750T A4769G C7028T A7843G C7978T T8104C A8860G T9148C G9477A C11107T A11467G G11719A A12308G G12372A T13617C T14577G C14766T A14793G A15326G C16256T C16270T G16526A                                                                              |
| NA11993 | A263G C456T 514delC 515delA A750G A1438G T4336C A4769G A5621N A8860G G11719A A15326G C15833T T16304C                                                                                                                                                                                                      |
| NA11994 | A73G T152C C194N A263G G709A A750G G930A A1438G G1888A A2706G T4216C A4769G A4917G G5147A C7028T G8697A A8860G A9254G T10463C A11251G G11719A A11812G G13368A A14233G C14766T G14905A A15326G C15452A A15607G G15928A C16104T T16126C C16294T T16304C T16519C                                             |

|         |                                                                                                                                                                                                                                                                  |
|---------|------------------------------------------------------------------------------------------------------------------------------------------------------------------------------------------------------------------------------------------------------------------|
| NA11995 | G143A T195C A263G A750G T961G A1438G A4769G C7906T T8448C A8860G C8898T T9316C G13759A T14386C A15326G C16278T A16293G T16311C                                                                                                                                   |
| NA12003 | A73G A263G G709A A750G G930A A1438G G1888A A2706G T4216C A4769G A4917G G5147A C7028T G8697A A8860G T10463C A11251G G11719A A11812G G13368A G14016A A14233G C14766T G14905A A15326G C15452A A15607G A15805G G15928A T16126C C16294T C16296T T16304C T16519C       |
| NA12004 | T152C A263G A750G A1438G A4769G T6776C A8860G A15326G G16274A T16519C                                                                                                                                                                                            |
| NA12005 | A73G T146C T152C A263G 310insC G709A A750G A1438G A1811G A2706G A3480G T4561C A4769G C7028T A8860G G9055A T9698C T9716C A10550G T11299C A11467G G11719A A12308G G12372A C14167T C14766T T14798C A15326G T16224C C16256T T16311C T16519C                          |
| NA12006 | T146C T195C A263G C456T A750G A1438G A4769G G5177N G5471A A8860G G9452A A14497G A15326G T16304C                                                                                                                                                                  |
| NA12043 | A73G T152C A263G G709A A750G A1438G G1888A A2706G T4216C A4769G A4917G C6053T C6368T C7028T G8697A A8860G T9899C T10463C A11251G G11719A C12633A G13368A C14766T G14905A A15326G C15452A A15607G G15928A T16126C A16163G A16183C T16189C C16294T T16519C         |
| NA12044 | A73G G185A G228A A263G C295T C462T T489C A750G A1438G G3010A T4216C A4769G C7028T A8860G A10398G A11251G G11719A T11929C A12612G G13708A C13934T C14766T T14798C A15326G C15452A C16069T T16126C T16172C C16222T                                                 |
| NA12045 | A263G T266C A750G A1438G A4769G A8860G A13105G G13708A G14364A A15326G T16519C                                                                                                                                                                                   |
| NA12046 | A73G A263G G709A A750G G930A A1438G G1888A A2706G T4216C T4695C A4769G A4917G G5147A G6032A C7028T G8697A A8860G T10463C A11251G G11719A A11812G G13368A G14016A A14233G C14766T G14905A A15326G C15452A A15607G G15928A T16126C C16294T C16296T T16304C T16519C |
| NA12058 | T152C T195C A263G C549T A750G A1438G A2706G A3397G T4100C A4769G C7028T A8860G A15326G C16111T T16189C C16291T T16311C                                                                                                                                           |
| NA12144 | A263G A750G A1438G G3010A A4769G G5460A A8512G A8860G C14902T A15326G T16172C A16312G T16519C                                                                                                                                                                    |
| NA12154 | A73G G185A G228A A263G C295T G316A C462T T489C A750G A1438G T2387C A2706G G3010A T4216C A4769G A5198G C7028T A8860G C10192T A10398G A10598G A11251G G11719A A12612G G13708A C14766T T14798C A15326G C15452A C16069T T16126C                                      |
| NA12155 | C114T T146C T152C T195C A263G G709A A750G A1438G A4769G T5093C A8860G A10398N C11623T A13101C G13711A T13752C A15326G A16258G T16263C T16288C T16362C                                                                                                            |
| NA12156 | A73G T146C T152C T195N A263G G499A A750G A1438G A1811G A2706G T4646C A4769G G5262A T5999C A6047G C7028T T7705C A8860G C11332T T11339C A11467G G11719A A12308G G12372A A13528G C13565T C14620T C14766T A15326G T15693C T16356C T16519C                            |
| NA12234 | A73G G185A G228A A263G C295T C462T T482C T489C A750G A1438G                                                                                                                                                                                                      |

|         |                                                                                                                                                                                                                                                                                                                                                                      |
|---------|----------------------------------------------------------------------------------------------------------------------------------------------------------------------------------------------------------------------------------------------------------------------------------------------------------------------------------------------------------------------|
|         | A1836G A2706G G3010A T3394C T4216C A4769G C7028T A8860G A10073T<br>A10398G T10454C A11251G G11719A A12612G G13708A C14766T T14798C<br>A15326G C15452A C16069T T16126C T16368C                                                                                                                                                                                        |
| NA12249 | A263G 310insC T477C A750G A1438G G3010A A4769G T6956C A8860G<br>A9150G A15326G T16263C T16519C                                                                                                                                                                                                                                                                       |
| NA12272 | A263G C456T 514delC 515delA A750G A1438G T4336C A4769G G8573A<br>A8860G A15326G A15638T C15833T T16093C T16304C T16311C                                                                                                                                                                                                                                              |
| NA12273 | A73G C150T T152C T195C A215G A263G C295T T319C T489C G513A A750G<br>A1438G A2706G T4216C A4769G C7028T C7476T G7789A A8860G A10398G<br>A10499G A11251G G11377A G11719A A12612G G13708A A13722G A14133G<br>C14766T G15257A A15326G C15452A C16069T G16145A T16231C C16261T                                                                                            |
| NA12275 | A263G A750G A1438G C2259T A4745G A4769G A8860G C13680T C14872T<br>A15326G T15784C                                                                                                                                                                                                                                                                                    |
| NA12282 | A73G C242T A263G C295T C462T T489C A750G A929G A1438G T2158C<br>A2706G G3010A T4216C A4769G G5460A C5463T T5794C T6911C C7028T<br>G8269A G8557A A8860G A10398G A11251G G11719A G12007A A12612G<br>G13708A T13879C C14766T G15153A A15326G C15452A C16069T T16126C<br>G16145A T16172C C16192T C16222T C16261T                                                         |
| NA12283 | A263G C510T A750G A1438G A4769G T6293C T6776C A8860G T10410C<br>C11956T T15204C A15326G T16519C                                                                                                                                                                                                                                                                      |
| NA12286 | A183G A263G A750G T921C A1438G A4769G A8860G A15326G C16278T<br>T16519C                                                                                                                                                                                                                                                                                              |
| NA12287 | A73G T152C T217C A263G C340T A508G 513insC 513insA A750G G988A<br>A1438G A1811G A2706G 3229insA A3720G A4769G A5390G T5426C 5894insC<br>5894insC C6045T T6152C C6644T C7028T A8860G A10876G A11467G G11719A<br>A12308G G12372A T13020C T13734C C14766T A15052G A15326G C15661T<br>A15907G A16051G G16129C A16182C A16183C T16189C C16223T C16256T<br>T16362C C16366N |
| NA12340 | T152C A263G 310insC A750G A1438G A4769G G8592A T8681C A8860G<br>C10394T A14587C A15326G T16519C                                                                                                                                                                                                                                                                      |
| NA12341 | A263G T310C A750G A1438G G3010A A4769G G5460A A8512G A8860G<br>A9531G C14902T A15326G T16519C                                                                                                                                                                                                                                                                        |
| NA12342 | A73G T199C T204C T250C A263G 573insN A750G A1438G G1664A G1719A<br>A2706G A3615G A4529T A4769G T5074C C7028T G8251A A8742G A8860G<br>T10034C G10098A T10238C A10398G G11719A G12501A C12705T A13780G<br>A14233G C14766T G15043A A15326G A15924G G16129A C16148T C16223T<br>A16289G G16391A T16519C                                                                   |
| NA12347 | A73G T146C T152C T217C A263G C340T T489C A508G A750G A1438G A1811G<br>A2706G A3720G A4769G A5390G T5426C C6045T T6152C C7028T G8155A<br>A8860G T9101C A10876G A11467G G11719A A12308G A12358G G12372A<br>T13020C T13734C C14356T C14766T A15326G T15519C A15907G A16051G<br>G16129C A16182C A16183C T16189C T16311C T16362C T16519C                                  |
| NA12348 | A73G T204C A263G A750G A1438G A2706G T3197C A3198G A4745T A4769G<br>A5894G C7028T 8281delC 8282delC 8283delC 8284delC 8285delC 8286delT                                                                                                                                                                                                                              |

|         |                                                                                                                                                                                                                                                                                                                                                                                           |
|---------|-------------------------------------------------------------------------------------------------------------------------------------------------------------------------------------------------------------------------------------------------------------------------------------------------------------------------------------------------------------------------------------------|
|         | 8287delC 8288delT 8289delA A8860G G8994A G9477A A11467G G11719A A12308G G12372A T13617C C14766T A14793G A15218G A15326G C16192T C16256T C16270T A16399G                                                                                                                                                                                                                                   |
| NA12383 | T72C A263G A750G A1438G A2706G G4580A A4769G C7028T A8860G A15326G C15904T T16298C C16301T                                                                                                                                                                                                                                                                                                |
| NA12399 | A263G T477C A750G A1438G T1824C G3010A T3784C A4769G A8860G A9007G A9150G G9380A A15326G T16263C T16519C                                                                                                                                                                                                                                                                                  |
| NA12400 | A73G T119C A189G T195C T204C G207A A263G G709A A750G T1243C A1438G A2706G A3505G A4769G G5046A G5460A C7028T C7864T A8170G G8251A A8860G G8994A T11204C C11674T G11719A A11947G T12414C A12648G C12705T A13611G G13928C A14148G C14766T A15326G G15884C C16184T C16223T C16292T T16519C                                                                                                   |
| NA12413 | A73G A111C T152C A189G C194T T204C G207A A263G G709A A750G T1243C A1438G A2706G A3505G T3866C T4363C A4769G G5046A G5460A T5492C G6267A C6528T C7028T G8251A A8860G G8994A A10097G T10410C C11674T G11719A A11947G T12414C C12705T C14766T A15326G A15775G G15884C C16223T C16292T C16355T T16362C T16519C                                                                                |
| NA12414 | A73G C150T T152C A263G C295T T489C A750G A1438G A2706G T4216C A4769G C5633T C7028T C7476T A8860G G10172A A10398G T10966C A11251G G11719A A12612G G13708A C14766T G15257A A15326G C15452A G15812A C16069T T16126C C16193T C16278T                                                                                                                                                          |
| NA12489 | C150T T152C A263G A750G A1438G A2706G A4769G G5746A C7028T A8860G G13368A A15326G C16234T T16311C                                                                                                                                                                                                                                                                                         |
| NA12546 | T152C A263G C456T A750G A1438G T3027C T4336C A4769G A5319G A8563G A8860G A15326G T16304C                                                                                                                                                                                                                                                                                                  |
| NA12716 | A215G A263G A750G A1438G G3010A A4012G A4769G T8843C A8860G G11696A A15326G G15553A T16311C T16519C                                                                                                                                                                                                                                                                                       |
| NA12717 | A263G 310insC A750G A1438G G3010A A3796G A4769G A8860G A15326G T16189C T16519C                                                                                                                                                                                                                                                                                                            |
| NA12718 | A73G A263G A750G A1438G A2706G T3197C A4769G A5372G G6516A C7028T T8093C A8860G G9477A A9667G A11467G G11719A A12308G G12372A T13617C A14071G C14766T A14793G A15218G A15326G C16192T C16256T C16270T C16278T C16291T A16399G                                                                                                                                                             |
| NA12748 | A263G T477C A750G A1438G G3010A A4769G A8860G A9150G A15326G T16263C T16519C                                                                                                                                                                                                                                                                                                              |
| NA12749 | T152C A263G A750G G1393A A1438G G1719A A4769G A4793G C8002T A8860G T10931C A15326G C16261T T16519C                                                                                                                                                                                                                                                                                        |
| NA12750 | A73G T195C A263G 310insC G709A A750G A1438G G1888A A2706G T4216C A4769G A4917G T5277C T5426C C6489A C7028T 8281delC 8282delC 8283delC 8284delC 8285delC 8286delT 8287delC 8288delT 8289delA G8697A A8860G T10463C A11251G G11719A A11812G G13368A T14020C A14233G C14766T G14905A C15028A G15043A A15326G C15452A A15607G G15928A T16126C A16182C A16183C T16189C C16294T T16298C T16519C |
| NA12751 | A73G A263G 573insN A750G A1438G T1700C A2706G T3197C A4769G A6752G                                                                                                                                                                                                                                                                                                                        |



|         |                                                                                                                                                                                                                                                                                    |
|---------|------------------------------------------------------------------------------------------------------------------------------------------------------------------------------------------------------------------------------------------------------------------------------------|
|         | C7028T A8860G G9477A T10915C A11467G G11719A A12308G C12346T<br>G12372A A12812G A13105G C13515T T13617C C14766T A14793G A15218G<br>A15326G C16256T C16270T T16311C A16399G                                                                                                         |
| NA12760 | T152C A263G C340T C456N A750G A1438G 3229insA T4336C A4769G A5319G<br>A6408G A8563G A8860G A15326G T16304C                                                                                                                                                                         |
| NA12761 | A73G C150T T152C A189G T195C A263G A750G A1438G A2706G T3197C<br>A3511T A4769G A5656G C7028T A7768G A8860G G9477A A11467G G11719A<br>A12308G G12372A G13558N T13617C T14182C C14766T A15122G A15326G<br>T16172C T16189C C16270T G16274A T16311C C16465T T16519C                    |
| NA12762 | T146C T195C A263G G709A A750G A1438G A4769G A8860G G9196A A13101C<br>A15326G T16362C T16519C                                                                                                                                                                                       |
| NA12763 | A73G T146C A263G G709A A750G G930A A1438G G1888A A2706G T4216C<br>A4769G A4917G G5147A C7028T G8697A A8860G T10463C A11251G G11719A<br>A11812G G13368A A14233G C14766T G14905A A15326G C15452A A15607G<br>G15928A T16126C C16294T C16296T T16304C T16519C                          |
| NA12775 | A73G T152C A189G C194T T195C T204C G207A A263G 310insC G709A A750G<br>T1243C T1406C A1438G A2706G A3505G A4769G G5046A G5460A C7028T<br>G8251A A8860G G8994A C11674T G11719A A11947G T12414C C12705T<br>A13263G C14766T A15326G T15784C G15883A G15884C C16223T C16292T<br>T16519C |
| NA12776 | A73G C150T A263G G499A A750G A1438G A1811G A2294G A2706G G3010A<br>T4703C A4769G C6228T C6518T C7028T A8860G G9266A A10506G A11467G<br>G11719A A12308G G12372A C13934T A14139G C14766T C15190T A15326G<br>T15454C T16189C A16343G G16390A T16519C                                  |
| NA12777 | A93G T146C A263G A750G A1438G G3010A A4769G A8860G T11809C<br>A15326G C16278T T16519C                                                                                                                                                                                              |
| NA12778 | T152C A263G A750G A1438G A4769G A8860G A14220G A15326G T16093C<br>T16519C                                                                                                                                                                                                          |
| NA12812 | 42insC A263G A750G A1438G G3010A A4769G A8860G A15326G T16093C<br>G16129A A16183C T16189C T16519C                                                                                                                                                                                  |
| NA12813 | A73G A263G T310N A750G A1438G A2706G C2772T T3197C C7028T A8860N<br>G9477A C10793T A11467G G11719A A12308G G12372A T13617C A13827G<br>C14766T A14793G A15326G C16114A G16129A T16189C C16192T C16256T<br>C16270T C16294T G16526A                                                   |
| NA12814 | A73G A263G A750G A1438G A2706G T3197C G3316A T4553C A4769G C7028T<br>A8860G G9477A A9667G A11467G G11719A A12308G G12372A T13617C<br>C14766T A14793G A15218G G15227A A15326G G15883A C16192T C16256T<br>C16270T C16291T A16399G                                                    |
| NA12815 | A73G A263G A750G A1438G A4769G A8860G G11719A C12034T A15326G<br>G16129A A16316G T16519C                                                                                                                                                                                           |
| NA12827 | T152C T204C T239C A263G A750G A1438G G3915A A4727G A4769G A8860G<br>G9380A G10589A T13926C A15326G C16193T A16219G G16274A T16362C<br>A16482G                                                                                                                                      |
| NA12828 | A263G A750G A1438G A4769G T6776C A8860G A15326G T16519C                                                                                                                                                                                                                            |

|         |                                                                                                                                                                                                                                                                                                                                                                                                                                                                                                                                                                    |
|---------|--------------------------------------------------------------------------------------------------------------------------------------------------------------------------------------------------------------------------------------------------------------------------------------------------------------------------------------------------------------------------------------------------------------------------------------------------------------------------------------------------------------------------------------------------------------------|
| NA12829 | T152C A263G A750G A1438G C3992T A4024G A4769G T5004C G8269A A8860G G9123A A10044G C14365T A14582G A15326G                                                                                                                                                                                                                                                                                                                                                                                                                                                          |
| NA12830 | T152C A263G 310insC 514delC 515delA A750G A1438G A4769G T8756C A8860G A8986G T9530C T12453C C12633T T13020A A13676G A15326G                                                                                                                                                                                                                                                                                                                                                                                                                                        |
| NA12842 | A263G A750G A1438G T4002C A4769G G7337A A8860G C14443T A15326G T16172C T16519C                                                                                                                                                                                                                                                                                                                                                                                                                                                                                     |
| NA12843 | A73G A263G A750G A1438G C1703T A2706G T3197C A4769G C7028T G7269A A7960C A8860G G9477A C10619T A10709C T11465C A11467G G11719A A12308G G12372A T13617C C14766T A14793G A15326G A15559G C16256T C16270T G16526A                                                                                                                                                                                                                                                                                                                                                     |
| NA12872 | A263G A750G A1438G A2706G A4769G G6755A C7028T A8860G A15326G T16172C T16311C                                                                                                                                                                                                                                                                                                                                                                                                                                                                                      |
| NA12873 | T152C T195C A263G A750G T961G A1438G G1719A A4769G G5979A T5986N T8448C A8860G G13759A A15326G A16293G T16311C A16525G                                                                                                                                                                                                                                                                                                                                                                                                                                             |
| NA12874 | A73G G185A A188G G228A A263G C295T C462T T489C A750G A1438G A2706G 2790delA G3010A T4216C A4769G C7028T A8860G T10084C A11251G G11719A A12612G G13708A C14766T T14798C A15326G C15452A C16069T T16126C G16319A                                                                                                                                                                                                                                                                                                                                                     |
| NA12878 | T152C A263G A750G A1438G C2259T A4745G A4769G G7337A A8860G T13326C C13680T G14831A C14872T A15326G                                                                                                                                                                                                                                                                                                                                                                                                                                                                |
| NA12889 | T72G T146C T195C A263G A750G A1438G A4769G A7930T A8860G A10771G A15326G G16319A T16519C                                                                                                                                                                                                                                                                                                                                                                                                                                                                           |
| NA12890 | T152C A263G A750G A1438G G3010A A3144G A4769G A8860G A15326G G15497A T16189C T16519C                                                                                                                                                                                                                                                                                                                                                                                                                                                                               |
| NA12891 | T195C A263G 513insC 513insA A606G A750G A1438G G3010A A4769G A4781G G5460A A8512G A8860G T8975C T13020C C14902T A15326G C16278T T16519C                                                                                                                                                                                                                                                                                                                                                                                                                            |
| NA18486 | A73G T152C C182T G185T T195C G247A A263G A357G G709A T710C A750G G769A T825A G1018A T1738C T2352C A2706G G2758A A2768G T2885C T3308C C3594T G3666A G3693A A4104G A4769G A5036G G5046A T5393C T5655C C6548T T6827C A6989G T7022C C7028T A7055G A7146G C7256T T7389C G7521A C7867T A8248G C8468T C8655T A8701G A8860G T9540C A10398G G10688A T10810C T10873C G11719A T12519C C12705T A13105G C13506T C13650T T13789C C13880A T14178C A14203G G14560A C14766T A14769G T15115C A15326G T16126C C16187T T16189C C16223T C16264T C16270T C16278T C16294T T16311C T16519C |
| NA18487 | A73G G143A T146C T152C T195C A263G C534T A750G G769A G1018A A1438G T2416C A2706G C2789T C3594T A4104G A4769G C6563T C7028T T7175C C7256T C7274T T7389C G7521A A7771G G8206A A8701G A8860G A9221G T9540C T10115C A10398G T10873C G11719A G11914A T11944C A12693G C12705T G13590A C13650T A13803G A14566G C14766T G14905A G15301A A15326G C15760T T15784C T16189C C16223T C16278T C16294T A16309G T16357C G16390A T16519C                                                                                                                                            |
| NA18488 | A73G C150T T195C A263G A750G A1438G T2352C A2706G A4769G C7028T                                                                                                                                                                                                                                                                                                                                                                                                                                                                                                    |

|         |                                                                                                                                                                                                                                                                                                                                                                                                                                                                                                                                                                                                 |
|---------|-------------------------------------------------------------------------------------------------------------------------------------------------------------------------------------------------------------------------------------------------------------------------------------------------------------------------------------------------------------------------------------------------------------------------------------------------------------------------------------------------------------------------------------------------------------------------------------------------|
|         | A8701G A8730G A8860N G9196A T9540C A10398G A10819G T10873C G11719A C12705T T14212C C14766T G14905A G15301A A15326G T16172C A16183C T16189C C16223T C16320T T16519C                                                                                                                                                                                                                                                                                                                                                                                                                              |
| NA18489 | A73G T146C T152C T195C A263G A750G G769A G1018A A1438G T2416C A2706G C2789T C3594T G3918A A4104G A4769G A5285G C7028T T7175C C7256T C7274T G7521A A7771G G8206A 8280insC A8701G A8860G A9221G T9540C T10115C A10398G T10873C G11719A G11914A T11944C A12693G C12705T G12771A G13590A C13650T A13803G A14566G C14766T A15244G G15301A A15326G T15629C T15784C C16223T C16278T C16294T G16390A T16519C                                                                                                                                                                                            |
| NA18498 | A73G T146C T152C C182T G185T T195C G247A A263G A357G G709A T710C A750G G769A T825A G1018A G1719A T1738C T2352C A2706G G2758A A2768G T2885C T3308C C3594T G3666A G3693A A4104G T4216C A4769G A5036G G5046A T5393C T5655C C6548T T6827C A6989G C7028T A7055G A7146G C7256T T7389C G7521A C7867T A8248G C8468T C8655T A8701G A8860G T9540C A10398G G10688A T10810C T10873C A11015G G11719A T12519C C12705T A13105G C13506T C13650T T13789C C13880A G13980A T14178C A14203G G14560A C14766T A14769G T15115C A15326G T16126C C16187T T16189C C16223T C16264T C16270T C16278T A16293G T16311C T16519C |
| NA18499 | A73G C150T G185A T195C C198T A263G G499A T593C A750G A1438G T2352C A2706G A4769G T4823C T6413C C7028T A8701G A8860G T9540C A10398G A10819G T10873C G11719A C12705T A13105G T14212C C14766T G14869A G14905A G15301A A15326G C16223T C16320T A16399G T16519C                                                                                                                                                                                                                                                                                                                                      |
| NA18501 | A73G T152C G185T A189G T195C G247A A263G A357G G709A T710C A750G G769A T825A G1018A T1738C C2000T T2352C A2706G G2758A A2768G T2885C T3308C C3594T G3666A G3693A A4104G A4769G A5036G G5046A T5393C T5655C C6548T T6827C A6989G C7028T A7055G A7146G C7256T T7389C G7521A C7867T A8248G C8468T C8655T A8701G A8860G T9540C A10398G G10688A T10810C T10873C G11719A T12519C T12609C T12696C C12705T A13105G C13506T C13650T T13789C C13880A T14178C A14203G G14560A C14766T A14769G T15115C A15326G T16126C C16187T T16189C C16223T C16264T C16270T C16278T A16293G T16311C T16519C              |
| NA18502 | A73G C150T T195C A263G T282C G709A A750G A1438G T2352C T2483C A2706G G3277A T4386C A4769G T6167C C7028T A8701G A8860G A9377G T9540C A10398G A10819G T10873C G11719A G12406A C12705T T14180C T14212C C14766T G14905A G15301A A15326G T15344C G15355A T16172C T16189C C16223T C16320T T16519C                                                                                                                                                                                                                                                                                                     |
| NA18504 | A73G C150T T195C A263G 514delC 515delA A750G G988A A1438G T2352C A2706G A4769G C7028T G7337A G7598A A8701G A8860G T9540C A10398G A10819G T10873C G11719A C12705T A13661G T14212C C14766T G14905A G15301A A15326G T16172C A16183C T16189C C16223T C16320T T16519C                                                                                                                                                                                                                                                                                                                                |
| NA18505 | A73G T146C T152C T195C A263G A750G G769A G1018A A1438G T2416C A2706G C2789T C3594T A4104G A4769G A5581G C7028T T7175C C7256T C7274T G7521A A7771G G8155A G8206A A8701G A8860G A9221G T9540C                                                                                                                                                                                                                                                                                                                                                                                                     |

|         |                                                                                                                                                                                                                                                                                                                                                                                                                                                                                                                                                                                                                                                                   |
|---------|-------------------------------------------------------------------------------------------------------------------------------------------------------------------------------------------------------------------------------------------------------------------------------------------------------------------------------------------------------------------------------------------------------------------------------------------------------------------------------------------------------------------------------------------------------------------------------------------------------------------------------------------------------------------|
|         | T10115C A10398G T10873C C11692T G11719A G11914A T11944C A12693G C12705T G13590A C13650T A13803G C14766T G15301A A15326G T15784C T16093C T16189C C16192N C16223T C16278T C16294T A16309G G16390A                                                                                                                                                                                                                                                                                                                                                                                                                                                                   |
| NA18507 | A73G T152C C182T G185T A189G T195C G247A A263G A357G G709A T710C A750G G769A T825A G1018A T1738C T2352C A2706G G2758A A2768G T2885C T3308C C3594T G3666A G3693A A4104G A4769G A5036G G5046A T5393C T5655C C6548T T6827C A6989G C7028T A7055G A7146G C7256T T7389C G7521A C7867T A8248G C8468T C8655T A8701G A8860G T9540C A10398G G10688A T10810C T10873C A11488G G11719A T12519C C12705T A13105G C13506T C13650T T13789C C13880A G13980A T14178C A14203G G14560A C14766T A14769G T15115C A15326G T16126C C16187T T16189C C16223T C16264T C16270T C16278T A16293G T16311C T16519C                                                                                 |
| NA18508 | A73G A263G 514delC 515delA A750G A1438G T2010C A2706G A3441G C3450T A4769G C5211T A5581G G5773A T6221C C7028T C8478T A8701G A8860G C9449T G9477A T9540C A10086G G10320A G10373A A10398G T10873C A11002G T11465C G11719A C12705T A13105G G13711A C13914A C14766T T15299C G15301A A15311G A15326G A15824G C15828N 15942delT C16148T C16223T C16278T C16348T T16362C T16519C                                                                                                                                                                                                                                                                                         |
| NA18510 | A93G T152C A189G A200G T236C G247A A263G G316A A750G G769A T825A G1018A C1048T A1438G A2245G A2706G G2758A T2885C C3516A C3594T T3847C T3866C A4104G C4312T T4586C A4769G T5096C G5231A T5442C G5460A C5603T T6185C C7028T A7146G C7256T G7521A C8428T C8468T A8566G C8655T A8701G A8860G C9042T A9181G C9195A A9347G T9540C G9755A G9801A C9818T G10143A A10398G G10589A C10664T G10688A T10810C T10873C T10915C G11176A A11641G G11719A G11914A G12007A C12705T A12720G A13105G A13276G C13506T C13650T T14308C T14386C C14766T C15136T A15326G G15431A G16129A C16148T C16168T T16172C C16187T C16188G T16189C C16193T C16223T A16230G T16311C C16320T T16519C |
| NA18511 | A73G T146C T152C T195C A263G A750G G769A G1018A A1438G T2416C A2706G C2789T C3594T A4104G A4769G A5581G C7028T T7175C C7256T C7274T G7521A A7771G G8206A A8701G A8860G A9221G T9540C T10115C A10398G T10873C G11719A G11914A T11944C A12693G C12705T G13590A C13650T A13803G A14566G C14766T G15301A A15326G T15784C T16189C C16192T C16278T C16294T A16309G G16390A T16519C                                                                                                                                                                                                                                                                                      |
| NA18516 | A73G C150T T152C C182T T195C C198T T204C A263G C418T A750G G769A G1018A A1438G G1442A C1706T C2332T A2358G T2416C A2706G C3594T A4104G A4158G T4370C A4767G A4769G C5027T C5331A T5814C G6026A C6713T C7028T C7256T G7521A T7624A C8080T G8206A G8387A A8701G G8856A A8860G A9221G T9540C T10115C A10398G T10828C T10873C G11719A T11944C G12236A C12705T A12948G G13590A C13650T C13924T A14059G C14766T G15110A G15217A G15301A A15326G C16114A G16129A G16213A C16223T C16278T A16309G C16355T T16362C G16390A                                                                                                                                                 |
| NA18517 | A73G A93G T146C C150T T152C C182T A183G T195C C198T A263G C325T                                                                                                                                                                                                                                                                                                                                                                                                                                                                                                                                                                                                   |

|         |                                                                                                                                                                                                                                                                                                                                                                                                                                                                                                                                         |
|---------|-----------------------------------------------------------------------------------------------------------------------------------------------------------------------------------------------------------------------------------------------------------------------------------------------------------------------------------------------------------------------------------------------------------------------------------------------------------------------------------------------------------------------------------------|
|         | 514delC 515delA T680C G709A A750G G769A G1018A T1040C A1438G G1442A G1888A C2332T T2416C A2706G T3200A C3594T A4104G A4769G T6965C C7028T C7256T G7521A T7624A G8206A A8701G T8772C A8860G A9221G T9540C T10115C A10398G T10873C G11719A T11944C G12236A C12705T G13590A C13650T G13928C G13958C C14766T G15110A G15217A G15227A G15301A T15313C A15326G C15574T C15849T C16223T C16264T C16278T G16390A                                                                                                                                |
| NA18519 | A73G G143A T146C T152C T195C A263G A750G G769A G1018A A1438G T2416C A2706G C2789T C3594T A4104G 4315delA A4769G G5147A C7028T T7175C C7256T C7274T G7521A A7771G G8206A C8562T A8701G A8860G A9221G T9540C G9966A T10115C A10398G T10873C G11719A G11914A T11944C A12693G C12705T G13590A C13650T A13803G A14566G C14766T G15301A A15326G T15784C A15924G T16189C C16223T C16278T C16294T A16309G G16390A                                                                                                                               |
| NA18520 | A73G C150T A189G A200G A263G A750G A1438G T1822C A2706G T3396C A3505G A3927G T4218C A4769G C5601T C7028T A7322G C7819A A8527G A8701G A8860G C8932T T9540C T9950C A10398G T10873C G11440A G11719A C12705T C14766T A14769G G15301A A15326G T15514C G15930A 15942delT T16126C T16209C C16223T C16292T T16311C T16519C                                                                                                                                                                                                                      |
| NA18522 | A73G C150T T152C C182T T195C C198T T204C A263G C418T A750G G769A G1018A T1406C A1438G G1442A A1692G C1706T C2332T A2358G T2416C A2706G C3594T A4104G A4158G T4370C A4767G A4769G C5027T C5331A T5814C G6026A C6713T C7028T C7256T G7521A T7624A C8080T G8206A G8387A A8701G G8856A A8860G A9221G T9540C T10115C A10398G T10828C T10873C G11719A T11944C G12236A C12705T A12948G G13590A C13650T C13924T A14059G C14766T G15110A G15217A G15301A A15326G C16114A G16129A T16189C G16213A C16223T G16274A C16278T C16355T T16362C G16390A |
| NA18523 | A73G T146C T152C T195C G207A A263G A750G G769A G930A G1018A A1438G T2416C A2706G C2789T C3594T A4104G A4769G A5581G C7028T T7175C C7256T C7274T G7521A A7771G G8206A A8701G A8860G A9221G T9540C T10115C A10398G T10873C G11719A G11914A T11944C A12693G C12705T G13590A C13650T A13803G A14566G C14766T G15301A A15326G T15784C T16093C T16189C C16223T C16278T C16294T G16390A T16519C                                                                                                                                                |
| NA18853 | A73G C150T T195C A263G A750G A1438G T2352C A2706G T4418C A4769G C7028T A8701G A8860G T9540C A10398G C10655T A10819G T10873C G11719A C12705T T14212C C14766T G14905A G15301A A15326G T16172C A16183C T16189C C16223T C16320T T16359C T16519C                                                                                                                                                                                                                                                                                             |
| NA18856 | A73G G143A T146C T152C T195C C198T G207A A263G A750G G769A G1018A T1189C A1438G T2416C A2706G C2789T C3594T T3866C A4104G A4769G G5417A C7028T T7175C C7256T C7274T G7521A A7771G G8206A A8701G A8860G A9221G T9540C T10115C G10143A A10398G T10873C G11719A G11914A T11944C A12693G C12705T G13590A C13650T A13803G A14566G C14766T G15301A A15326G T15784C T16189C C16192T C16223T C16278T                                                                                                                                            |

|         |                                                                                                                                                                                                                                                                                                                                                                                                                                                                                                                                                                                                                                            |
|---------|--------------------------------------------------------------------------------------------------------------------------------------------------------------------------------------------------------------------------------------------------------------------------------------------------------------------------------------------------------------------------------------------------------------------------------------------------------------------------------------------------------------------------------------------------------------------------------------------------------------------------------------------|
|         | C16294T A16309G G16390A                                                                                                                                                                                                                                                                                                                                                                                                                                                                                                                                                                                                                    |
| NA18858 | A73G G185A A189G A263G 514delC 515delA A750G A1438G A2706G C3450T A4769G G5773A T6221C A6527G C7028T C8349T A8701G A8860G A9007G C9449T T9540C A10086G A10398G T10873C G11719A C12705T A13105G C13914A C13934T A13935G T14182C A14320G C14766T G15301A A15311G A15326G A15824G 15942delT G16048A T16124C C16223T C16278T T16362C                                                                                                                                                                                                                                                                                                           |
| NA18861 | C64T A93G G185A A189G A200G T236C G247A A263G 514delC 515delA A750G G769A T825A G1018A C1048T A1438G A2245C A2706G G2758A T2885C C3516A C3594T T3866C A4104G C4312T T4586C A4769G T5096C G5231A T5442C G5460A C5603T C5681T T6185C C7028T A7146G C7256T G7521A G7805A C8428T C8468T A8566G C8655T A8701G A8860G C9042T A9347G T9540C G9755A C9818T A10398G G10589A C10664T G10688A T10810C T10873C T10915C G11176A A11641G G11719A G11914A G12007A C12705T A12720G A13105G A13276G C13506T C13650T T14308C C14766T C15136T A15326G G15431A G16129A C16148T C16168T T16172C C16187T C16188G T16189C C16223T A16230G T16311C C16320T T16362C |
| NA18864 | A73G T152C A263G A373G 514delC 515delA A750G T921C A1438G A2706G A3209N A4769G G5147A C5477T T5492C G6261A C7028T A7424G T8473C T8618C C8658T A8701G A8860G G9300A T9540C G9554A A10398G T10873C G11719A C12705T A13105G T13886C A14007G C14284T C14766T C15223T G15301A A15326G T16124C A16166G C16185T C16223T A16272G T16519C                                                                                                                                                                                                                                                                                                           |
| NA18865 | A73G A263G 514delC 515delA A750G A1438G A2706G C3450T A4769G T5063C G5417A G5773A T6221C C7028T A8701G A8860G C9449T T9540C A10086G G10373A A10398G T10873C A11002G G11004A G11719A C12705T A13105G C13914A C14766T G15301A A15311G A15326G A15824G 15942delT T16093C T16124C C16223T C16278T T16362C T16519C                                                                                                                                                                                                                                                                                                                              |
| NA18867 | A73G T146C T152C T195C A263G A750G T921C A1438G G1503A A2706G G4048A A4769G G5147A T5162C T6680C C7028T A7424G C7648T T8618C A8701G A8860G G9452A T9540C A10398G C10837T T10873C G11719A G11887A T12311C G12406A C12705T A13105G A13884G T13886C C14284T C14766T G15106A G15301A A15326G T16124C C16223T G16319A                                                                                                                                                                                                                                                                                                                           |
| NA18868 | A73G G143A T146C T152C T195C C198T A263G A750G G769A G930A G1018A A1438G T2242C T2416C A2706G C2789T G3010A T3308C T3338C C3594T A4104G A4769G C6311T A6663G C7028T T7175C C7256T C7274T G7521A A7771G G8206A G8584A T8604C A8701G A8860G A9221G T9540C T10115C A10398G T10873C G11719A G11914A T11944C A12693G C12705T G13590A C13650T A13803G G14258A A14566G C14766T G15301A A15326G T15784C T16086C A16183C T16189C C16223T C16278T C16294T A16309G G16390A                                                                                                                                                                            |
| NA18870 | A73G T146C C150T T152C C182T A183G T195C C198T T204C G207A A263G A750G G769A G1018A A1438G G1442A C1706T C2332T A2358G T2416C A2706G C3594T A4104G A4158G C4185T T4370C A4767G A4769G C5027T C5331A G5744A T5814C C6713T C7028T C7256T G7521A T7624A C8080T G8206A G8387A A8701G A8860G A8925G A9221G T9540C C10013T T10115C A10398G T10873C G11719A T11944C G12236A C12705T A12948G G13590A                                                                                                                                                                                                                                               |

|         |                                                                                                                                                                                                                                                                                                                                                                                                                                                                                                                                                                                                                        |
|---------|------------------------------------------------------------------------------------------------------------------------------------------------------------------------------------------------------------------------------------------------------------------------------------------------------------------------------------------------------------------------------------------------------------------------------------------------------------------------------------------------------------------------------------------------------------------------------------------------------------------------|
|         | C13650T A14059G G14544A C14766T G15110A G15217A A15236G G15301A C16114A G16129A A16212G G16213A C16223T C16278T C16295T G16390A                                                                                                                                                                                                                                                                                                                                                                                                                                                                                        |
| NA18871 | A73G A263G C264T A750G A851G A1438G A2706G T3202C C3450T A4769G G5773A T6221C C7028T A8701G A8860G C9449T T9540C A10086G G10373A A10398G T10873C A11002G G11719A A11800G C12705T A13105G C13914A C14766T G15301A A15311G A15326G A15824G 15942delT T16093C T16124C A16183C T16189C C16223T C16278T T16362C                                                                                                                                                                                                                                                                                                             |
| NA18873 | A73G C150T T195C A263G 514delC 515delA A1438G C2000T T2352C A2706G G4655A A4769G G5262A T6524C C7028T A7076G A8701G A8860G T9540C G9554A A10398G T10667C A10816G A10819G T10873C G11719A A12248G C12705T A13101C G13135A C13197T A13651G T14212C C14766T G15301A A15326G G15812A C16223T A16265T C16291T T16519C                                                                                                                                                                                                                                                                                                       |
| NA18874 | A73G T146C T152C T195C A263G A750G G769A T789C G1018A A1438G T2416C A2706G C2789T C3594T G3834A G3918A A4104G A4769G A5285G T6152C C7028T T7175C C7256T C7274T G7521A A7771G G8206A A8701G A8860G A9221G T9540C T10115C A10398G T10873C G11719A G11914A T11944C A12693G C12705T G13590A C13650T A13803G A14566G C14766T A15244G G15301A A15326G C15391T T15629C T15784C T16086C C16223T C16278T C16294T A16309G T16368C G16390A T16519C                                                                                                                                                                                |
| NA18876 | A93G G185A A189G A200G T236C G247A A263G 514delC 515delA A750G G769A T825A G1018A C1048T A1438G A2245C A2706G G2758A T2885C C3516A C3594T T3866C A4104G C4312T T4586C A4769G T5096C G5231A T5442C G5460A C5603T T6185C C7028T A7146G C7256T G7521A T8388C C8428T C8468T A8566G C8655T A8701G A8860G C9042T A9347G T9540C G9755A C9818T A10398G G10589A C10664T G10688A T10810C T10873N T10915C G11176A A11641G G11719A G11914A G12007A C12705T A12720G A13105G A13276G C13506T C13650T T14308C C14766T C15136T A15326G G15431A G16129A C16148T C16168T T16172C C16187N C16188N T16189C C16223T A16230G T16311C C16320T |
| NA18877 | A93G G185A A189G A200G T236C G247A A263G 514delC 515delA A750G G769A T825A G1018A C1048T A1438G A2245C A2706G G2758A T2885C C3516A C3594T T3866C A4104G C4312T T4586C A4769G T5096C G5231A T5442C G5460A C5603T T6185C C7028T A7146G C7256T G7521A C8428T C8468T A8566G C8655T A8701G A8860G C9042T A9347G T9540C G9755A C9818T A10398G G10589A C10664T G10688A T10810C T10873C T10915C G11176A A11641G G11719A G11914A G12007A C12705T A12720G A13105G A13276G C13506T C13650T T14308C C14766T C15136T A15326G G15431A G16129A C16148T C16168T T16172C C16187N C16188N T16189C C16223T A16230G T16311C C16320T        |
| NA18881 | A73G A189G A200G A234G A263G A750G A1438G T1822C A2706G T3396C T4218C A4769G C5601T A5843G C7028T C7819A C8410T A8527G A8701G A8860G C8932T A9461G T9540C T9950C C10070T A10398G T10873C G11440A G11719A C12705T C14766T A14769G G15301A A15326G T15514C 15942delT G16129A T16209C C16223T C16292T C16295T T16311C T16519C                                                                                                                                                                                                                                                                                             |

|         |                                                                                                                                                                                                                                                                                                                                                                                                                                                                                                                                                                                                                                                                             |
|---------|-----------------------------------------------------------------------------------------------------------------------------------------------------------------------------------------------------------------------------------------------------------------------------------------------------------------------------------------------------------------------------------------------------------------------------------------------------------------------------------------------------------------------------------------------------------------------------------------------------------------------------------------------------------------------------|
| NA18907 | A73G T152C A263G 514delC 515delA A750G A1438G A2706G C3450T A4769G T5063C G5417A G5460A G5773A T6221C C7028T A8701G A8860G C9449T T9540C A10086G G10373A A10398G T10873C A11002G G11719A C12705T A13105G C13914A C14766T C15145T G15301A A15311G A15326G A15824G 15942delT T16124C C16223T C16278T T16362C T16519C                                                                                                                                                                                                                                                                                                                                                          |
| NA18908 | A73G G143A T146C T152C T195C A263G A750G G769A G1018A A1438G T2416C A2706G C2789T G3010A C3594T A4104G A4769G A6663G C7028T T7175C C7256T C7274T G7521A A7771G G8206A A8701G A8860G A9221G T9540C T10115C A10398G T10873C G11719A G11914A T11944C A12693G C12705T T13260C G13590A C13650T A13803G A14566G C14766T G15301A A15326G T15784C G16129A C16223T C16278T C16294T A16309G G16390A                                                                                                                                                                                                                                                                                   |
| NA18909 | A73G C150T A263G 514delC 515delA A1438G T2352C A2706G G3915A A4769G G5262A A5584G A5711G G5979A G6366A C7028T A8701G A8860G T9540C A10398G A10819G T10873C C11257T G11719A C12705T A13638G C13749T T14212C C14766T G15301A A15326G A16051G T16209C C16223T C16264T T16519C                                                                                                                                                                                                                                                                                                                                                                                                  |
| NA18910 | A73G G143A T146C T152C T195C A215N A249N A263G G513A A750G G769A G1018A A1438G T2416C A2706G C2789T G3010A C3594T A4104G A4769G A6663G C7028T T7175C C7256T C7274T G7521A A7771G G8060N G8206A A8701G A8860G T9128C A9221G T9540C T10115C A10398G T10873C C10903T G11719A G11914A T11944C A12693G C12705T G13590A C13650T A13803G T13879C A14566G C14766T G15301A A15326G T15784C A15924G C16193T A16203G G16213A C16223T C16239T C16278T C16294T A16309G G16390A                                                                                                                                                                                                           |
| NA18912 | A73G G143A T146C T152C T195C A263G A750G G769A G1018A A1438G T2416C A2706G C2789T G3010A C3594T A4104G A4562G A4769G G5252A A6663G C7028T T7175C C7256T C7274T G7521A A7771G G8206A A8701G A8860G A9221G T9540C T10115C A10398G T10873C G11719A G11914A T11944C A12172G T12354C A12693G C12705T G13590A C13650T A13803G T13818C A14566G C14766T G15301A A15326G T15784C C16223T C16278T C16294T A16309G G16390A                                                                                                                                                                                                                                                             |
| NA18915 | A73G C151T T152C C182T C186A A189C G247A A263G G316A 514delC 515delA T629C A750G G769A T825A G1018A A1438G A1686G T2083C C2283T 2395delA A2706G G2758A T2885C C3210T A3434G C3594T G3666A A4104G T4755C A4769G G5417A A5951G T6071C T6221A G6917A C7028T A7146G C7256T T7389C G7521A G8027A G8251A C8417T C8468T C8655T A8701G A8860G A9072G T9540C A10398G G10586A G10688A T10810C T10873N C11302T G11719A A12400G C12542T C12705T A12810G A13105G A13485G C13506T C13650T T13789C C13981T T14000A T14178C G14560A C14766T C14794T C14911T A15226G A15326G T15905C C15978T T16017C G16129A A16163G C16187N T16189N C16223T C16278T A16293G C16294T T16311C T16519C C16527T |
| NA18916 | A73G T199C A263G 514delC 515delA A750G A1438G A2706G C3420T C3450T A4769G G5773A T6221C C7028T G7598A A8701G A8860G G9053A A9067G T9098C C9449T T9540C A10086G A10398G T10640C T10873C T11260C                                                                                                                                                                                                                                                                                                                                                                                                                                                                              |



|         |                                                                                                                                                                                                                                                                                                                                                                                                                                                                                                                                                                                                  |
|---------|--------------------------------------------------------------------------------------------------------------------------------------------------------------------------------------------------------------------------------------------------------------------------------------------------------------------------------------------------------------------------------------------------------------------------------------------------------------------------------------------------------------------------------------------------------------------------------------------------|
|         | G11719A C12705T A13105G C13914A C14766T G15301A A15311G A15326G C15550T T15804C A15824G 15942delT T16124C C16223T C16278T T16362C C16527T                                                                                                                                                                                                                                                                                                                                                                                                                                                        |
| NA18917 | A73G T152C C182T G185T A189G T195C G247A A263G A357G 514delC 515delA G709A T710C A750G G769A T825A G1018A T1193C T1738C T2352C A2706G G2758A A2768G T2885C T3308C C3594T G3666A G3693A A4104G A4769G A5036G G5046A T5393C T5655C C6548T T6827C A6989G C7028T A7055G A7146G C7256T T7389C G7521A C7867T A8248G C8468T C8655T A8701G A8860G T9540C A10398G G10688A T10810C T10873C G11719A T12519C C12705T A13105G C13506T C13650T T13789C C13880A T14178C A14203G G14560A C14766T A14769G C14915T T15115C A15326G T15693C T16126C C16187T T16189C C16223T C16264T C16270T C16278T T16311C T16519C |
| NA18921 | A73G T146C C150T T152C C182T A183G T195C C198T T204C A263G A750G G769A G1018A A1438G G1442A C1706T C2332T A2358G T2416C A2706G C3594T A4104G A4158G T4218C T4370C A4767G A4769G C5027T C5331A T5814C T6614C C6713T A6806G C7028T C7256T G7521A T7624A C8080T G8206A G8387A T8503C A8701G A8860G A9221G T9540C T10115C A10398G T10873N G11719A T11944C G12236A G12454A C12705T A12948G G13590A C13650T A14059G C14766T G15110A G15217A G15301A A15326G A15844G C16114A G16129A G16213A C16223T C16278T G16390A                                                                                    |
| NA18923 | A73G T152C C182T G185T A189G T195C G247A A263G A357G 514delC 515delA G709A T710C A750G G769A T825A G1018A T1738C T2352C A2706G G2758A A2768G T2885C T3308C C3594T G3666A G3693A A4104G A4769G A5036G G5046A T5393C T5655C C6548T T6827C A6989G C7028T A7055G A7146G C7256T T7389C G7521A C7867T A8248G C8468T C8655T A8701G A8860G T9540C A10398G G10688A T10810C T10873C G11719A T12519C C12705T A13105G C13506T C13650T T13789C C13880A G13980A T14178C A14203G G14560A C14766T A14769G T15115C A15326G T16126C C16187T T16189C C16223T C16264T C16270T C16278T A16293G T16311C T16519C        |
| NA18924 | A73G C182T G185T A189G T195C G247A A263G A357G 514delC 515delA G709A T710C A750G G769A T825A G1018A T1738C T2352C A2706G G2758A A2768G T2885C T3308C C3594T G3666A G3693A A4104G A4769G A5036G G5046A T5393C T5655C C6548T T6827C A6989G C7028T A7055G A7146G C7256T T7389C G7521A C7867T C7915T A8248G C8468T C8655T A8701G A8860G T9540C A10398G G10688A T10810C T10873C G11719A T12519C C12705T A13105G C13506T C13650T T13789C C13880A G13980A T14178C A14203G G14560A C14766T A14769G T15115C A15326G T16126C C16187T T16189C C16223T C16264T C16270T C16278T A16293G T16311C T16519C       |
| NA18933 | A73G T152C C182T G185T A189G T195C G247A A263G A357G G709A T710C A750G G769A T825A G1018A T1738C T2352C A2706G G2758A A2768G T2885C T3308C C3594T G3666A G3693A A4104G A4769G A5036G G5046A T5393C T5655C C6548T T6827C A6989G C7028T A7055G A7146G C7256T T7389C C7492T G7521A C7867T A8248G C8468T C8655T A8701G A8860G T9540C                                                                                                                                                                                                                                                                 |

|         |                                                                                                                                                                                                                                                                                                                                                                                                                                                                                                                                                                                                                                      |
|---------|--------------------------------------------------------------------------------------------------------------------------------------------------------------------------------------------------------------------------------------------------------------------------------------------------------------------------------------------------------------------------------------------------------------------------------------------------------------------------------------------------------------------------------------------------------------------------------------------------------------------------------------|
|         | A10398G G10688A T10810C T10873C G11719A T12519C C12705T A13105G C13506T C13650T T13789C C13880A T14178C A14203G G14560A C14766T A14769G G15077A C15103T T15115C A15326G T16126C C16187T T16189C C16223T C16270T C16278T A16293G T16311C T16519C                                                                                                                                                                                                                                                                                                                                                                                      |
| NA18934 | A73G C150T T195C C198T A263G 310insC G499A A750G A1438G T2352C A2706G G3531A A4769G T4823C T6413C C7028T A8701G A8860G T8911C T9540C A10398G A10819G T10873C G11719A C12705T A13105G T14212C C14766T G14869A G14905A G15301A A15326G C16223T C16320T A16399G T16519C                                                                                                                                                                                                                                                                                                                                                                 |
| NA19019 | A73G T152C C182T T195C T204C G247A A263G 455insT 455insT 455insC 514delC 515delA C537T G709A A750G G769A T825A A851G G930A G1018A A1438G T1822C A2706G T3423C G3438A C3594T A4104G C4496T A4769G C5111T G5147A A5656G G6182A T6297C C7028T C7256T A7424G G7521A A7972G G8155A A8188G C8582T C8655T A8701G C8754T A8860G G9305A G9329A T9540C A10398G G10688A T10810C T10873N T11025C G11719A C11881T G12236A C12432T C12705T A12950G A13105G C13506T C13650T A13722G T14212C C14239T T14581C C14668T C14766T T14819C G14905A T14971C G15217A A15326G G15884A G16129A C16148T A16166G A16183N T16189C C16223T C16278T T16311C T16362C |
| NA19020 | A73G 92insA C150T T195C A263G A750G A1438G T2352C A2706G T4216C A4769G T4823C C7028T A8701G A8860G T9540C A10398G A10819G T10873C G11719A C12705T A13105G T13879C T14212C C14766T G14869A G14905A G15301A A15326G C16223T C16261T C16295T C16320T T16519C                                                                                                                                                                                                                                                                                                                                                                            |
| NA19022 | A73G A263G 514delC 515delA A750G A1438G A2706G C3450T A4769G G5773A T6221C C7028T A8701G A8860G C9449T T9540C A10086G G10373A A10398G T10873N A11002G G11719A A11800G C12705T A13105G C13914A C14766T G15301A A15311G A15326G A15824G G15883A 15942delT T16093C T16124C C16223T C16278T T16362C T16519C                                                                                                                                                                                                                                                                                                                              |
| NA19023 | A73G T146C T152C T195C A263G A750G G769A G1018A A1438G T2416C A2706G C2789T C3594T A4104G A4769G A5581G C7028T T7175C C7256T C7274T G7521A A7771G G8206A A8701G A8860G A9221G T9540C A9632G T10115C A10398G T10873C G11719A G11914A T11944C A12693G C12705N G13590A C13650T A13803G A14566G C14766T G15301A A15326G T15784C T16189C C16223T C16278T C16294T A16309G G16390A T16519C                                                                                                                                                                                                                                                  |
| NA19026 | A73G A263G 514delC 515delA A750G A1438G A2706G C3450T A4769G G5773A T6221C C7028T A8701G A8860G C9449T T9540C A10086G G10373A A10398G T10873N A11002G G11719A A11800G C12705N A13105G C13914A C14766T G15301A A15311G A15326G A15824G G15883A 15942delT T16093C T16124C C16223T C16278T T16362C T16519C                                                                                                                                                                                                                                                                                                                              |
| NA19027 | C64T A93G T152C G185A A189G A200G T236C G247A A263G A368G 514delC 515delA A750G G769A T825A G1018A C1048T A1438G A2245G A2706G G2758A T2885C C3516A C3594T T3866C A4104G C4312T T4586C T4684N A4769G T5096C G5231A T5442C G5460A C5603T T5618C T6185C C7028T A7146G C7256T G7521A C8428T C8468T A8566G C8655T A8701G A8860G                                                                                                                                                                                                                                                                                                          |

|         |                                                                                                                                                                                                                                                                                                                                                                                                                                                                                                                                                                                                                                                                                                                         |
|---------|-------------------------------------------------------------------------------------------------------------------------------------------------------------------------------------------------------------------------------------------------------------------------------------------------------------------------------------------------------------------------------------------------------------------------------------------------------------------------------------------------------------------------------------------------------------------------------------------------------------------------------------------------------------------------------------------------------------------------|
|         | C9042T A9347G T9540C G9755A C9818T A10398G G10589A C10664T G10688A T10810C T10873N T10915C G11176A A11641G G11719A G11914A G12007A C12705T A12720G A13105G A13276G C13506T C13650T T14308C C14766T C15136T A15326G G15431A G16129A C16148T C16168T T16172C C16187T C16188N T16189C C16223T A16230G T16311C C16320T                                                                                                                                                                                                                                                                                                                                                                                                      |
| NA19028 | A73G T146C T152C C182T T195C A215G A263G C511T C537T A750G G769A G1018A A1438G A1900G T2416C T2626C A2706G C3594T C3654T A4104G A4769G T4823C C5263T G5316A A6040C G6366A T6497C C7028T T7175C C7256T G7521A G8206A A8701G A8860G A9221G T9540C T10115C A10398G T10873C T11009C G11719A T11944C C12705T T12879C A12967G G13590A C13650T G13810A C14766T A14890G G15301A A15326G C16278T C16295T A16309G T16519C                                                                                                                                                                                                                                                                                                         |
| NA19030 | A73G C150T T152C A263G 286delA 514delC 515delA A750G T921C A1438G G1503A A2706G A3579G G4048A A4203G A4769G G5147A G5471A T6680C C7028T A7424G C7648T T8618C A8701G A8860G T9540C A10398G T10640C T10873C T10915C G11719A G11887A C12705T A13105G T13886C C14284T C14766T G15301A A15326G C16223T G16319A                                                                                                                                                                                                                                                                                                                                                                                                               |
| NA19031 | A93G A95C T146C T152C T195C T236C G247A A263G 514delC 515delA A723G A750G G769A T825A G1018A C1048T A1438G G1719A A2245G A2706G G2758A T2885C C3516A C3594T A4104G C4312T T4586C A4769G T5442C T5580C C5603T T6185C T6248C T6719C C7028T A7146G A7241G C7256T T7302C G7337A A7424G G7521A A8158G C8428T C8468T A8566G C8655T A8701G A8860G C9042T A9347G T9540C G9755A C9818T A10398G G10589A C10664T G10688A T10810C T10873C T10915C C11638T A11641G G11719A A11884G G11914A G12007A C12705T A12720G A13105G A13276G C13506T C13650T A14440G C14766T G15106A C15136T A15244G A15326G G15431A T15622C C15913T A16051G T16063C C16148T A16164G T16172C A16182C 16183delA T16189C C16223T A16230G C16278T T16311C A16399G |
| NA19035 | A73G C150T A189G T195C A200G A263G A750G A1438G T2352C A2706G A4769G C5255T T6221C C6587T C7028T G7337A A8701G A8860G T9540C A10819G T10873C G11719A C12705T A13995G A14152G T14212C C14766T G15301A A15326G T15670C T15942C C16185T C16223T C16327T A16399G T16519C                                                                                                                                                                                                                                                                                                                                                                                                                                                    |
| NA19036 | A73G A263G A750G A1438G A2706G C3450T A4769G G5773A T6221C C7028T A8701G A8860G C9449T T9540C A10086G G10373A A10398G T10873C A11002G G11719A A11800G C12705T A13105G C13914A T14374C C14766T G15301A A15311G A15326G A15824G G15883A 15942delT T16093C T16124C C16223T C16278T T16362C T16519C                                                                                                                                                                                                                                                                                                                                                                                                                         |
| NA19037 | A73G A263G A750G A1438G G1719A A4388G A4769G C5300T T5492N C7028T T7861C T8047C G8485A A8701G A8860G T9509C T9540C G9575A A10398G T10873C A11590G G11719A C12432T G12651A C12705T A12753G G13708A T13926C T14110C C14766T G15301A A15326G T16189C T16298C T16311C                                                                                                                                                                                                                                                                                                                                                                                                                                                       |
| NA19038 | A73G T146C T152C A263G A750G A1438G C1597T G1719A A2706G A4388G T4688C T4742C A4769G C5300T T5492C G6023A C7028T T7861C A8701G                                                                                                                                                                                                                                                                                                                                                                                                                                                                                                                                                                                          |

|         |                                                                                                                                                                                                                                                                                                                                                                                                                                                                                                                                                                                                                                                                                              |
|---------|----------------------------------------------------------------------------------------------------------------------------------------------------------------------------------------------------------------------------------------------------------------------------------------------------------------------------------------------------------------------------------------------------------------------------------------------------------------------------------------------------------------------------------------------------------------------------------------------------------------------------------------------------------------------------------------------|
|         | C8781A A8860G C8943T T9509C T9540C G9575A A10398G T10873C C11512T A11590G G11719A T12175C G12236A T12519C C12705T A14587G C14766T C14862T G15301A A15326G C15646T C16148T C16223T T16311C A16399G                                                                                                                                                                                                                                                                                                                                                                                                                                                                                            |
| NA19039 | A93G A95C G185A A189G T236C 247delG A263G A328G C511T 514delC 515delA A750G G769A T825A G1018A C1048T A1438G A2245G A2706G G2758A T2885C A3447G C3516A C3594T A4104G C4312T T4586C A4769G G4959A G5231A T5442C G5460A C5603T T6185C C7028T A7146G C7256T 7461insC G7521A C8428T C8468T A8566G C8655T A8701G A8860G C9042T G9055A A9347G T9540C G9755A C9818T A10398G G10589A C10664T G10688A T10810C T10873C T10915C G11176A T11410C A11641G G11719A G11914A G12007A G12618A C12705T A12720G A13105G A13276G C13506T C13650T T14308C T14581C C14766T C15136T A15326G G15431A A15848G T15852C T16008C G16129A C16148T T16172C C16187T C16188G C16223T A16230G C16301T T16311C C16320T T16519C |
| NA19041 | A73G C182T G185T T195C G247A A263G A357G A750G G769A T825A G1018A T1738C T2352C A2706G G2758A A2768G T2812C T2885C T3308C C3594T G3666A G3693A A4104G A4769G A5036G G5046A T5393C T5655C G6150A C6548T T6827C A6989G C7028T A7055G A7146G C7256T T7389C G7521A C7867T A8248G C8468T C8655T A8701G A8860G T9540C A10398G G10688A T10810C T10873C G11719A T12519C C12705T A13105G C13506T C13650T T13789C C13880A T14178C A14203G G14560A C14766T A14769G T15115C A15326G T15670N T16126C C16187N T16189N C16223T C16264T C16270T C16278T T16311C T16519C                                                                                                                                      |
| NA19042 | C64T A93G T152C G185A A189G A200G T236C G247A A263G A368G 514delC 515delA A750G G769A T825A G1018A C1048T A1438G T1964N A2245G A2706G G2758A T2885C C3516A C3594T T3866C A4104G C4312T T4586C A4769G T5096C G5231A T5442C G5460A C5603T T5618C T6185C C7028T A7146G C7256T G7521A C8428T C8468T A8566G C8655T A8701G A8860G C9042T A9347G T9540C G9755A C9818T A10398G G10589A C10664T G10688A T10810C T10873C T10915C G11176A A11641G G11719A G11914A G12007A C12705T A12720G A13105G A13276G C13506T C13650T T14308C C14766T C15136T A15326G G15431A G16129A C16148T C16168T T16172C C16187T C16188G T16189C C16223T A16230G C16301T T16311C C16320T                                       |
| NA19043 | A73G A200G G247A A263G G499A 514delC 515delA T710C A750G G769A T825A G1018A A1438G T1717C G1719A T2080C C2484N A2581G A2706G T3423C A3564G C3594T G3918A G4092A A4104G G4655A C4676T A4769G T4967C A5501G T5628C A6527G C7028T C7256T G7521A A7765G G7789A C8655T A8701G A8860G T9018C T9540C T9653C T10101C A10398G G10688A T10810C T10873N C11266T T11287C G11719A T11809C C12432T A12507G C12705T G12940A A13050G C13383T C13506T T13602C C13650T C14766T A15235G A15236G T15262C A15326G C15418T G16129A A16166G C16187T C16223T A16254G C16278T C16291T C16301T T16342C T16368C C16527T                                                                                                 |
| NA19044 | A73G A263G A750G A1438G A2706G C3450T A4769G G5746N A5747N A5748N G5773A T6221C C7028T A8701G A8860G C9449T T9540C A10086G G10373A                                                                                                                                                                                                                                                                                                                                                                                                                                                                                                                                                           |

|         |                                                                                                                                                                                                                                                                                                                                                                                                                                                |
|---------|------------------------------------------------------------------------------------------------------------------------------------------------------------------------------------------------------------------------------------------------------------------------------------------------------------------------------------------------------------------------------------------------------------------------------------------------|
|         | A10398G T10873C A11002G G11719A A11800G C12705T A13105G C13914A C14766T G15301A A15311G A15326G A15824G G15883A 15942delT T16093C T16124C C16223T C16278T T16362C T16519C                                                                                                                                                                                                                                                                      |
| NA19045 | A73G T146C T152C C182T A183G C186T C198T A263G G513A 514delC 515delA T742C A750G G769A G1018A A1438G G1719A T2416C T2626C A2706G C3321T C3594T C3654T C4032T A4104G A4769G C5263T C5602T A6040C T6497C C7028T T7175C C7256T G7521A G8206A A8701G A8860G T9540C T10115C A10398G T10463C T10873C G11719A T11944C G12630A C12705T T12879C G13590A C13650T C14766T A14890G G15301A A15326G C16223T T16224C C16278T A16309G G16390A A16399G T16519C |
| NA19046 | A73G T146C T152C A181N C186T A263G G513A 514delC 515delA T742C A750G G769A G1018A A1438G G1719A T2416C T2626C A2706G C3321T C3594T C3654T C4032T A4104G A4769G C5263T C5602T A6040C T6497C C7028T T7175C C7256T G7521A G8206A A8701G A8860G T9540C T10115C A10398G T10463C T10873C G11719A T11944C G12630A C12705T T12879C G13590A C13650T C14766T A14890G G15301A A15326G C16278T A16309G G16390A A16399G T16519C                             |
| NA19092 | A73G C150T T195C C198T A263G T310N A750G A1438G T2352C A2706G A4769G T4823C T6167C T6413C C7028T A8701G A8860G T9540C A10398G A10819G T10873C G11719A C12705T A13105G T14212C C14766T G14869A G14905A G15301A A15326G C16223T C16320T T16519C                                                                                                                                                                                                  |
| NA19093 | A73G G143A T146C T152C T195C T236C A263G A750G G769A G1018A A1438G G1719A T2416C A2706G C2789T G3010A C3594T A4104G A4769G A6663G C7028T T7175C C7256T C7274T G7521A A7771G G8206A A8701G A8860G A9221G T9540C T10115C A10398G T10873C G11719A G11914A T11944C A12693G C12705T T13260C G13590A C13650T A13803G A14566G C14766T G15110A G15301A A15326G T15784C G16129A C16223T C16278T C16294T A16309G G16390A                                 |
| NA19095 | A73G T146C T152C T195C A263G A750G G769A G1018A A1438G T2416C A2706G C2789T C3594T G3918A A4104G T4634C A4769G A5285G C7028T T7175C C7256T C7274T G7521A A7771G G8206A A8701G A8860G T9540C T10115C A10398G T10873C G11719A G11914A T11944C A12693G C12705T G13145A G13590A C13650T A13731N A13803G A14566G C14766T A15244G G15301A A15326G T15629C T15784C C16223T C16278T C16286T C16294T A16309G G16390A T16519C                            |
| NA19096 | A73G G143A T146C T152C T195C A263G A750G G769A G1018A A1438G T2416C A2706G C2789T G3010A C3594T A4104G A4769G A6663G C7028T T7175C C7256T C7274T G7521A A7771G G8206A A8701G A8860G A9221G T9540C G9738A T9854C G9932A T10115C A10398G T10873C G11719A G11914A T11944C A12693G C12705T G13590A C13650T A13803G A13827G G14384A A14566G C14766T A14965G G15301A A15326G T15784C T16086C C16223T C16278T C16294T T16311C C16355T G16390A T16519C |
| NA19098 | A73G T152C A263G 310insC T372C 514delC 515delA A750G A1438G A2706G G3019A C3450T A4769N G5773A T6221C C7028T A8347G A8701G C9449T                                                                                                                                                                                                                                                                                                              |

|         |                                                                                                                                                                                                                                                                                                                                                                                                                                                                                                                        |
|---------|------------------------------------------------------------------------------------------------------------------------------------------------------------------------------------------------------------------------------------------------------------------------------------------------------------------------------------------------------------------------------------------------------------------------------------------------------------------------------------------------------------------------|
|         | T9540C A10086G G10373A A10398G T10873C A11002G G11719A C12705T A13105G T13830N C13914A C14766T G15301A G15314A A15326G A15824G T15900C 15942delT T16124C C16223T C16278T T16519C                                                                                                                                                                                                                                                                                                                                       |
| NA19099 | A73G G143A T146C T152C A153G T195C A263G A750G G769A G1018A A1438G T2416C A2706G C2789T C3594T A4104G A4769G C6572T C7028T T7175C C7256T C7274T G7521A A7771G G8206A 8281delC 8282delC 8283delC 8284delC 8285delC 8286delT 8287delC 8288delT 8289delA C8553T A8701G A8860G A9221G T9540C T10115C A10398G T10873C A11167G G11719A G11914A T11944C A12693G C12705T T13326C G13590A C13650T A13803G A13884G A14566G C14766T G15301A A15326G T15784C T16189C C16223T C16278T C16294T A16309G G16390A                       |
| NA19102 | A73G T146C T152C T195C A263G A750G G769A G1018A A1438G T2416C A2706G C2789T C3594T G3918A A4104G A4769G A5285G T6152C C7028T T7175C C7256T C7274T G7521A A7771G G8206A A8701G A8860G A9221G T9540C T10115C A10398G T10828C T10873C G11719A G11914A T11944C A12693G C12705T G13590A C13650T A13803G A14566G C14766T A15244G G15301A A15326G A15358G C15391T T15629C T15784C C16223T C16278T C16294T A16309G T16368C G16390A T16519C                                                                                     |
| NA19107 | A73G T195C A263G 514delC 515delA A750G A1438G A2706G C3420T C3450T T4336C A4769G T5250C G5773A T6221C C7028T A8701G A8860G G9438A C9449T T9540C A10086G A10398G T10640C T10873C G11719A G12236A C12705T A13105G C13914A C14766T G15301A A15311G A15326G T15654A A15824G 15942delT T16124C G16145A 16183delA T16189C C16223T A16227G C16278T T16362C C16527T                                                                                                                                                            |
| NA19108 | A73G T146C C150T T152C C182T A183G A263G A479G G719A A750G G769A C954T G1018A G1211A A1438G T2416C A2706G A3537G C3594T A4104G A4562G A4769G A5069T T6014C C7028T C7256T G7521A G8206A T8383C A8701G A8860G G8994A A9221G A9377G T9540C C9971T T10115C A10398G T10873C G11149A G11719A T11935C T12189C C12705T C13023T G13194A G13590A C13650T G13708A T14299C C14766T G15301A A15326G T15697C G15734A T15889C C16111A G16145A C16184T A16212G C16223T C16239T C16278T C16292T C16355T G16390A A16399G C16400T T16519C |
| NA19113 | A73G 149delT C150T T152C T195C G228A A263G A750G A1438G T2352C A2706G A4769G C5742N C5743N G5744N G5745N G5746N A5747N A5748N A5749N C7028T A8701G A8860G T9540C A10398G A10819G T10873C G11719A C12705T T14212C C14766T G14905A G15301A A15326G T16172C 16183delA C16184A T16189C A16215N C16223T C16320T T16519C                                                                                                                                                                                                     |
| NA19114 | A73G C150T A189G A200G A263G A750G A1438G T2352C A2706G A4769G T6221C C6587T C7028T A8701G A8860G T9540C G10172A A10819G T10873C G11719A T12438C C12705T A14152G T14212C C14766T G15301A A15326G T15670C T15942C T16093C C16185T C16223T C16327T                                                                                                                                                                                                                                                                       |
| NA19116 | A73G T146C T152C T195C A263G A750G G769A G1018A A1438G T2416C A2706G C2789T C3495A C3594T A4104G T4216C A4769G G5231A C7028T T7175C C7256T C7274T G7521A A7771G G8206A G8541A A8701G G8790A                                                                                                                                                                                                                                                                                                                            |

|         |                                                                                                                                                                                                                                                                                                                                                                                                                                                                   |
|---------|-------------------------------------------------------------------------------------------------------------------------------------------------------------------------------------------------------------------------------------------------------------------------------------------------------------------------------------------------------------------------------------------------------------------------------------------------------------------|
|         | A8860G A9221G T9540C T10115C A10398G T10873C G11719A G11914A T11944C G12630A A12693G C12705T G13590A C13650T A13803G A13827G A14566G A14599G C14766T G15301A A15326G T15784C C16223T C16278T C16294T A16309G G16390A T16519C                                                                                                                                                                                                                                      |
| NA19117 | A73G T146C T152C T195C A263G A750G G769A G1018A A1438G T2416C A2706G C2789T C3594T G3918A A4104G A4769G A5285G C7028T T7175C C7256T C7274T G7521A A7771G G8206A A8701G A8860G A9221G T9540C T10115C A10398G T10454C T10873C G11719A G11914A T11944C A12693G C12705T G13590A C13650T A13803G A14566G C14766T C15211T A15244G G15301A A15326G A15421G T15629C T15784C C16223T C16278T C16286T C16294T A16309G G16390A T16519C                                       |
| NA19118 | A73G C150T T195C C198T A263G T460A A750G A1438G T2352C A2706G A4769G T4823C T6413C C7028T A8701G A8860G T9540C A10398G A10819G T10873C G11719A C12705T A13105G T14212C C14766T G14869A G14905A G15301A A15326G A16170G C16223T T16311C C16320T T16519C                                                                                                                                                                                                            |
| NA19119 | A73G A263G A750G A1438G A2706G A3441G C3450T T4586C A4769N C5211T A5581G G5773A T6221C C7028T A8701G C9449T G9477A T9540C A10086G G10373A A10398G T10873C A11002G G11719A A12634G C12705T A13105G C13914A C14766T T15299C G15301A A15311G A15326G A15824G 15942delT C16223T C16278T T16362C T16519C                                                                                                                                                               |
| NA19121 | A73G T152C A263G A750G T921C A1438G A2706G A4769G G5147A C7028T A7158G A7424G T8618C A8701G A8860G T9540C A10398G C10587T T10873C G11719A T12311C C12705T A13105G T13886C C14284T C14766T G15301A A15326G A15799G G15930A T16124C C16223T A16318G T16362C                                                                                                                                                                                                         |
| NA19122 | A73G T146C T152C C182T T195C C198T A263G C325T 514delC 515delA T680C G709A A750G G769A G1018A A1438G G1442A C2332T T2416C 2457delA A2706G T3200A C3594T A4104G A4769G G5147A T5201C G6260A C7028T C7256T G7521A T7624A G8206A A8701G A8860G A9221G T9540C T10115C A10398G T10873N G11719A T11944C G12236A C12705T G13590A C13650T G13708A G13928C G13958C C14766T G15110A G15217A G15301A A15326G C15849T T16172C C16223T C16278T T16311C A16318G C16320T G16390A |
| NA19124 | A73G A263G 514delC 515delA A750G A1438G A1710C A1999G A2706G C3450T A4769G G5460A G5773A T6221C G6249A C7028T A8701G A8860G A9374G C9449T T9540C C9605T A10086G G10373A A10398G T10873C A11002G G11719A C12705T A13105G C13914A A14755G C14766T G15301A A15311G A15326G A15824G 15942delT T16124C C16223T C16278T T16311C T16362C T16519C                                                                                                                         |
| NA19125 | A73G T146C T152C T195C A263G A750G G769A T1005C G1018A A1438G T2416C A2706G C2789T C3594T A4104G A4769G A5581G C7028T T7175C C7256T C7274T G7521A A7771G G8206A A8701G G8743A A8860G A9221G T9540C T10115C A10398G T10873C C11151T G11719A G11914A C11920T T11944C A12693G C12705T G13590A C13650T A13803G A14566G C14766T G15301A A15326G T15784C T16189C C16223T C16278T C16294T A16309G G16390A                                                                |

|         |                                                                                                                                                                                                                                                                                                                                                                                                                                                                                                                                                                                                                          |
|---------|--------------------------------------------------------------------------------------------------------------------------------------------------------------------------------------------------------------------------------------------------------------------------------------------------------------------------------------------------------------------------------------------------------------------------------------------------------------------------------------------------------------------------------------------------------------------------------------------------------------------------|
| NA19129 | A73G T146C T152C T195C A263G A750G G769A G1018A A1438G T2416C A2706G C2789T C3594T A4104G A4769G C7028T T7175C C7256T C7274T G7521A A7771G G8206A A8701G A8860G A9221G T9540C T10115C G10143A A10398G T10873C G11719A G11914A T11944C A12693G C12705T G13590A C13650T A13803G A14566G C14766T G15301A A15326G C15735T T15784C T16189C C16192N C16223T C16278T C16294T A16309G G16390A T16519C                                                                                                                                                                                                                            |
| NA19130 | A73G G143A T146C T152C T195C A263G G709A A750G G769A G1018A A1438G T2416C A2706G C2789T G3010A C3594T A4104G A4769G A6663G C7028T T7175C C7256T C7274T G7521A A7771G G8206A A8701G A8860G A9221G T9540C T9854C G9932A T10115C A10398G T10873C G11719A G11914A T11944C A12693G C12705T G13590A C13650T A13803G G14259A G14384A A14566G C14766T A14965G G15301A A15326G A15496G T15519C T15784C C16223T C16278T C16294T T16311C G16390A                                                                                                                                                                                    |
| NA19131 | A73G T152C C182T G185T T195C T204C G247A A263G A357G 514delC 515delA T710C A750G G769A T825A G1018A T1738C T2352C A2706G G2758A A2768G T2885C T3308C C3594T G3666A G3693A A4769N A5036G G5046A T5393C T5655C C6548T T6827C A6989G C7028T A7055G T7389C C7867T A8248G C8468T C8655T A8701G T9540C A10398G G10688A T10810A T10873C G11719A T12519C C12705T A13105G C13506T C13650T T13789C C13880A T14178C A14203G G14560A C14766T A14769G T15115C A15326G T15586C T16126C C16187T T16189C C16223T C16264T C16270T C16278T T16311C T16519C                                                                                 |
| NA19133 | A73G T152C C182T G185T A189G T195C G247A A263G A357G 514delC 515delA G709A T710C A750G G769A T825A G1018A T1738C T2352C A2706G G2758A A2768G T2885C T3308C C3594T G3666A G3693A A4104G A4361N A4367N A4769G A5036G G5046A T5393C T5655C C6548T T6827C A6989G C7028T A7055G A7146G C7256T T7389C G7521A C7867T C8468T C8655T A8701G A8860G T9540C A10398G G10688A T10810C T10873N G11719A T12519C C12705N A13105G C13506T C13650T T13789C C13880A G13980A T14034C T14178C A14203G G14560A C14766T A14769G A14926G T15115C A15326G T16126C C16187N T16189C C16223T C16264T A16265G C16270T C16278T A16293G T16311C T16519C |
| NA19135 | A73G T146C T152C C182T G185T A189G G247A A263G A357G 514delC 515delA C569T G709A T710C A750G G769A T825A G1018A T1738C T2352C A2706G G2758A A2768G T2885C T3308C C3594T G3666A G3693A A4104G A4769G C6548T T6827C A6989G C7028T A7055G A7146G C7256T T7389C G7521A G7598A C7867T A8248G C8468T C8655T A8701G A8860G T9540C A10398G G10688A T10810C T10873C G11719A A12171G T12519C C12705T C12891T A13105G C13506T C13650T T13789C A13893G T14178C G14323A G14560A C14766T A14769G T15115C A15326G C16111T T16126C C16187T T16189C C16223T C16239T C16270T C16278T A16293G T16311C T16519C                               |
| NA19137 | C64T A93G G185A A189G A200G T236C G247A A263G A750G G769A T825A G1018A C1048T A2245C A2706G G2758A T2885C C3516A C3594T T3866C A4104N C4312T T4586C A4769G T5096C G5231A T5442C G5460A C5603T                                                                                                                                                                                                                                                                                                                                                                                                                            |



|         |                                                                                                                                                                                                                                                                                                                                                                                                                                                                                                                                                                                     |
|---------|-------------------------------------------------------------------------------------------------------------------------------------------------------------------------------------------------------------------------------------------------------------------------------------------------------------------------------------------------------------------------------------------------------------------------------------------------------------------------------------------------------------------------------------------------------------------------------------|
|         | T6185C C7028T A7146G C7256T G7521A C8428T C8468T A8566G C8655T A8701G A8860G C9042T A9347G T9540C G9755A C9818T A10398G G10589A C10664T G10688A T10810C T10873C T10915C G11176A A11641G G11719A G11914A G12007A C12705T A12720G A13105G A13276G C13506T C13650T T14308C C14632T C14766T C15136T A15326G G15431A G16129A C16148T C16168T T16172C C16187T C16188G T16189C C16223T A16230G T16311C C16320T                                                                                                                                                                             |
| NA19138 | A73G C150T T152C A189G A263G A750G A1438G T2352C A2706G C4242T A4769G T5160C A6932G C7028T A8701G A8860G T9540C A10398G A10819G T10873C G11719A C12705T T14212C C14766T G14905A G15301A A15326G T15670C T15941C T16172C A16183C T16189C C16223T C16320T T16519C                                                                                                                                                                                                                                                                                                                     |
| NA19141 | A73G C150T A189G A200G G207A A263G A750G A1438G T2352C A2706G A4769G T6221C C6587T C7028T A8701G A8860G T9540C A10398G A10819G T10873C G11719A C12705T A13302G A14152G T14212C C14766T A14926G G15301A A15326G T15670C T15942C C16223T 16323delT                                                                                                                                                                                                                                                                                                                                    |
| NA19143 | A73G A263G 514delC 515delA A750G A1438G T1607C A2706G A3441G C3450T A4769G C5211T A5581G G5773A T6221C C7028T A8701G A8860G C9449T G9477A T9540C A10086G G10320A G10373A A10398G T10873C A11002G T11465C G11719A C12214A C12705T A13105G C13914A C14766T T15097C T15299C G15301A A15311G A15326G A15824G 15942delT C16223T C16278T C16291T T16362C T16519C                                                                                                                                                                                                                          |
| NA19144 | A73G T152C T199C A263G 514delC 515delA A750G T921C A1438G A2706G A4769N G5147N C7028T A7158G A7424G T8618C A8701G A8860N T9540C A10398G T10873C G11719A T12311C C12705T A13105G A13266G A13434G T13886C G13889A C14284T C14766T G15301A A15326G A15799G G15930A T16124C C16223T T16362C T16519C                                                                                                                                                                                                                                                                                     |
| NA19146 | A73G T146C 149delT C150T T152C C182T A263G A479G G719A A750G G769A C954T G1018A G1211A A1438G T2416C A2706G C2710T A3537G C3594T T3633C G3666A A4104G A4562G T4703C A4769G A5069T G5585A 5810delA T6014C C7028T C7256T G7521A A7673G G8206A T8383C A8701G A8860G G8994A A9221G A9377G T9540C C9971T T10115C A10398G T10873C G11149A G11719A T11935C T12189C G12651A C12705T G13194A G13590A C13650T G13708A T14299C G14364A C14766T G15301A A15326G T15697C G15734A T15889C T16093C C16111A G16145A C16184T C16223T C16239T C16278T C16291T C16355T T16362C G16390A C16400T T16519C |
| NA19147 | A73G T146C C150T T152C T195C A263G A750G A1438G T2352C A2706G A4769G C7028T C7370T A8701G A8860G T9540C A10398G A10819G T10873C G11719A C12705T T14212C C14766T G14905A G15301A A15326G A15703G T16172C A16183C T16189C C16223T C16320T C16327A T16519C                                                                                                                                                                                                                                                                                                                             |
| NA19149 | A73G G143A T146C T152C T195C A263G A750G G769A G1018A A1438G T2416C A2706G C2789T G3010A C3594T A4104G A4769G A6663G C7028T T7175C C7256T C7274T G7521A A7771G G8206A A8701G A8860G A9221G T9540C T10115C A10398G T10873C G11719A G11914A T11944C A12693G C12705T T13260C G13590A C13650T A13803G A14566G C14766T G15301A                                                                                                                                                                                                                                                           |

|         |                                                                                                                                                                                                                                                                                                                                                                                                                                                                                                                                                                                                                                                                                     |
|---------|-------------------------------------------------------------------------------------------------------------------------------------------------------------------------------------------------------------------------------------------------------------------------------------------------------------------------------------------------------------------------------------------------------------------------------------------------------------------------------------------------------------------------------------------------------------------------------------------------------------------------------------------------------------------------------------|
|         | A15326G T15784C G16129A C16223T C16278T C16294T A16309G G16390A                                                                                                                                                                                                                                                                                                                                                                                                                                                                                                                                                                                                                     |
| NA19150 | A73G C150T T195C G228A A263G A750G A1438G T2352C A2706G A4769G<br>G5585A C7028T A8701G A8860G G9196A T9540C A10398G A10819G T10873C<br>G11719A C12705T T14212C C14766T G14905A G15301A A15326G T16172C<br>16183delA C16184A T16189C C16223T C16320T T16519C                                                                                                                                                                                                                                                                                                                                                                                                                         |
| NA19152 | A73G T146C T152C T195C A215G A263G A750G G769A G1018A A1438G<br>T2416C A2706G C2789T C3594T A4104N C7028T T7175C C7274T G7521N<br>A7771G A8116G G8206A A8701G A9221G T9540C T10115C G10143A A10398G<br>T10873C G11719A G11914A T11944C A12693G C12705T G13590A C13650T<br>A13803G T14034C A14566G C14766T G15301A A15326G T15784C T16189C<br>C16192T C16223T C16278T C16294T T16352C G16390A T16519C                                                                                                                                                                                                                                                                                |
| NA19153 | A73G C151T T152C T199C A263G T310N 514delC 515delA A750G T921C<br>A1438G A2706G G3745A C7028T A7424G T8618C A8701G T9540C A10398G<br>T10873C G11719A C12705T A13105G T13191C G13711A T13886C T14215C<br>C14272T C14284T T14584C C14766T G15301A A15326G C16111T T16124C<br>C16223T A16497G T16519C                                                                                                                                                                                                                                                                                                                                                                                  |
| NA19156 | C64T A93G T152C G185A A189G A200G T236C G247A A263G A374G 514delC<br>515delA A750G G769A T825A G1018A C1048T A1438G A2245G A2706G<br>G2758A T2885C C3516A C3594T T3866C A4104G C4312T T4586C A4769G<br>T5096C G5231A T5442C G5460A C5603T T6185C C7028T A7146G C7256T<br>G7521A C8428T C8468T A8566G C8655T A8701G A8860G C9042T A9347G<br>T9540C G9755A C9818T A10398G G10589A C10664T G10688A T10810C<br>T10873C T10915C G11176A A11641G G11719A G11914A G12007A C12705T<br>A12720G A13105G A13276G C13506T C13650T T14308C T14431C C14766T<br>C15136T A15326G G15431A G16129A C16148T C16168T T16172C C16187N<br>C16188N T16189C C16223T A16230G C16278T T16311C C16320T T16519C |
| NA19157 | A73G T146C T152C T195C A263G A750G G769A G1018A A1438G A2220G<br>T2416C A2706G C2789T C3594T A4104G A4769G A5581G C7028T T7175C<br>C7256T C7274T G7521A A7771G G8206A A8701G A8860G A9221G T9540C<br>T10115C A10398G T10873C G11719A G11914A T11944C A12693G C12705T<br>G12940A G13590A C13650T A13803G A14566G C14766T G15301A A15326G<br>T15784C G16129A A16183N T16189C C16223T C16278T C16294T G16390A<br>T16519C                                                                                                                                                                                                                                                               |
| NA19159 | A73G C150T A189G A200G A263G 310insC A750G A1438G T1822C A2706G<br>T3396C A3505G T4216C T4218C A4767G C5601T C7028T C7819A A8527G<br>A8701G C8932T T9540C T9950C A10398G T10873C G11440A G11719A<br>C12705T T13602C C14766T A14769G G15301A A15326G T15514C 15942delT<br>T16209C C16218T C16223T T16311C T16519C                                                                                                                                                                                                                                                                                                                                                                    |
| NA19160 | A73G C150T T195C A263G A750G A1438G T1694C T2352C A2706G G3496A<br>G4560A A5582G C7028T G8009A A8701G T9540C A10398G A10819G T10873C<br>G11377A T11386C G11719A C12705T T14212C C14766T G14905N G15301A<br>A15326G T16172C A16183C T16189C C16223T T16304C T16311C C16320N<br>T16519C                                                                                                                                                                                                                                                                                                                                                                                               |
| NA19162 | A73G C150T T195C A263G A750G A1438G T2352C A2706G C3582A A3796G                                                                                                                                                                                                                                                                                                                                                                                                                                                                                                                                                                                                                     |

|         |                                                                                                                                                                                                                                                                                                                                                                                                                                                                                                                                                                                                                                                                                       |
|---------|---------------------------------------------------------------------------------------------------------------------------------------------------------------------------------------------------------------------------------------------------------------------------------------------------------------------------------------------------------------------------------------------------------------------------------------------------------------------------------------------------------------------------------------------------------------------------------------------------------------------------------------------------------------------------------------|
|         | A4769G T4823C A5951G C7028T A8701G A8860G T9540C T10335C A10398G C10556T A10819G T10873N G11719A C12705T A13105G T14212C C14766T G14869A G14905A G15301A A15326G C16223T C16320T T16519C                                                                                                                                                                                                                                                                                                                                                                                                                                                                                              |
| NA19163 | A73G C151T T152C C182T C186A A189C G247A A263G G316A A385G 514delC 515delA A750G G769A T825A G1018A A1438G 2395delA A2706G G2758A T2885C T3096C C3594T G3666A A4104G A4769G A5951G T6071C T6221A T6297N A6353G G6917A C7028T A7146G C7256T T7389C G7521A G7762A G7805A A7844G G8027A G8251A C8468T C8655T A8701G A8860G A9072G T9540C A10398G G10586A G10688A T10810C T10873N C11302T G11719A C12705N A12810G A13105G A13485G C13506T C13650T T13789C C13981T T14000A A14128G T14178C G14560A C14766T C14794T G14831A C14911T T15115C A15226G A15244G A15326G T15905C A15924G C15978T T16086C G16129A A16163G C16187N T16189N C16223T C16278T A16293G C16294T T16311C C16360T T16519C |
| NA19166 | A73G C150T A189G A200G A263G A750G G1018A A1438G T2352C 2457delA A2706G A4361N A4367N A4769G T6221C C6587T C7028T A8701G A8860G T9540C T10235C A10398G A10819G T10873N G11719A C12705T A13105G A14152G T14212C C14766T A14926G G15301A A15326G T15670C T15942C C16223T C16256T 16323delT C16327T                                                                                                                                                                                                                                                                                                                                                                                      |
| NA19168 | A73G C150T A189G A200G A263G A750G A1438G T2352C A2706G T4047C A4769G T6221N G6261A C6587T C7028T A8701G A8860G T9540C A10398G A10819G T10873N G11719A C12705T A14152G T14212C G14569A C14766T G15301A A15326G T15670C T15942C G16153A C16223T C16327T                                                                                                                                                                                                                                                                                                                                                                                                                                |
| NA19171 | A73G C150T T195C A263G 310insC A1438G C2000N T2352C A2706G G4655A A4769N G5262A T6524C C7028T A8701G A9524G T9540C G9554A A10398G T10667C A10816G A10819G T10873C G11719A A12248G A12358G C12705T A13101C C13197T A13651G T14212C C14766T G15301A A15326G G15812A T16093C C16223T A16265T T16519C                                                                                                                                                                                                                                                                                                                                                                                     |
| NA19172 | A73G C150T A189G A200G G207A A263G A750G A1438G A1821G T1822C A2706G T3396C T4218C A4769G C5601T C7028T C7082T C7819A T8167C A8527G T8612C A8701G A8860G C8932T T9540C T9950C A10398G C10670T T10873C G11440A G11719A C12705T A14206G C14766T A14769G G15301A A15326G T15514C 15942delT T16209C C16223T A16235G G16274A C16292T T16311C T16519C                                                                                                                                                                                                                                                                                                                                       |
| NA19175 | A73G A263G A281G 514delC 515delA A750G A1438G C2332T A2706G C3450T A4769G A5028G G5773A T6221C C7028T A8701G A8860G T9117C C9449T A9531G T9540C A10086G G10373A A10398G T10873C A11002G G11719A G11843A C12705T A13105G C13914A C14766T G15301A A15311G A15326G A15824G 15942delT G16129A G16145A C16223T C16278T T16362C T16519C                                                                                                                                                                                                                                                                                                                                                     |
| NA19179 | A73G T146C A235G A263G T292N A512N A515N A750G 956delC A1438G T1809C A2706G A3348G A4769G C5554A G6182N C7028T G7805A A8860G A11272G A11467G G11719A A12308G G12372A A14179G C14766T A15326G A15380G C15790T T16172C A16183N T16189C A16219G C16278T                                                                                                                                                                                                                                                                                                                                                                                                                                  |
| NA19181 | A73G A263G C309N T310N G316A 514delC 515delA A750G A1438G C2332T                                                                                                                                                                                                                                                                                                                                                                                                                                                                                                                                                                                                                      |

|         |                                                                                                                                                                                                                                                                                                                                                                                                                                                                                                                           |
|---------|---------------------------------------------------------------------------------------------------------------------------------------------------------------------------------------------------------------------------------------------------------------------------------------------------------------------------------------------------------------------------------------------------------------------------------------------------------------------------------------------------------------------------|
|         | A2706G C3450T A4769N G5773A T6221C A6860N C7028T T7193N A8701G A8860G C9009T C9449T T9540C A10086G G10373A A10398G T10873C A11002G G11719A C12417N A12418N G12561A C12705T A13105G T13437C C13914A C14766T G15301A A15311G A15326G A15824G 15942delT G16145A C16223T C16278T T16362C T16519C                                                                                                                                                                                                                              |
| NA19182 | A73G A189G A200G A234G A263G C309N A750G A1438G T1822C A2706G T3396C T4218C A4769G C5601T C7028T C7819N C8410T A8527G A8701G A8860G C8932T T9540C T9950C C10070T A10398G T10873C G11440A G11719A C12705T C14766T A14769G G15301A A15326G T15514C 15942delT G16129A T16209C C16223T C16292T C16295T T16311C T16519C                                                                                                                                                                                                        |
| NA19184 | A73G C150T A189G A200G A263G A750G G1018A A1438G T2352C 2457delA A2706G A4769G T6221C C6587T C7028T A8701G A8860G T9540C T10235C A10398G A10819G T10873C G11719A C12705N A13105G A14152G T14212C C14766T A14926G G15301A A15326G T15670C T15942C C16223T C16256T 16323delT C16327T                                                                                                                                                                                                                                        |
| NA19185 | A73G 149delT C150T T152C C182T T195C C198T T204C A263G C418T A750G G769A G1018A A1438G G1442A C1706T C2332T A2358G T2416C A2706G C3594T A4104G A4158G T4370C A4767G A4769G C5027T C5331A T5814C G6026A C6713T C7028T C7256T G7521A T7624A C8080T G8206A G8387A A8701G G8856A A8860G A9221G T9540C T10115C A10398G T10828C T10873C G11719A T11944C G12236A C12705T A12948G C13370T G13590A C13650T C13924T A14059G C14766T G15110A G15217A G15301A A15326G C16114A G16129A G16213A C16223T C16278T C16355T T16362C G16390A |
| NA19187 | A73G T146C T152C T195C A244G A263G C340T 514delC 515delA G709A A750G G769A G1018A A1438G A2220T 2457delA A2706G G3918A A4206G A4769G A5128G G6260A C7028T G7805A T8104C G8292A A8343G A8701G A8860G T9540C A9855G T10265C A10398G T10873N G11719A T12438C T12609C C12705N A13470G C14766T G15301A A15326G A16051G C16114T T16189C C16192N C16223T A16293T T16311C A16316G C16355T T16362C A16399G T16519C                                                                                                                 |
| NA19189 | A73G T146C T152C T195C A263G A750G G769A G1018A A1438G T1780C T2416C A2706G C2789T C3594T A4104G A4769G A5581G C7028T T7175C C7256T C7274T A7516G G7521A A7771G G8206A A8449G A8701G A8860G T9098C A9221G T9540C T10115C A10398G T10873C G11719A G11914A T11944C A12693G C12705T G13590A C13650T A13803G A14566G C14766T G15301A A15326G T15784C A16182C A16183C T16189C C16223T C16278T C16294T A16309G G16390A T16519C                                                                                                  |
| NA19190 | A73G T152C C182T G185T A189G T195C A200G G247A A263G A357G 514delC 515delA G709A T710C A750G G769A T825A G1018A T1738C T2352C A2706G G2758A A2768G T2885C T3308C C3594T G3666A G3693A A4104N A4769G A5036G G5046A T5393C T5655C C6548T T6827C A6989G C7028T A7055G A7146G C7256T T7389C G7521A C7867T A8248G C8468T C8655T A8701G A8860G T9540C A10398G G10688A T10810C T10873C G11719A T12519C C12705T A13105G C13506T C13650T T13789C C13880A T14178C A14203G                                                           |

|         |                                                                                                                                                                                                                                                                                                                                                                                                                                                                                                                                                                                                                                      |
|---------|--------------------------------------------------------------------------------------------------------------------------------------------------------------------------------------------------------------------------------------------------------------------------------------------------------------------------------------------------------------------------------------------------------------------------------------------------------------------------------------------------------------------------------------------------------------------------------------------------------------------------------------|
|         | G14560A C14766T A14769G G15077A C15103T T15115C A15326G T16126C<br>C16187T T16189C C16223T C16264T C16270T C16278T A16293G T16311C<br>A16497G T16519C                                                                                                                                                                                                                                                                                                                                                                                                                                                                                |
| NA19195 | A73G C150T T195C C198T A263G A750G A1438G T2352C A2706G 3167insC<br>C3945T A4769G T4823C T6413C C7028T T8614C T8618C A8701G A8860G<br>T9540C A10398G A10819G T10873C G11719A C12705T A13105G G14198A<br>T14212C C14766T G14869A G14905A A15076G G15301A A15326G C16223T<br>T16311C C16320T                                                                                                                                                                                                                                                                                                                                           |
| NA19196 | A73G C150T G185A T195C C198T A263G G499A T593C A750G A1438G T2352C<br>A2706G A2768G A4769G T4823C T6413C C7028T A8701G A8860G T9540C<br>A10398G A10819G T10873C G11719A C12705T A13105G T14212C C14766T<br>G14869A G14905A G15301A A15326G C16223T C16290T C16320T A16399G<br>T16519C                                                                                                                                                                                                                                                                                                                                                |
| NA19197 | A73G T146C C150T T152C C182T A183G T195C C198T T204C A263G A750G<br>G769A G1018A A1438G G1442A C1706T C2332T A2358G T2416C G2436A<br>A2706G C3594T A4104G A4158G T4218C T4370C A4767G A4769G C5027T<br>C5331A T5814C T6614C C6713T A6806G C7028T C7256T G7521A T7624A<br>C8080T G8206A G8387A T8503C A8701G A8860G A9221G T9540C T10115C<br>A10398G T10873C G11719A T11944C G12236A C12705T A12948G G13552A<br>G13590A C13650T A14059G C14766T G14831A G15110A G15217A G15301A<br>A15326G C16114A G16129A G16213A C16223T C16278T G16390A                                                                                            |
| NA19198 | A73G T152C C182T G185T A189G T195C G247A A263G A357G 514delC<br>515delA G709A T710C A750G G769A T825A G1018A T1738C T2352C A2706G<br>G2758A A2768G T2885C T3308C C3594T G3666A G3693A A4104G A4769G<br>A5036G G5046A T5393C T5655C C6548T T6827C A6989G C7028T A7055G<br>A7146G C7256T T7389C G7521A C7867T A8248G C8468T C8655T A8701G<br>A8860G T9540C A10398G G10688A T10810C T10873C G11719A T12519C<br>C12705T A13105G C13506T C13650T T13789C C13880A T14178C A14203G<br>G14560A C14766T A14769G G15077A C15103T T15115C A15326G T16126C<br>C16187T T16189C C16223T C16264T C16270T C16278T A16293G T16311C<br>C16355T T16519C |
| NA19200 | A73G C150T T195C A263G 310insC A1438G T2352C A2706G G4655A G5262A<br>T6524C C7028T A8701G T9540C G9554A A10398G T10667C A10816G A10819G<br>T10873C G11719A A12248G C12705T A13101C C13197T A13651G T14212C<br>C14766T G15301A A15326G G15812A C16223T A16265T T16519C                                                                                                                                                                                                                                                                                                                                                                |
| NA19201 | A73G T146C C150T C182T T204C A263G 310insC A479G C568T G719A A750G<br>G769A C954T G1018A G1211A A1438G T2416C A2706G G3316A A3537G<br>C3594T A4104N A4562G A5069T T6014C T6221C C7028T G8206A T8383C<br>A8701G G9163A A9221G A9377G T9540C C9971T T10115C A10398G T10873C<br>G11719A T11935C T12189N C12705T T13356C G13590A A13638G C13650T<br>G13708A T14299C C14766T G15301A A15326G A15592G T15697C G15734A<br>T15889C C16111A G16145A C16184T C16223T C16239T C16278T C16292T<br>C16355T G16390A A16399G C16400T T16519C                                                                                                        |
| NA19204 | A73G C150T A189G T195C A263G A750G A1438G T2352C A2706G T4823C                                                                                                                                                                                                                                                                                                                                                                                                                                                                                                                                                                       |

|         |                                                                                                                                                                                                                                                                                                                                                                                                                                                                                                                                                                                                   |
|---------|---------------------------------------------------------------------------------------------------------------------------------------------------------------------------------------------------------------------------------------------------------------------------------------------------------------------------------------------------------------------------------------------------------------------------------------------------------------------------------------------------------------------------------------------------------------------------------------------------|
|         | T5082C T6044C C7028T A8701G T9540C A10398G A10819G T10873C G11719A C12705T A13105G T14212C C14766T G14869A G14905A G15301A A15326G C16223T A16258T C16320T T16519C                                                                                                                                                                                                                                                                                                                                                                                                                                |
| NA19207 | A73G T152C C182T G185T A189G T195C G247A A263G A357G 514delC 515delA G709N T710C A750G G769A T825A G1018A T1738C T2352C A2706G G2758A A2768G T2885C T3308C C3594T G3666A G3693A A5036G G5046A T5393C T5655C C6548T T6827C A6989G C7028T A7055G T7389C C7867T A8248G C8468T C8655T A8701G T9540C A10398G G10688A T10810A T10873C G11719A T12519C C12705T A13105G C13506T C13650T T13789C C13880A G13980A T14178C A14203G G14560A C14766T A14769G T15115C A15326G T16126C C16187T T16189C C16223T C16264T C16270T C16278T A16293G T16311C T16519C                                                   |
| NA19209 | A73G T146C C150T T152N C182T A183G T195N C198T T204C A263G A385G C418T 514delC 515delA A750G G769A G1018A A1438G G1442A C1706T C2332T A2358G T2416C A2706G C3594T C4011T A4104N A4158G T4370C A4767G C5027T C5331A T5814C G6026A T6481C A6629G C6713N C7028T T7624A C8080T G8206A G8387A A8701G A9221G T9540C T10115C A10398G T10828C T10873C G11719A T11944C G12236A C12705T A12948G G13590A C13650T C13924T A14059G C14766T G15110A G15217A G15301A A15326G C16114A G16129A G16213A C16223T C16278T T16362C G16390A                                                                             |
| NA19210 | A73G T152C C182T G185T A189G T195C G247A A263G A357G 514delC 515delA G709A T710C A750G G769A T825A G1018A T1738C T2352C A2706G G2758A A2768G T2885C T3308C C3594T G3666A G3693A A4104G A4769G A5036G G5046A T5393C T5655C C6548T T6827C A6989G C7028T A7055G A7146G C7256T T7389C G7521A C7867T A8248G C8468T C8655T A8701G A8860G T9540C A10398G G10688A T10810C T10873C G11719A T12519C C12705T A13105G C13506T C13650T T13789C C13880A G13980A T14178C A14203G G14560A C14766T A14769G G15077A T15115C G15152A A15326G T16126C C16187T T16189C C16223T C16264T C16270T C16278T T16311C T16519C |
| NA19213 | A73G C150T A189G A200G A263G T711C A750G A1438G T1822C A2706G T3396C T4218C A4769G C5601T A6806G C7028T A7158G C7349T C7819A A8527G A8701G A8860G C8932T T9540C T9950C A10398G T10493C T10873C G11440A G11719A C12705T T14757C C14766T A14769G G15301A A15326G T15514C 15942delT T16209C C16223T C16292T T16311C T16519C                                                                                                                                                                                                                                                                          |
| NA19214 | A73G C150T T195C A263G G499A A750G A1438G T2352C A2706G A4164G A4769G T4823C T6413C C7028T A8701G A8860G T9540C A10398G A10819G T10873C G11719A C12705T A13105G T14212C C14766T G14869A G14905A G15301A A15326G C16223T C16320T A16399G T16519C                                                                                                                                                                                                                                                                                                                                                   |
| NA19216 | C64T A93G G185A A189G A200G T236C G247A A263G 514delC 515delA A750G G769A T825A G1018A C1048T A1438G A2245C A2706G G2758A T2885C C3516A C3594T T3866C A4104G C4312T T4586C A4769G T5096C G5231A T5442C G5460A C5603T T6185C C7028T A7146G C7256T G7521A C8428T C8468T A8566G C8655T A8701G A8860G C9042T A9347G T9540C G9755A                                                                                                                                                                                                                                                                     |

|         |                                                                                                                                                                                                                                                                                                                                                                                                                                                                                                                                                                                                                              |
|---------|------------------------------------------------------------------------------------------------------------------------------------------------------------------------------------------------------------------------------------------------------------------------------------------------------------------------------------------------------------------------------------------------------------------------------------------------------------------------------------------------------------------------------------------------------------------------------------------------------------------------------|
|         | C9818T A10398G G10589A C10664T G10688A T10810C T10873C T10915C<br>G11176A A11641G G11719A G11914A G12007A C12705T A12720G A13105G<br>A13276G C13506T C13650T T14308C C14329T C14766T C15136T A15326G<br>G15431A G16129A C16148T C16168T T16172C C16187N C16188G T16189C<br>C16223T A16230G T16311C C16320T T16362C                                                                                                                                                                                                                                                                                                           |
| NA19217 | A73G C150T A189G A200G A263G T593C A750G T985C A1438G T2352C<br>A2706G G4048A A4769G T6221C C6587T C7028T A8701G A8860G T9540C<br>A10398G A10819G T10873N G11719A A12046G C12705T A14152G T14212C<br>C14766T A15160G G15301A A15326G T15670C T15942C C16223T C16327T                                                                                                                                                                                                                                                                                                                                                         |
| NA19220 | A73G T152C A263G 514delC 515delA A750N T921C A1438G A2706G A4769G<br>G5147A T5580C T6680C C7028T A7424G T8618C A8701G A8860G G8865A<br>T9540C A10398G T10873N G11719A C12705N A13105G T13886C C14284T<br>C14766T G14831A C15058T A15061G G15301A A15326G T16124C C16223T<br>C16291T                                                                                                                                                                                                                                                                                                                                          |
| NA19222 | A73G A263G A750G A1438G C2332T A2706G C3450T A4769G G5773A T6221C<br>C7028T C7991N A8701G A8860G C9449T T9540C A10086G G10373A A10398G<br>T10873C A11002G G11719A G12561A C12705T A13105G C13914A C14766T<br>G15301A A15311G A15326G A15824G 15942delT G16145A C16192T C16223T<br>C16278T T16362C T16519C                                                                                                                                                                                                                                                                                                                    |
| NA19223 | A73G T152C C182T G185T A189G T195C G247A A263G A357G 514delC<br>515delA G709A T710C A750G G769A T825A G1018A T1738C T2352C A2706G<br>G2758A A2768G T2885C T3308C C3594T G3666A G3693A A4104G A4769G<br>A5036G G5046A T5393C T5655C C6548T T6827C A6989G C7028T A7055G<br>A7146G C7256T T7389C G7521A C7867T A8248G C8468T C8655T A8701G<br>A8860G T9540C A10398G G10688A T10810C T10873C G11719A T12519C<br>C12705T A13105G C13506T C13650T T13789C C13880A G13980A T14178C<br>A14203G G14560A C14766T A14769G T15115C A15326G T16126C C16187T<br>T16189C C16223T C16264T C16270T C16278T A16293G T16311C T16519C<br>C16537N |
| NA19225 | A73G G143A T146C T152C T195C A263G A750G G769A G1018A A1438G<br>T2416C A2706G C2789T C3594T A4104G 4315delA A4769G G5147A C7028T<br>T7175C C7256T C7274T G7521A G7762A A7771G G8206A A8701G A8860G<br>A9221G T9540C T10115C A10398G T10873C G11719A G11914A T11944C<br>A12693G C12705T G13590A C13650T T13768C A13803G A14566G C14766T<br>G15301A A15326G T15784C T16086C T16189C C16192N C16223T C16278T<br>T16288C C16294T A16309G G16390A                                                                                                                                                                                 |
| NA19228 | A73G G143A T146C T152C T195C A263G G316A G513A 514delC 515delA<br>A750G G769A G1018A A1438G T2416C A2706G C2789T G3010A C3594T<br>A4104G A4769G A6663G C7028T T7175C C7256T C7274T G7521A A7771G<br>G8206A A8701G A8860G A9221G T9540C T10115C A10398G T10873N C10903T<br>G11719A G11914A T11944C A12693G C12705T G13590A C13650T A13803G<br>A14566G C14766T G15301A A15326G T15784C A15901G A15924G C16193T<br>G16213A C16223T C16239T G16244A C16278T C16294T A16309G G16390A                                                                                                                                              |
| NA19229 | A73G A93G T146C C150T T152C C182T T195C C198T A263G C325T 514delC                                                                                                                                                                                                                                                                                                                                                                                                                                                                                                                                                            |

|         |                                                                                                                                                                                                                                                                                                                                                                                                                                                                                                                                                 |
|---------|-------------------------------------------------------------------------------------------------------------------------------------------------------------------------------------------------------------------------------------------------------------------------------------------------------------------------------------------------------------------------------------------------------------------------------------------------------------------------------------------------------------------------------------------------|
|         | 515delA T680C G709A A750G G769A G1018A T1040C A1438G G1442A C2332T T2416C A2706G T3200A C3594T A4104G A4769G C7028T C7256T G7521A T7624A G8206A A8701G A8860G A9221G T9540C T10115C A10398G T10873C G11719A T11944C G12236A C12705T G13590A C13650T G13928C G13958C C14766T G15110A G15217A G15301A A15326G C15849T C16223T C16264T C16278T G16390A T16519C                                                                                                                                                                                     |
| NA19235 | A73G C150T T152C T195C A263G A750G A1117G A1438G T2352C A2706G A4769G C7028T A8701G A8860G T9540C A10398G A10819G T10873C G11719A C12705T T14212C C14766T G14905A G15301A A15326G T16172C A16183C T16189C C16223T C16320T T16519C                                                                                                                                                                                                                                                                                                               |
| NA19236 | A73G C150T T152C T195C A263G A750G A1438G T2352C A2706G A4769G C7028T A8701G A8860G T9540C A10398G A10819G T10873C G11719A C12705T T14020C T14212C C14766T G14905A G15301A A15326G T16172C A16183C T16189C C16223T C16266T C16320T T16519C                                                                                                                                                                                                                                                                                                      |
| NA19238 | A73G C150T T152C T195C A263G A750G A1438G T2352C A2706G A4769G G6261A C7028T A8701G A8860G T8999C T9540C A10398G A10819G T10873C G11719A C12705T T13015C T14212C C14766T G14905A G15301A A15326G T16172C A16183C T16189C C16223T A16293T C16320T T16519C                                                                                                                                                                                                                                                                                        |
| NA19239 | A73G G143A T146C T152C T195C A263G A750G G769A G1018A A1438G T2416C A2706G C2789T C3594T A4104G A4767G A4769G C7028T T7175C C7256T C7274T T7300C G7521A A7771G G8206A A8701G A8860G A8869G A9221G A9410G T9540C T10115C A10398G T10873C G11719A G11914A T11944C A12693G C12705T G13590A C13650T A13803G T13818C G14560A A14566G C14766T G15301A A15326G C15626T T15784C T16189C C16223T C16278T C16294T A16309G G16390A                                                                                                                         |
| NA19247 | A73G T146C C150T T152C C182T G185C T195C C198T T204C A263G T408A 573insC A750G G769A G1018A A1438G G1442A C1706T C2332T A2358G T2416C A2706G A2768G C3594T A4104G A4158G T4370C A4767G A4769G C5027T C5331A T5814C A6284G C6713T C7028T C7256T G7521A T7624A C8080T G8206A G8387A A8701G A8860G A9221G T9540C T10115C A10398G T10873C G11150A G11719A G11914A T11944C T12011C G12236A C12705T A12948G G13590A C13650T A14059G C14766T G15110A G15217A G15301A A15326G 15939insT C16114A G16129A G16213A C16223T C16278T T16311C G16390A T16519C |
| NA19248 | A73G T146C C150T T152C C182T T195C C198T T204C G207A A263G A750G G769A G1018A A1438G G1442A C1706T C2332T A2358G T2416C A2706G C3594T A4104G A4158G C4185T T4370C A4767G A4769G C5027T C5331A G5744A T5814C C6713T C7028T C7256T G7521A T7624A C8080T G8206A G8387A A8701G A8860G A8925G A9221G T9540C T10115C A10398G T10873C G11719A T11944C G12236A C12705T A12948G G13590A C13650T A14059G G14544A C14766T G15110A G15217A A15236G G15301A 15939insT C16114A G16129A G16213A C16223T C16278T G16390A                                        |
| NA19250 | A73G T152C C182T G185T A189G T195C G247A A263G A357G 514delC 515delA G709A T710C A750G G769A T825A G1018A T1738C T2352C A2706G                                                                                                                                                                                                                                                                                                                                                                                                                  |



|         |                                                                                                                                                                                                                                                                                                                                                                                                                                                                                                                                                                                                                                                                                                 |
|---------|-------------------------------------------------------------------------------------------------------------------------------------------------------------------------------------------------------------------------------------------------------------------------------------------------------------------------------------------------------------------------------------------------------------------------------------------------------------------------------------------------------------------------------------------------------------------------------------------------------------------------------------------------------------------------------------------------|
|         | G2758A A2768G T2885C T3308C C3594T G3666A G3693A A4104G A4769G A5036G G5046A T5393C T5655C C6548T T6827C A6989G C7028T A7055G A7146G C7256T T7389C G7521A C7867T C7915T A8248G C8468T C8655T A8701G A8860G T9540C A10398G G10688A T10810C T10873N T11254C G11719A T12519C C12705T A13105G C13506T C13650T T13789C C13880A G13980A T14178C A14203G G14560A C14766T A14769G T15115C A15326G T16126C C16187N T16189C C16223T C16264T C16270T A16293G T16311C T16519C                                                                                                                                                                                                                               |
| NA19253 | A73G T146C C150T T152C C182T T195C C198T T204C A263G G709A A750G G769A G1018A A1438G G1442A C1706T C2332T A2358G T2416C A2706G C3594T A4104G A4158G T4370C A4767G A4769G C5027T C5331A T5814C T6614C C6713T A6806G C7028T C7256T G7521A T7624A C8080T G8206A G8387A T8503C A8701G G8790A A8860G A9221G A9350G T9540C T10115C A10398G T10873C G11719A T11944C G12236A C12705T A12948G G13590A C13650T A13966G A14059G C14407T C14766T G15110A G15217A G15301A A15326G C16114A G16129A G16213A C16223T C16278T C16354T G16390A                                                                                                                                                                    |
| NA19256 | A73G C151T T152C C182T C186A A189C G247A A263G 310insC G316A 514delC 515delA A750G G769A T825A G1018A A1438G 2395delA A2706G G2758A T2885C T3096C C3594T G3666A A4104G A4769G A5951G T6071C T6221A T6297C A6353G G6917A C7028T A7146G C7256T T7389C G7521A G7805A A7844G G8027A G8251A C8468T C8655T A8701G A8860G A9058G A9072G T9540C A10398G G10586A G10688A T10810C T10873C C11302T G11719A C12705T A12810G A13105G A13485G C13506T C13650T T13789C C13981T T14000A C14124T A14128G T14178C G14560A C14766T C14794T G14831A C14911T A15226G A15244G A15326G T15905C A15924G C15978T T16086C C16104T G16129A A16163G C16187T T16189C C16223T C16278T A16293G C16294T T16311C C16360T T16519C |
| NA19257 | A73G A263G 514delC 515delA A750G A1438G A2706G C3450T G4659A A4769G G5773A T6221C G6249A C7028T G7859A T8279C A8701G A8860G C9449T T9540C T9647C A10086G G10373A A10398G T10873C A11002G G11719A C12705T A13105G C13914A C14766T G15301A A15311G A15326G A15824G 15942delT T16124C C16223T C16278T T16362C T16519C                                                                                                                                                                                                                                                                                                                                                                              |
| NA19259 | A73G T146C C150T T152C T195C A200G A244G A263G G513A G709A A750G G769A G1018A A1438G A2706G G3918A A4769G A5128G G6260A C7028T G7805A T8104C T8227C A8701G A8860G T9540C A9855G T10265C T10389C A10398G T10873C T11204C G11719A G11914A T12354C T12438C T12609C C12705T T12903C A13470G C14766T G15217A G15301A A15326G T16093G C16223T C16287A A16293T C16301T T16311C C16355T T16362C A16399G                                                                                                                                                                                                                                                                                                 |
| NA19260 | A73G C150T T195C A263G 514delC 515delA A1438G C2000T T2352C A2706G G4655A A4769G G5262A T6524C C7028T G7337A A8701G A8860G T9540C G9554A A10398G T10667C A10816G A10819G T10873C G11719A A12248G C12705T A13101C C13197T A13651G T14212C C14766T G15301A A15326G G15812A C16223T A16265T T16519C                                                                                                                                                                                                                                                                                                                                                                                                |
| NA19262 | A73G C150T T152C A263G 514delC 515delA A750G T921C A1438G A2706G                                                                                                                                                                                                                                                                                                                                                                                                                                                                                                                                                                                                                                |

|         |                                                                                                                                                                                                                                                                                                                                                                                                                                                                                                                                                                                                                                                                       |
|---------|-----------------------------------------------------------------------------------------------------------------------------------------------------------------------------------------------------------------------------------------------------------------------------------------------------------------------------------------------------------------------------------------------------------------------------------------------------------------------------------------------------------------------------------------------------------------------------------------------------------------------------------------------------------------------|
|         | T4553C A4769G G5046A G5147A T5561C T6680C C7028T A7424G T8618N<br>A8701G A8860G T9540C A10398G T10873C G11719A C12461T C12705T<br>A13105G T13886C C14284T C14766T G15301A A15326G T15514C T16124C<br>C16223TA16235N                                                                                                                                                                                                                                                                                                                                                                                                                                                   |
| NA19266 | A73G T146C T152C T195C A263G A750G G769A G1018A A1438G T2416C<br>A2706G C2789T C3594T G3918A A4104G A4769G A5285G T6152C C7028T<br>T7175C C7256T C7274T G7521A A7771G G8206A A8701G A8860G A9221G<br>T9540C T10115C A10398G T10873C G11719A G11914A T11944C A12142G<br>A12693G C12705T G13590A C13650T A13803G A14566G C14766T A15244G<br>G15301A A15326G C15391T T15629C T15784C C16223T C16278T C16294T<br>A16309G T16368C G16390A T16519C                                                                                                                                                                                                                          |
| NA19307 | A73G A263G A750G A1438G A2706G C3450T A4769G G5773A T6221C C7028T<br>A8701G A8860G C9449T T9540C A10086G G10373A A10398G T10873C<br>A11002G G11719A A11800G C12705T A13105G C13914A C14766T G15301A<br>A15311G A15326G A15824G G15883A 15942delT T16093N T16124C C16223T<br>C16278T T16362C T16519C                                                                                                                                                                                                                                                                                                                                                                   |
| NA19308 | A73G C182T T195C G247A A263G 455insT 455insT 455insC 514delC 515delA<br>G709A A750G G769A T825A A851G G930A G1018A A1438G T1822C A2706G<br>T3423C C3594T A4104G C4496T A4769G T5004C T5029C C5111T G5147A<br>A5656G G6182A T6297C C7028T C7256T A7424G G7521A A7972G G8155A<br>A8188G C8582T C8655T A8701G C8754T A8860G G9305A G9329A T9540C<br>T9899C A10398G G10688A T10810C T10873C T11025C G11719A C11881T<br>G12236A C12432T C12705T A12950G A13105G C13506T C13650T A13722G<br>T14212C C14239T T14581C C14766T G14905A T14971C G15217A A15326G<br>G15884A G16129A C16148T A16166G 16183delA C16184A T16189C C16223T<br>G16274A C16278T T16311C C16355T T16362C |
| NA19309 | A73G C150T T195C A263G A750G A1438G T2352C A2706G A4769G C7028T<br>A8701G A8860G T9540C A10398G A10819G T10873C G11719A C12705T<br>T14212C C14766T G14905A G15301A A15326G T16126C T16172C 16183delA<br>C16184A T16189C C16223T C16320T T16519C                                                                                                                                                                                                                                                                                                                                                                                                                       |
| NA19310 | A73G A263G A750G A1438G A2706G C3450T A4769G G5773A T6221C C7028T<br>A8701G A8860G T8978C C9449T T9540C A10086G G10373A A10398G T10873C<br>A11002G G11719A A11800G C12705T A13105G C13914A C14766T G15301A<br>A15311G A15326G A15824G G15883A 15942delT T16093C T16124C C16223T<br>C16278T T16362C T16519C                                                                                                                                                                                                                                                                                                                                                            |
| NA19311 | C64T A93G T152C G185A A189G A200G T236C G247A A263G A368G A750G<br>G769A T825A G1018A C1048T A1438G A2245G A2706G G2758A T2885C<br>C3516A C3594T T3866C A4104G C4312T T4586C A4769G T5096C G5231A<br>T5442C G5460A C5603T T5618C T6185C C7028T A7146G C7256T G7521A<br>C8428T C8468T A8566G C8655T A8701G A8860G C9042T A9347G T9540C<br>G9755A C9818T A10398G G10589A C10664T G10688A T10810C T10873C<br>T10915C G11176A A11641G G11719A G11914A G12007A C12705T A12720G<br>A13105G A13276G C13506T C13650T T14308C C14766T C15136T A15326G<br>G15431A G16129A C16148T C16168T T16172C C16187T C16188G T16189C                                                       |

|         |                                                                                                                                                                                                                                                                                                                                                                                                                                                                                                                                                                                                                                                                                                                                                                               |
|---------|-------------------------------------------------------------------------------------------------------------------------------------------------------------------------------------------------------------------------------------------------------------------------------------------------------------------------------------------------------------------------------------------------------------------------------------------------------------------------------------------------------------------------------------------------------------------------------------------------------------------------------------------------------------------------------------------------------------------------------------------------------------------------------|
|         | C16223T A16230G T16311C C16320T                                                                                                                                                                                                                                                                                                                                                                                                                                                                                                                                                                                                                                                                                                                                               |
| NA19312 | C64T A93G T152C A189G T204C G207A T236C G247A A263G 514delC 515delA A750G G769A T825A G1018A C1048T A1438G A2245G A2706G G2758A T2885C T2924C C3516A C3594T A4104G C4312T T4586C A4769G G5147A G5231A T5442C G5460A C5603T A5711G T6185C G6257A C7028T A7146G C7256T G7521A 8281delC 8282delC 8283delC 8284delC 8285delC 8286delT 8287delC 8288delT 8289delA T8311C C8428T A8460G C8468T A8566G C8655T A8701G A8860G C9042T A9347G T9540C A9545G G9554A G9755A C9818T A10398G G10589A C10664T G10688A T10810C T10873C T10915C C11143T A11172G G11176A A11641G G11719A G11914A G12007A C12705T A12720G A13105G C13116T A13276G C13506T C13650T T14308C A14755G C14766T C15136T A15326G G15431A C16148T T16172C C16187T C16188G T16189C C16223T A16230G T16311C C16320T T16519C |
| NA19313 | A73G G143A T146C T152C A189G T195C T199C A263G A750G G769A G1018A A1438G T2416C A2706G C2789T C3594T A4104G A4769G C6713T C7028T T7175C C7256T C7274T G7521A A7771G G8206A A8701G A8860G A9221G T9540C T10115C A10398G T10873C G11719A G11914A T11944C G11963A A12693G C12705T G13590A A13803G A14566G C14766T A15258G G15301A A15326G T15784C G16145A A16183C T16189C C16223T T16224C C16278T C16294T G16390A                                                                                                                                                                                                                                                                                                                                                                |
| NA19315 | A73G C150T T195C C198T A263G A1438G C2000T T2352C A2706G G4655A A4769G G5262A G6261A T6524C C7028T A8701G A8860G T9540C G9554A A10398G T10667C A10816G A10819G T10873C G11719A A12248G C12705T A13101C C13197T A13651G T14212C C14766T G15301A A15326G G15812A C16223T C16260T A16265T T16519C                                                                                                                                                                                                                                                                                                                                                                                                                                                                                |
| NA19316 | A73G T152C A263G A750G T921C A1438G G2304A A2706G G4048A A4769G G5147A T6680C C7028T A7424G C7648T T8618C C8684T A8701G A8860G T9540C A10398G T10873C G11719A G11887A C12705T A13105G T13886C C14284T C14766T G15301A A15326G T16124C C16223T T16311C                                                                                                                                                                                                                                                                                                                                                                                                                                                                                                                         |
| NA19317 | A73G C151T T152C C182T T195C G247A A263G 455insT 455insT 455insC G513A 514delC 515delA G709A A750G G769A T825A A851G G930A G1018A A1438G T1822C A2706G T3423C C3594T A4104G C4137T C4496T A4769G C5111T G5147A A5656G G6182A T6297C A6527G C7028T C7256T A7424G G7521A A7972G G8155A A8188G C8582T C8655T A8701G C8754T A8860G G9305A G9329A T9540C A10006G A10398G G10688A T10810C T10873C T11025C G11719A C11881T G12236A C12432T C12705T T12873C A12950G A13105G C13506T C13650T A13722G T14212C C14239T T14581C C14766T G14905A T14971C G15217A A15326G G15884A T16093N G16129A C16148T A16166G 16183delA C16187T T16189C C16223T C16278T T16311C C16355T T16362C                                                                                                         |
| NA19318 | A73G A200G G247A A263G 514delC 515delA A750G G769A T825A G1018A A1438G T1717C G1719A T2080C C2484T A2706G T3423C A3564G C3594T G3918A G4092A A4104G G4655A C4676T A4769G T4967C A6527G C7028T A7076G C7256T G7521A A7765G G7789A C8655T A8701G A8860G T9018C                                                                                                                                                                                                                                                                                                                                                                                                                                                                                                                  |

|         |                                                                                                                                                                                                                                                                                                                                                                                                                                                                                                                                                                                                                                                                                                                                                                                                                     |
|---------|---------------------------------------------------------------------------------------------------------------------------------------------------------------------------------------------------------------------------------------------------------------------------------------------------------------------------------------------------------------------------------------------------------------------------------------------------------------------------------------------------------------------------------------------------------------------------------------------------------------------------------------------------------------------------------------------------------------------------------------------------------------------------------------------------------------------|
|         | T9540C T9653C T10101C A10398G G10688A T10810C T10873C C11266T<br>T11287C G11719A T11809C C12432T A12507G C12705T G12940A A13050G<br>C13383T C13506T T13602C C13650T C14766T A15236G A15326G C15418T<br>G16129A A16166G C16187T T16189C C16223T A16254G C16278T C16291T<br>T16368C C16527T                                                                                                                                                                                                                                                                                                                                                                                                                                                                                                                           |
| NA19319 | A73G C150T T195C A263G 514delC 515delA A1438G C2000T T2352C A2706G<br>G4655A A4769G G5262A T6524C C7028T A8701G A8860G T9540C A9545G<br>G9554A A10398G T10667C A10816G A10819G T10873C G11719A T11827C<br>A12248G C12705T A13101C C13197T A13651G T14212C C14766T G15301A<br>A15326G G15812A C16223T A16265T T16519C C16527T                                                                                                                                                                                                                                                                                                                                                                                                                                                                                        |
| NA19320 | A73G A263G 514delC 515delA A750G A1438G A2706G C3450T A4769G G5773A<br>T6221C C7028T T7501C G7830A A8701G A8860G C9449T T9540C A10086G<br>G10373A A10398G T10873C A11002G G11719A A11800G C12705T A13105G<br>C13914A C14766T G15301A A15311G A15326G A15824G G15883A 15942delT<br>T16124C C16223T C16278T T16362C T16519C                                                                                                                                                                                                                                                                                                                                                                                                                                                                                           |
| NA19321 | A73G A263G 310insC 514delC 515delA A750G A1438G A2706G C3450T A4769G<br>G5773A T6221C C7028T A8701G A8860G C9449T T9540C A10086G G10373A<br>A10398G T10873C A11002G G11719A A11800G C12705T A13105G C13914A<br>C14766T G15301A A15311G A15326G A15824G G15883A 15942delT T16093C<br>T16124C C16223T C16278T T16362C T16519C                                                                                                                                                                                                                                                                                                                                                                                                                                                                                         |
| NA19324 | A73G A263G A373G 514delC 515delA A750G A1438G A2706G C3450T A4769G<br>G5773A T6221C C7028T A8701G A8860G C9449T T9540C A10086G G10373A<br>A10398G T10873C A11002G G11719A A11800G G12684A C12705T A13105G<br>C13914A C14766T G15301A A15311G A15326G A15824G G15883A 15942delT<br>T16124C C16223T C16278T T16362C T16519C                                                                                                                                                                                                                                                                                                                                                                                                                                                                                           |
| NA19327 | G143A T146C T152C G185A A189G G247A A263G 514delC 515delA A750G<br>G769A T825A G1018A C1048T A1438G T1822C A2245G A2706G G2758A<br>A2879G T2885C C3516A C3594T A4104G C4312T T4586C T4688C A4769G<br>C4964T T5063C G5147A T5442C C5603T G5913A T6185C C7028T A7061G<br>A7146G T7148C C7256T G7521A T7660C C8468T C8655T A8701G A8860G<br>C9042T A9347G T9540C T9581C C9620T G9755A C9818T A10398G G10589A<br>C10664T T10810C T10873C T10915C A11641G G11719A C11782T G11914A<br>G12007A C12092A A12151G G12630A A12699G C12705T A12720G A13105G<br>A13276G A13470G C13506T G13590A C13650T C14109T G14305A G14364A<br>C14482T C14620T C14766T C15136T A15326G G15431A A15607G T15672C<br>T15852C C16052T G16129A C16169T C16187T T16189C C16223T A16230G<br>C16278T C16290T T16311C T16325C C16327T T16368C T16519C |
| NA19328 | A93G A95C T152C A189G T204C G207A T236C G247A A263G 514delC 515delA<br>A750G G769A T825A G1018A C1048T A1438G A2245G A2706G G2758A T2885C<br>C3516A C3594T A4104G C4312T T4586C A4769G G5147A G5231A T5442C<br>G5460A C5603T A5711G T6185C G6257A C7028T A7146G C7256T G7521A<br>8281delC 8282delC 8283delC 8284delC 8285delC 8286delC 8287delC 8288delT<br>8289delA C8428T A8460G C8468T A8566G C8655T A8701G A8860G C9042T<br>A9347G T9540C A9545G G9554A G9755A C9818T A10398G G10589A C10664T                                                                                                                                                                                                                                                                                                                   |

|         |                                                                                                                                                                                                                                                                                                                                                                                                                                                                                                                                                                                            |
|---------|--------------------------------------------------------------------------------------------------------------------------------------------------------------------------------------------------------------------------------------------------------------------------------------------------------------------------------------------------------------------------------------------------------------------------------------------------------------------------------------------------------------------------------------------------------------------------------------------|
|         | G10688A T10810C T10873C T10915C C11143T A11172G G11176A A11641G<br>G11719A G11914A G12007A C12705T A12720G G12775N A13105G C13116T<br>A13276G C13506T C13650T T14308C A14755G C14766T C15136T A15244G<br>A15326G G15431A C16148T T16172C C16187T C16188G T16189C C16223T<br>A16230G T16311C C16320T T16519C                                                                                                                                                                                                                                                                                |
| NA19331 | A73G A263G A750G A1438G A2706G C3450T A4188G A4769G G5773A T6221C<br>C7028T A8701G A8860G C9449T T9540C A10086G G10373A A10398G T10873C<br>A11002G G11719A A11800G C12705T T12903C A13105G C13914A C14766T<br>G15301A A15311G A15326G A15824G G15883A 15942delT T16093C T16124C<br>C16223T C16278T T16362C T16519C                                                                                                                                                                                                                                                                         |
| NA19332 | A73G G247A A263G G709A A750G G769A T825A G1018A A1438G T1717C<br>G1719A T1819C T2080C C2484T A2706G T3423C A3564G C3594T G3918A<br>G4092A A4104G G4655A C4676T A4769G T4967C A6527G C7028T C7256T<br>G7521A A7765G G7789A C8655T A8701G A8860G T9018C T9540C T9653C<br>T10101C C10178T A10398G G10688A T10810C T10873C C11266T T11287C<br>G11711A G11719A T11809C C12432T T12441C A12507G C12705T G12940A<br>A13050G C13383T C13506T T13602C C13650T T14326C G14560A C14766T<br>A15236G A15326G C15418T G16129A C16148T A16166G C16187T A16212G<br>C16223T A16254G C16278T T16368C C16527T |
| NA19334 | A73G A263G A750G A1438G A2706G C3450T A4769G G5773A T6221C C7028T<br>A8701G A8860G C9449T T9540C A10086G G10373A A10398G T10873C<br>A11002G G11719A A11800G C12705T T12903C A13105G C13914A C14766T<br>G15301A A15311G A15326G A15824G G15883A 15942delT T16093C T16124C<br>C16223T C16278T T16362C T16519C                                                                                                                                                                                                                                                                                |
| NA19338 | A73G T152N A263G A750G A1438G A2706G C3450T A4769G G5773A T6221C<br>C7028T A8701G A8860G C9449T T9540C A10086G G10373A A10398G T10873C<br>A11002G G11719A A11800G C12705T A13105G C13914A C14766T G15301A<br>A15311G A15326G A15824G G15883A 15942delT T16124C C16223T C16278T<br>T16362C G16390N T16519C                                                                                                                                                                                                                                                                                  |
| NA19346 | A73G A263G A750G A1438G A2706G C3450T A4769G G5773A T6221C C7028T<br>A8701G A8860G C9449T T9540C A10086G G10373A A10398G T10873C<br>A11002G G11719A A11800G C12705T A13105G C13914A C14766T G15301A<br>A15311G A15326G A15824G G15883A 15942delT T16093C T16124C C16223T<br>C16278T T16362C T16519C                                                                                                                                                                                                                                                                                        |
| NA19347 | A73G A263G A750G A1438G A2706G C3450T A4769G G5773A T6221C C7028T<br>A8701G A8860G C9449T T9540C A10086G G10373A A10398G T10873C<br>A11002G G11719A A11800G C12705T A13105G C13914A C14766T G15301A<br>A15311G A15326G A15824G G15883A 15942delT T16093C T16124C C16223T<br>C16278T T16362C T16519C                                                                                                                                                                                                                                                                                        |
| NA19350 | C64T A93G T152C G185A A189G A200G T236C G247A A263G A750G G769A<br>T825A 955insC G1018A C1048T A1053T A1438G A2245G A2706G G2758A<br>T2885C C3516A C3594T T3866C A4104G C4312T T4586C A4769G T5096C<br>G5231A T5442C G5460A C5603T T6185C C7028T A7146G C7256T G7521A<br>A8302G C8428T C8468T A8566G C8655T A8701G A8860G G8896A C9042T                                                                                                                                                                                                                                                    |

|         |                                                                                                                                                                                                                                                                                                                                                                                                     |
|---------|-----------------------------------------------------------------------------------------------------------------------------------------------------------------------------------------------------------------------------------------------------------------------------------------------------------------------------------------------------------------------------------------------------|
|         | A9347G T9540C G9755A C9818T A10398G G10589A C10664T G10688A T10810C T10873C T10915C G11176A A11641G G11719A G11914A G12007A C12705T A12720G A13105G A13276G C13506T C13650T T14308C C14766T C15136T A15326G G15431A T15850C G16129A C16148T C16168T T16172C C16187T C16188G T16189C C16223T A16230G T16311C C16320T                                                                                 |
| NA19351 | A73G T146C T152C T195C A263G A750G G769A G1018A A1438G T2416C A2706G C2789T C3594T G3918A A4104G A4769G A5285G C7028T T7175C C7256T C7274T G7521A A7771G G8206A A8701G A8860G A9221G T9540C T10115C A10398G T10873C G11719A G11914A T11944C A12693G C12705T G13590A C13650T A13803G A14566G C14766T A15244G G15301A A15326G T15629C T15784C C16223T C16278T C16286T C16294T A16309G G16390A T16519C |
| NA19352 | A73G A263G A750G A1438G A2706G C3450T A4769G G5773A T6221C C7028T A8701G A8860G C9449T T9540C A10086G G10373A A10398G T10873C A11002G G11719A A11800G C12705T A13105G C13914A C14766T G15301A A15311G A15326G A15824G G15883A 15942delT T16093C T16124C C16223T C16278T T16362C T16519C                                                                                                             |
| NA19355 | A73G A263G 514delC 515delA A750G A1438G A2706G C3450T A4769G G5773A T6221C C7028T A8701G A8860G C9449T T9540C A10086G G10373A A10398G T10873C A11002G G11719A A11800G C12705T A13105G C13914A C14766T G15301A A15311G A15326G A15824G G15883A 15942delT T16124C C16223T C16278T T16362C T16519C                                                                                                     |
| NA19359 | A73G T146C A189G A244G A263G C456T G513A A750G G769A T832N G1018A T1413C A1438G T1694C A2706G C3546T G3918A A4769G G4820A A4949G A5558G A5894G G6260A C7028T T8104C A8701G A8860G T9540C A9855G A10398G A10783C T10873C G11719A A12234G T12609C C12705T T13224C A13470G C14766T G15301A A15326G A15924G C16223T T16249C C16278T A16293T C16294T T16311C C16355T T16362C A16399G T16519C             |
| NA19360 | A73G A263G 514delC 515delA A750G A1438G A2706G C3450T A4769G G5773A T6221C C7028T A8701G A8860G C9449T T9540C A10086G G10373A A10398G T10873C A11002G G11719A A11800G C12705T T12903C A13105G C13914A T14540C C14766T G15301A A15311G A15326G A15824G G15883A 15942delT T16093C T16124C C16223T C16278T T16362C T16519C                                                                             |
| NA19371 | A73G C150T T152C A189G T195C A200G G207A A263G A750G A1438G T2352C A2706G A4769G T5774A T6221C C6587T C7028T A8701G A8860G A9254G T9540C A10398G A10819G T10873C C11024T G11719A C12705T A14152G T14212C G14569A C14766T G15301A A15326G T15670C T15942C C16185T T16209C C16223T C16327T                                                                                                            |
| NA19372 | A73G A263G 310insC 514delC 515delA A750G A1438G A2706G G2831A C3450T A4769G G5773A T6221C C7028T A8701G A8860G C9449T T9540C A10086G G10373A A10398G T10873C A11002G G11719A A11800G C12705T A13105G C13914A C14766T G15301A A15311G A15326G T15813C A15824G G15883A 15942delT T16124C C16223T C16278T T16362C T16519C                                                                              |
| NA19373 | A73G T195C 247delG A263G 455insC C535T A750G G769A T825A G1018A                                                                                                                                                                                                                                                                                                                                     |

|         |                                                                                                                                                                                                                                                                                                                                                                                                                                                                                                                                                                                                                                                          |
|---------|----------------------------------------------------------------------------------------------------------------------------------------------------------------------------------------------------------------------------------------------------------------------------------------------------------------------------------------------------------------------------------------------------------------------------------------------------------------------------------------------------------------------------------------------------------------------------------------------------------------------------------------------------------|
|         | A1438G C2417G A2706G T3027C T3423C C3594T A3720G A4104G A4769G A4976G G5147A C5213T C7028T C7256T G7521A A7972G C8655T A8701G A8860G G9025A T9540C A9809C A10398G T10493C G10688A T10810C T10873C T11701C G11719A C11840T T12188C C12432T A12546T C12705T T12714C A12810G A12950G C13506T T13569C C13650T T13830C C14766T G15148A A15326G G15927A C16111T G16129A C16148T A16166G C16187T T16189C C16223T A16233G A16254G C16278T C16360T                                                                                                                                                                                                                |
| NA19374 | A73G T195C 247delG A263G 455insC C535T A750G G769A T825A G1018A A1438G C2417G A2706G T3027C T3423C C3594T A3720G A4104G A4769G A4976G G5147A C5213T C7028T C7256T G7521A A7972G C8655T A8701G A8860G G9025A T9540C A9809C A10398G T10493C G10688A T10810C T10873C T11701C G11719A C11840T T12188C C12432T A12546T C12705T T12714C A12810G A12950G C13506T T13569C C13650T T13830C C14766T G15148A A15326G G15927A C16111T G16129A C16148T A16166G C16187T T16189C C16223T A16233G A16254G C16278T C16360T                                                                                                                                                |
| NA19375 | A73G T152C A263G 310insC 514delC 515delA A750G A1438G G1894A A2706G C3450T A4769G G5773A T6221C C7028T A8701G A8860G C9449T T9540C A10086G G10373A A10398G T10873C A11002G G11719A A11800G C12705T A13105G C13914A C14766T G15301A A15311G A15326G A15824G G15883A 15942delT T16093C T16124C C16223T C16278T T16362C T16519C                                                                                                                                                                                                                                                                                                                             |
| NA19376 | A73G T152C C182T A263G 310insC G513A 514delC 515delA T593A A750G G769A G1018A A1438G T2416C A2706G C2780T C2789T C3594T G3834A A4104G T4703C A4769G T6731N A6752G C7028T T7175C C7256T C7274T G7521A A7771G G8206A A8701G A8860G A9221G G9438A T9540C T10115C A10398G T10873C G11016A G11719A G11914A T11944C A12612G C12705T C13125T G13590A C13650T A13803G A14566G C14766T G15301A T15718C A15799G A16182C 16183delA T16189C C16223T T16229C C16264T C16278T C16294T T16311C G16390A T16519C                                                                                                                                                          |
| NA19377 | A73G T146C A263G 310insC A750G A1438G G1719A A2706G A4388G T4688C T4742C A4769G C5300T T5492C C7028T T7861C A8701G C8781A A8860G C8943T A9327G T9509C T9540C G9554A G9575A A10398G G10586A T10873C A11590G G11719A T12175C G12236A T12519C C12705T A14587G C14766T C14862T G15119A G15301A A15326G C15646T T16172C C16192T C16223T T16311C A16399G                                                                                                                                                                                                                                                                                                       |
| NA19378 | A73G C151T T152C C182T C186A A189C T195C C198T G247A A263G A297G G316A A750G G769A T825A G1018A A1438G A2220G 2395delA A2706G T2885C C3594T G3666A A4104G A4769G T5580C 5894insC A5951G T6071C A6125G G6150A C6209T T6253C C7010T C7028T A7055G A7076G A7146G C7256T G7337A T7389C G7521A G8027A C8468T C8655T A8701G A8784G A8860G T8877C A9072G T9540C T10031C T10321C A10398G G10586A G10688A A10792G C10793T T10810C T10873C A11164G A11654G G11719A C12049T C12705T A12810G A13105G A13149G A13485G C13650T T13789C T14000A A14071G T14178C G14560A C14766T C14911T A15326G T15514C G16129A C16187N T16189C C16223T C16260T A16265C C16278T C16286A |

|         |                                                                                                                                                                                                                                                                                                                                                                                                                                                                                                                                                                                                                                                                                            |
|---------|--------------------------------------------------------------------------------------------------------------------------------------------------------------------------------------------------------------------------------------------------------------------------------------------------------------------------------------------------------------------------------------------------------------------------------------------------------------------------------------------------------------------------------------------------------------------------------------------------------------------------------------------------------------------------------------------|
|         | C16294T T16311C C16320T C16360T T16519C C16527T                                                                                                                                                                                                                                                                                                                                                                                                                                                                                                                                                                                                                                            |
| NA19379 | C64T A93G T152C G185A A189G A200G T236C G247A A263G 514delC 515delA A750G G769A T825A 955insC G1018A C1048T A1053T A1438G A2245G A2706G G2758A T2885C C3516A C3594T T3866C A4104G C4312T T4586C A4769G T5096C G5231A T5442C G5460A C5603T T6185C C7028T A7146G C7256T G7521A A8302G C8428T C8468T A8566G C8655T A8701G A8860G G8896A C9042T A9347G T9540C G9755A C9818T A10398G G10589A C10664T G10688A T10810C T10873C T10915C G11176A A11641G G11719A G11914A G12007A C12705T A12720G A13105G G13135A A13276G C13506T C13650T T14308C C14766T C15136T A15326G G15431A G16129A C16148T C16168T T16172C C16187T C16188G T16189C C16223T A16230G T16311C C16320T                            |
| NA19380 | A73G A263G 310insC 514delC 515delA A750G A1438G A2706G C3450T A4769G G5773A T6221C C7028T A8701G A8860G C9449T T9540C A10086G G10373A A10398G T10873C A11002G G11719A A11800G C12705T A13105G C13914A C14766T G15301A A15311G A15326G A15824G G15883A 15942delT T16093C T16124C C16223T C16278T T16362C T16519C                                                                                                                                                                                                                                                                                                                                                                            |
| NA19381 | A73G G143A T146C T152C T195C A263G A750G G769A G1018A A1438G T2416C A2706G T2746C C2789T C3594T A4104G A4769G C7028T T7175C C7256T C7274T G7521A A7771G G8206A A8701G A8860G A9221G T9540C T10115C A10337G A10398G T10873C G11719A G11914A T11944C A12693G C12705T G13590A C13650T A13803G A13917G A14566G C14766T G15301A A15326G T15784C T16189C C16223T C16245T C16278T C16294T G16390A T16519C                                                                                                                                                                                                                                                                                         |
| NA19382 | A93G A95C G185A A189G T236C G247A A263G 310insC 514delC 515delA A750G G769A T825A T961C G1018A C1048T A1438G A2245G A2706G G2758A T2885C C3516A C3594T A4104G G4113A C4312T T4586C A4769G T5096C G5231A T5442C G5460A C5603T C5911T T6185C C7028T A7146G C7256T G7521A A8191G C8428T C8468T A8566G C8655T A8701G A8860G C9042T A9347G T9540C G9755A C9818T A10398G G10589A C10664T G10688A T10810C T10873C T10915C T11017C G11176A A11641G G11719A G11914A G12007A G12127A C12705T A12720G A13105G A13276G C13506T C13650T A14007G T14308C C14766T C15136T A15326G C15381T G15431A G16129A C16148T C16168T T16172C C16187T C16188G T16189C C16223T A16230G C16278T A16293G T16311C C16320T |
| NA19383 | A73G C150T T204C A263G 310insC A750G G769A G1018A A1438G A1914G A2706G C4137T A4769G T4977C G5460A C7028T T7389C C7849T G8392A A8701G A8860G T8928C C9168T T9540C A10398G C10813T T10873C G11719A C12705T C12988T C14766T T14778C A14793G T14971C G15301A A15326G C16223T T16311C T16362C                                                                                                                                                                                                                                                                                                                                                                                                  |
| NA19384 | A73G A189C A263G 310insC 517delA 518delC A750G A1438G G1719A C2389T A2706G G2831A T3777C A4388G A4769G C5300T C7028T A7055G T7861C T8176C A8701G A8767G A8860G T9509C T9540C G9575A A10044G A10398G T10873C A11590G G11719A G11963A A12507G C12705T G14410A C14766T G15301A A15326G C16179T C16192T A16215G C16223T C16256A A16284G                                                                                                                                                                                                                                                                                                                                                        |



|         |                                                                                                                                                                                                                                                                                                                                                                                                                                                                                                                                                                                                                                                                                                                               |
|---------|-------------------------------------------------------------------------------------------------------------------------------------------------------------------------------------------------------------------------------------------------------------------------------------------------------------------------------------------------------------------------------------------------------------------------------------------------------------------------------------------------------------------------------------------------------------------------------------------------------------------------------------------------------------------------------------------------------------------------------|
|         | T16311C                                                                                                                                                                                                                                                                                                                                                                                                                                                                                                                                                                                                                                                                                                                       |
| NA19385 | A73G C151T T152C C182T C186A A189C T195C C198T G247A A263G A297G<br>310insC G316A 514delC 515delA A523G A750G G769A T825A G1018A A1438G<br>A2363G 2395delA A2706G G2758A T2885C C3594T G3666A A3796T A3843G<br>C3900T A4104G A4769G G5460A G5821A A5951G T6071C C7028T A7055G<br>A7146G C7256T T7389C G7521A G7805A G8027A C8468T C8655T A8701G<br>A8860G T8937C A9072G T9540C T10321C A10398G G10586A G10688A<br>T10810C T10873C G11719A T11899C G11914A C12103T C12705T A12810G<br>A13105G A13485G C13506T C13650T T13789C T14000A A14148G T14178C<br>T14319C G14560A C14766T C14911T G15301A A15326G C15626T A16038G<br>T16093C G16129A C16187T T16189C C16223T T16271C C16278T A16293G<br>C16294T T16311C C16360T T16519C |
| NA19390 | A73G C151T T152C C182T C186A A189C G247A A263G 310insC G316A 514delC<br>515delA T629C A750G G769A T825A G1018A A1438G C2283T 2395delA A2706G<br>G2758A T2885C C3210T A3434G C3594T G3666A A4104G T4755C A4769G<br>A5951G T6071C T6221A G6917A C7028T A7146G C7256T T7389C G7521A<br>G8027A G8251A C8417T C8468T C8655T A8701G A8860G A9072G T9540C<br>T10265C A10398G G10586A G10688A T10810C T10873C C11302T A11317G<br>G11719A A12400G C12542T C12705T A12810G A13105G A13485G C13506T<br>C13650T G13708A T13789C C13981T T14000A T14178C G14560A C14766T<br>C14794T C14911T A15226G A15326G T15905C C15978T T16017C G16129A<br>A16163G C16187T T16189C T16209C C16223T C16278T A16293G C16294T<br>T16311C C16360T T16519C  |
| NA19391 | A73G C150T A189G A200G A263G 310insC A750G A1438G T2352C A2706G<br>A4769G T6221C C6587T C7028T A8701G A8860G G8865A T9540C T10370C<br>A10376G A10398G A10819G T10873C G11719A G11887A C12705T A14152G<br>T14212C C14766T G15301A A15326G C15547T T15670C A15909G T15942C<br>C16223T C16327T                                                                                                                                                                                                                                                                                                                                                                                                                                   |
| NA19392 | A73G C150T T152C C182T T195C C198T T204C A263G C418T 514delC 515delA<br>A750G G769A G1018A A1438G G1442A C1706T C2332T A2358G T2416C<br>A2706G C3594T A4104G A4158G T4370C G4580N A4767G A4769G C5027T<br>C5331A T5814C G6026A C6713T C7028T C7256T G7521A T7624A C8080T<br>G8206A G8387A A8701G G8856A A8860G A9221G T9540C T10115C A10398G<br>T10828C T10873C G11719A T11944C G12236A C12705T A12948G G13590A<br>C13650T C13924T A14059G C14766T G15110A G15217A G15301A A15326G<br>C16114A G16129A G16213A C16223T C16278T T16362C G16390A                                                                                                                                                                                 |
| NA19393 | A73G T152C C182T A263G G513A 514delC 515delA T593A A750G G769A<br>G1018A A1438G T2352C T2416C A2706G C2780T C2789T C3594T G3834A<br>A4104G T4703C A4769G T6227C A6752G C7028T T7175C C7256T C7274T<br>G7521A G7702A A7771G G8206A A8701G A8860G A9221G G9438A T9540C<br>T10115C A10398G T10873C G11719A G11914A T11944C A12612G C12705T<br>C13125T G13590A C13650T A13651G A13803G A14566G C14766T G15301A<br>A15326G C16169T A16170G T16189C C16223T T16229C C16264T C16278T<br>C16294T T16311C G16390A T16519C                                                                                                                                                                                                              |

|         |                                                                                                                                                                                                                                                                                                                                                                                                                    |
|---------|--------------------------------------------------------------------------------------------------------------------------------------------------------------------------------------------------------------------------------------------------------------------------------------------------------------------------------------------------------------------------------------------------------------------|
| NA19394 | A73G G143A T146C T152C T195C A263G 310insC A750G G769A G1018A A1438G T2416C A2706G C2789T G2855A C3594T A4104G A4769G C7028T T7175C C7256T C7274T G7521A A7771G G8206A A8701G A8860G A9221G T9540C T10115C A10398G T10873C G11719A G11914A T11944C A12693G C12705T G13590A C13650T A13803G C14563A A14566G C14766T G15301A A15326G T15670C T15784C T16189C C16192T C16223T C16256T C16278T C16294T A16309G G16390A |
| NA19395 | A73G T146C T152C T195C A263G A750G G769A G1018A A1438G T2416C A2706G C2789T C3594T A4104G A4769G G5417A A5581G A6131G C7028T T7175C C7256T C7274T G7521A A7771G G8206A A8701G A8860G A9221G T9540C T10115C A10398G T10873C A11167G G11719A G11914A T11944C A12693G C12705T G13590A C13650T A13803G A14566G C14766T G15301A A15326G T15784C T16189C C16192T C16223T C16278T C16294T A16309G G16390A T16519C         |
| NA19396 | A73G A263G 310insC 514delC 515delA A750G A1438G A2706G C3450T A4769G G5773A T6221C C7028T A8701G A8860G C9449T T9540C A10086G G10373A A10398G T10873C A11002G G11719A A11800G C12705T A13105G C13914A C14766T G15301A A15311G A15326G A15824G G15883A 15942delT T16093C C16111G T16124C C16223T C16278T T16362C T16519C                                                                                            |
| NA19397 | A73G A263G 310insC 514delC 515delA A750G A1438G A2706G C3450T A4769G G5773A T6221C C7028T A8701G A8860G C9449T T9540C A10086G G10373A A10398G T10873C A11002G G11719A A11800G C12705T A13105G C13914A C14766T G15301A A15311G A15326G A15824G G15883A 15942delT T16093C T16124C C16223T C16278T T16362C T16519C                                                                                                    |
| NA19398 | A73G G185A A189G A263G 514delC 515delA A750G A1438G A2706G T3396C A3927G T4218C A4769G G5821A G6182A C7028T C8676T A8701G A8860G C9365T T9540C C9731A A10398G T10873C G11719A A12280G A12534G C12705T A13105G C14766T G15301A G15314A A15326G T15479C T15514C 15942delT T16209C C16223T C16234T A16235G T16311C T16519C                                                                                            |
| NA19399 | A73G C150T A189G A200G A263G 310insC A750G A1438G T2352C A2706G A4769G T6221C C6587T C7028T A8701G A8860G G8865A T9540C A9644G T10370C A10376G A10398G A10819G T10873C G11719A G11887A C12705T A14152G T14212C C14766T G15301A A15326G C15547T T15670C A15909G T15942C C16223T C16327T                                                                                                                             |
| NA19401 | A73G C150T T204C G207A A263G 514delC 515delA A750G T1413C A1438G A2706G G3483A A4769G G5460A 5894insC A6401G C7028T T8311C A8701G A8817G A8860G T9540C A10398G A10819G T10873C G11719A C12705T T13392C G13708A C14766T G15172A G15301A A15326G C16169T C16223T C16278T T16519C                                                                                                                                     |
| NA19402 | C64T A93G T152C A189G T204C G207A T236C G247A A263G 514delC 515delA A750G G769A T825A G1018A C1048T A1438G A2245G A2706G G2758A T2885C C3516A C3594T A4104G C4312T T4586C A4769G G5147A G5231A T5442C G5460A C5603T A5711G T6185C G6257A C7028T A7146G C7256T G7521A 8281delC 8282delC 8283delC 8284delC 8285delC 8286delT 8287delC 8288delT                                                                       |

|         |                                                                                                                                                                                                                                                                                                                                                                                                                                                                                                                                                                                                                                           |
|---------|-------------------------------------------------------------------------------------------------------------------------------------------------------------------------------------------------------------------------------------------------------------------------------------------------------------------------------------------------------------------------------------------------------------------------------------------------------------------------------------------------------------------------------------------------------------------------------------------------------------------------------------------|
|         | 8289delA C8428T A8460G C8468T A8566G C8655T A8701G A8860G C9042T A9347G T9540C A9545G G9554A G9755A C9818T A10398G G10589A C10664T G10688A T10810C T10873C T10915C C11143T A11172G G11176A A11641G G11719A G11914A G12007A C12705T A12720G A13105G C13116T A13276G C13506T C13650T T14308C A14755G C14766T C15136T A15326G G15431A C16148T T16172C C16187N C16188N T16189C C16223T A16230G T16311C C16320T T16519C                                                                                                                                                                                                                        |
| NA19403 | A73G G143A T146C T152C A189G T195C T199C A263G 310insC A750G G769A G1018A A1438G T2416C A2706G C2789T C3594T A4104G A4769G G4920N C6713T C7028T T7175C C7256T C7274T G7521A A7771G G8206A A8701G A8860G A9221G T9540C T10115C A10398G T10873C G11719A G11914A T11944C G11963A A12693G C12705T G13590A A13803G A14566G C14766T A15258G G15301A A15326G T15784C G16145A A16183C T16189C T16224C C16278T C16294T G16390A                                                                                                                                                                                                                     |
| NA19404 | A73G C182T T195C 247delG A263G 455insC C535T A750G G769A T825A G1018A A1438G C2417G A2706G T3027C T3423C C3594T A3720G A4104G A4769G A4976G C5213T G6446A T6965C G7013A C7028T C7256T G7521A A7972G C8655T C8658T A8701G A8860G C9003T T9540C G9554A A9809C G10172A A10398G T10493C G10688A T10810C T10873C T11701C G11719A T12188C C12432T A12546T C12705T T12714C A12810G T12879C A12950G C13506T T13569C C13650T T13830C A14260G T14581C C14766T A15326G G15930T C16111T G16129A C16148T A16166G C16176T C16187T T16189C C16223T A16254G C16278T C16291T                                                                               |
| NA19428 | A73G A263G 514delC 515delA A750G A1438G A2706G C3450T A4769G G5773A T6221C C7028T A8701G A8860G C9449T T9540C A10086G G10373A A10398G T10873C A11002G G11719A A11800G C12705T A13105G C13914A A14280G C14766T G15301A A15311G A15326G A15824G G15883A 15942delT T16093C T16124C C16223T C16278T T16362C T16519C                                                                                                                                                                                                                                                                                                                           |
| NA19429 | A73G A263G 514delC 515delA A750G A1438G A2706G C3450T A4769G G5773A T6221C C7028T A8701G A8860G C9449T T9540C A10086G G10373A A10398G T10873C A11002G G11719A A11800G C12705T A13105G C13914A C14766T G15301A A15311G A15326G A15824G G15883A 15942delT T16124C C16223T C16278T T16362C T16519C                                                                                                                                                                                                                                                                                                                                           |
| NA19430 | C64T A93G G185A A189G A200G T236C G247A A263G A750G G769A T825A G1018A C1048T A1438G A2245C A2706G G2758A T2885C C3116T C3516A C3594T T3866C A4104G C4312T T4586C A4769G T5096C G5231A T5442C G5460A C5603T T6185C C7028T A7146G C7256T G7521A C8428T C8468T A8566G C8655T A8701G A8860G C9042T A9218G A9347G T9540C G9575N G9755A C9818T A10398G G10589A C10664T G10688A T10810C T10873C T10915C G11176A A11641G G11719A G11914A G12007A C12705T A12720G T12732C A13105G A13276G C13506T C13650T C14194T T14308C C14766T C15136T A15326G G15431A G16129A C16148T C16168T T16172C C16187T C16188G T16189C C16223T A16230G T16311C C16320T |
| NA19431 | A73G T152C C182T G185T G247A A263G A357G G709A T710C A750G G769A                                                                                                                                                                                                                                                                                                                                                                                                                                                                                                                                                                          |

|         |                                                                                                                                                                                                                                                                                                                                                                                                                                                                                                                  |
|---------|------------------------------------------------------------------------------------------------------------------------------------------------------------------------------------------------------------------------------------------------------------------------------------------------------------------------------------------------------------------------------------------------------------------------------------------------------------------------------------------------------------------|
|         | T825A G1018A T1738C T2352C A2706G G2758A A2768G T2885C T3308C<br>C3594T G3666A G3693A A4104G A4769G A5036G G5046A T5393C C5499T<br>T5655C C6548T T6827C A6989G C7028T A7055G A7146G C7256T T7389C<br>G7521A C7867T A8248G C8468T C8655T A8701G A8860G T9540C A10398G<br>G10688A T10810C T10873C G11719A T12519C C12705T A13105G C13506T<br>C13650T T13789C C13848T C13880A T14178C A14203G G14560A C14766T<br>A14769G T15115C A15326G T16126C C16187T T16189C C16223T C16264T<br>C16270T C16278T T16311C T16519C |
| NA19432 | A73G T146C A244G A263G T391C A750G G769A G1018A T1413C A1438G<br>T1694C 2457delA A2706G C3435T G3918A A4021G A4769G A4949G G6260A<br>C7028T A7455N A8071C T8104C T8119C A8248G C8478T A8701G A8860G<br>T9540C A9855G A10398G A10532G A10783C T10873N G11719A T12609C<br>C12705T A13470G C14766T G15301A A15326G T15454C T16172C C16223T<br>A16293T T16311C C16355T T16362C A16399G T16519C                                                                                                                       |
| NA19434 | A73G T146C A244G A263G T391C A750G G769A G1018A T1413C A1438G<br>T1694C A2706G T2960N C3435T G3918A A4021G A4769G A4949G G6260A<br>C7028T A7455G A8071C T8104C T8119C A8248G C8478T A8701G A8860G<br>T9540C A9855G A10398G A10532G A10783C T10873C G11719A T12609C<br>C12705T A13470G C14766T G15301A A15326G T15454C T16172C C16223T<br>A16293T T16311C C16355T T16362C A16399G T16519C                                                                                                                         |
| NA19435 | A73G T146C A244G A263G T391C A750G G769A G1018A T1413C A1438G<br>T1694C A2706G G3918A A4021G A4769G A4949G G6260A C7028T A7455G<br>A8071C T8104C T8119C A8248G C8478T A8701G A8860G T9540C A9855G<br>A10398G A10532G A10783C T10873C G11719A T12609C C12705T A13470G<br>C14766T G15301A A15326G T15454C T16172C C16223T A16293T T16311C<br>C16355T T16362C A16399G T16519C                                                                                                                                       |
| NA19436 | A73G A263G A750G A1438G A2706G C3450T A4769G G5773A T6221C C7028T<br>A8701G A8860G C9449T T9540C G9966A A10086G G10373A A10398G T10873C<br>A11002G G11719A A11800G C12705T A13105G C13914A C14766T G15301A<br>A15311G A15326N A15824G G15883A 15942delT T16093C T16124C C16223T<br>C16278T T16362C T16519C                                                                                                                                                                                                       |
| NA19437 | A73G C150T T152C A257G A263G G709A A750G A1438G G1719A A2706G<br>A4769G C5027T A5823G C7028T T7645C T8167C A8701G A8860G T9540C<br>G9575A A10398G C10670T A10679G A10819G T10873C T11260C G11719A<br>G12127A C12705T G13590A C13800A C14766T G15301A A15326G G16153A<br>T16172C C16174T C16223T G16319A T16519C                                                                                                                                                                                                  |
| NA19438 | A73G C151T T152C G247A T310N 514delC 515delA C573T G709A A750G<br>A1438G A2706G G3834A A4769G C7028T A7364G A7472G A8344T A8701G<br>A8745G A8860G A9161G T9540C A10289G A10398G T10873C T11368C<br>G11719A C12705T C12816T C14766T G15301A A15326G C15754T C16223T<br>A16254G A16316G T16519C                                                                                                                                                                                                                    |
| NA19439 | A73G A263G A750G A1438G A2706G C3450T A4769G G5773A T6221C C7028T<br>A8701G A8860G C9449T T9540C A10086G G10373A A10398G T10873C<br>A11002G G11719A A11800G C12705T A13105G C13914A T14180C C14766T                                                                                                                                                                                                                                                                                                              |

|         |                                                                                                                                                                                                                                                                                                                                                                                                                                                                                                                                                                                                                                                                                                                  |
|---------|------------------------------------------------------------------------------------------------------------------------------------------------------------------------------------------------------------------------------------------------------------------------------------------------------------------------------------------------------------------------------------------------------------------------------------------------------------------------------------------------------------------------------------------------------------------------------------------------------------------------------------------------------------------------------------------------------------------|
|         | G15301A A15311G A15326G A15824G G15883A 15942delT T16093C T16124C<br>C16223T C16278T T16362C T16519C                                                                                                                                                                                                                                                                                                                                                                                                                                                                                                                                                                                                             |
| NA19440 | A93G T152C G185A A189G T236C G247A A263G T310N 514delC 515delA<br>A750G G769A T825A G1018A C1048T A1438G G1719A A2245G A2706G<br>G2758A T2885C C3516A C3594T A4104G C4312T T4586C A4769G A5073G<br>T5096C G5147A G5231A T5442C G5460A C5603T T6185C C7028T A7146G<br>C7256T G7521A C8428T C8468T A8566G C8655T A8701G A8860G C9042T<br>A9288G A9347G T9540C G9755A C9818T A10398G G10589A C10664T G10688A<br>T10810C T10873C T10915C G11176A A11641G G11719A G11914A G12007A<br>C12031A C12705T A12720G A13105G A13276G C13506T C13650T A14251G<br>T14308C G14569A C14766T C15136T A15326G G15431A C16114A G16129A<br>C16148T C16168T T16172C C16184T C16187T C16188G T16189C C16223T<br>A16230G A16293G T16311C |
| NA19443 | A73G T152C C182T A263G G709A A750G G769A G1018A A1438G T2416C<br>A2706G C2789T C3594T A4104G A4562G A4769G A5045G A6752G C7028T<br>T7175C C7256T C7274T G7521A A7771G G8206A A8701G A8860G A9221G<br>T9540C G9932A T10115C A10398G T10873C G11719A C11767T G11914A<br>T11944C C12705T A13434G G13579A G13590A C13650T A13803G A13827G<br>A14566G C14766T G15301A A15326G C15939T C16111T T16189C C16223T<br>T16229C C16278T C16291T C16294T T16311C G16390A T16519C                                                                                                                                                                                                                                              |
| NA19444 | A73G T146C A244G A263G T391C A750G G769A G1018A T1413C A1438G<br>T1694C A2706G C3435T G3918A A4021G A4769G A4949G G6260A C7028T<br>A7455G A8071C T8104C T8119C A8248G C8478T A8701G A8860G T9540C<br>A9855G A10398G A10532G A10783C T10873C G11719A T12609C C12705T<br>A13470G C14766T G15301A A15326G T15454C T16172C C16223T A16293T<br>T16311C C16355T T16362C A16399G T16519C                                                                                                                                                                                                                                                                                                                                |
| NA19445 | A73G T146C T152C A244G A263G T391C A750G G769A G1018A T1413C<br>A1438G T1694C A2706G G3918A A4769G A4949G G6260A C7028T T8104C<br>C8478T A8701G A8860G T9540C A9855G A10398G A10783C T10873C G11719A<br>T12609C C12705T A13470G C14766T G15301A A15326G T15454C T16172C<br>C16223T A16293T T16311C C16355T T16362C A16399G T16519C                                                                                                                                                                                                                                                                                                                                                                               |
| NA19446 | A73G C150T A189G T199C T204C A263G A750G A1438G A2706G G3483A<br>A4769G G5460A 5894insN A6401G G6962A C7028T T8311C A8701G A8817G<br>A8860G T9540C A10398G A10819G T10873C G11719A C12705T G13708A<br>C14766T G15172A G15301A A15326G C16169T C16223T C16278T T16519C                                                                                                                                                                                                                                                                                                                                                                                                                                            |
| NA19448 | A93G A95C G185A A189G T236C G247A A263G A750G G769A T825A T961C<br>G1018A C1048T C1290T A1438G A2245G A2706G G2758A T2885C C3516A<br>C3594T A4104G C4312T T4586C A4769G T5096C G5231A T5442C G5460A<br>C5603T C5911T T6185C C6492N C7028T A7146G C7256T G7521A A8191G<br>C8428T C8468T A8566G C8655T A8701G A8767G A8860G C9042T A9347G<br>T9540C G9755A C9818T A10398G G10589A C10664T G10688A T10810C<br>T10873C T10915C T11017C G11176A A11641G G11719A G11914A G12007A<br>G12127A C12705T A12720G A13105G A13276G C13506T C13650T A14007G<br>T14308C C14766T C15136T A15326G C15381T G15431A G16129A C16148T                                                                                                 |

|         |                                                                                                                                                                                                                                                                                                                                                                                                                                                                                                                                                                                                                                                                                                                                                                                                                      |
|---------|----------------------------------------------------------------------------------------------------------------------------------------------------------------------------------------------------------------------------------------------------------------------------------------------------------------------------------------------------------------------------------------------------------------------------------------------------------------------------------------------------------------------------------------------------------------------------------------------------------------------------------------------------------------------------------------------------------------------------------------------------------------------------------------------------------------------|
|         | C16168T T16172C C16187T C16188G T16189C C16223T A16230G C16278T A16293G T16311C C16320T                                                                                                                                                                                                                                                                                                                                                                                                                                                                                                                                                                                                                                                                                                                              |
| NA19449 | A93G A95C G185A A189G T236C G247A A263G A750G G769A T825A T961C G1018A C1048T A1438G A2245G A2706G G2758A T2885C C3516A C3594T A4104G C4312T T4586C A4769G T5096C G5231A T5442C G5460A C5603T C5911T T6185C C7028T A7146G C7256T G7521A A8191G C8428T C8468T A8566G C8655T A8701G A8860G C9042T A9347G T9540C G9755A C9818T A10398G G10589A C10664T G10688A T10810C T10873C T10915C T11017C G11176A A11641G G11719A G11914A G12007A G12127A C12705T A12720G A13105G A13276G C13506T C13650T A14007G T14308C C14766T C15136T A15326G C15381T G15431A G16129A C16148T C16168T T16172C C16187T C16188G T16189C C16223T A16230G C16278T A16293G T16311C C16320T T16519C                                                                                                                                                  |
| NA19451 | A73G A263G 514delC 515delA A750G A1438G A2706G C3450T A4769G G5773A T6221C C7028T A8701G A8860G C9449T T9540C A10086G G10373A A10398G T10873C A11002G G11719A A11800G C12705T A13105G C13914A C14766T G15301A A15311G A15326G A15824G G15883A 15942delT T16093C T16124C C16223T C16278T T16362C T16519C                                                                                                                                                                                                                                                                                                                                                                                                                                                                                                              |
| NA19452 | A73G T146C T152C T195C A263G A750G G769A G1018A A1438G T2416C A2706G C2789T C3594T A4104G A4769G A5285G C7028T T7175C C7256T C7274T G7521A A7771G G8206A A8701G A8860G A9221G T9540C T10115C A10398G T10873C G11719A G11914A T11944C A12693G C12705T G13590A C13650T A13803G A14566G C14766T A15244G G15301A A15326G T15629C T15784C C16223T C16278T C16286T C16294T A16309G G16390A T16519C                                                                                                                                                                                                                                                                                                                                                                                                                         |
| NA19453 | A73G T146C T152C A244G A263G T391C A750G G769A G1018A T1413C A1438G T1694C A2706G G3918A A4769G A4949G G6260A C7028T T8104C C8478T A8701G A8860G T9540C A9855G A10398G A10783C T10873C G11719A T12609C C12705T A13470G C14766T G15301A A15326G T15454C T16172C C16223T A16293T T16311C C16355T T16362C A16399G T16519C                                                                                                                                                                                                                                                                                                                                                                                                                                                                                               |
| NA19454 | A93G A95C C151T T152C T173C G185A A189G G247A A263G 514delC 515delA A750G G769A T825A G1018A C1048T A1438G A2245G A2706G G2758A T2885C C3516A C3594T A4104G C4312T A4562G T4586C T4695C T4703C A4769G C4926A C4964T A5276G T5442C C5603T A5951G T6185C A6923G C7007T C7028T A7146G T7148C C7256T A7364G G7521A T8200C 8281delC 8282delC 8283delC 8284delC 8285delC 8286delT 8287delC 8288delT 8289delA C8468T C8655T A8701G A8860G C9042T A9347G T9540C T9581C C9620T C9818T A10398G G10589A G10688A T10810C T10873C T10915C A11641G G11719A G11914A G12007A C12118T C12705T A12720G T12903C A13105G A13276G A13470G C13506T C13650T C14109N C14620T C14766T C15136T A15326G G15431A T15852C C16169T T16172C T16178C C16187N T16189C C16223T A16230G A16265G C16278T A16293G T16311C G16319A C16327T C16354T T16368C |
| NA19455 | A73G T195C A200G G247A A263G 514delC 515delA A750G G769A T825A G1018A A1438G T1717C G1719A T2080C C2484T A2706G T3423C A3564G                                                                                                                                                                                                                                                                                                                                                                                                                                                                                                                                                                                                                                                                                        |

|         |                                                                                                                                                                                                                                                                                                                                                                                                                                                                                                                                                                                                                |
|---------|----------------------------------------------------------------------------------------------------------------------------------------------------------------------------------------------------------------------------------------------------------------------------------------------------------------------------------------------------------------------------------------------------------------------------------------------------------------------------------------------------------------------------------------------------------------------------------------------------------------|
|         | C3594T G3918A G4092A A4104G G4655A C4676T A4769G T4967C A6527G C7028T A7076G C7256T G7521A A7765G G7789A C8655T A8701G A8860G T9018C T9540C T9653C T10101C A10398G G10688A T10810C T10873C C11266T T11287C G11719A T11809C C12432T A12507G C12705T G12940A A13050G C13383T C13506T T13602C C13650T C14766T A15236G A15326G C15418T G16129A A16166G C16187T C16223T A16254G C16278T C16291T T16368C C16527T                                                                                                                                                                                                     |
| NA19456 | A73G A263G 514delC 515delA A750G A1438G A2706G C3450T A4769G G5773A T6221C C7028T A8701G A8860G C9449T T9540C A10086G G10373A A10398G T10873C A11002G G11719A A11800G C12705T A13105G C13914A C14766T G15301A A15311G A15326G A15824G G15883A 15942delT T16093C T16124C C16223T C16278T T16362C T16519C                                                                                                                                                                                                                                                                                                        |
| NA19457 | A73G C518T G709A A750G A1438G G1719A A2706G C3588T A4388G A4769G C5300T T5492C C7028T T7372C T7861C T8047C C8394N G8485A A8701G A8860G T9428C T9509C T9540C G9575A A10358G A10398G T10873C A11590G G11719A C12432T C12705T G13708A T13926C T14110C T14494C C14664T C14766T G15301A A15326G C16192T T16195C C16245T T16298C T16311C G16390A T16519C                                                                                                                                                                                                                                                             |
| NA19461 | A73G T195C A200G G247A A263G 573insC A750G G769A T825A G1018A A1438G T1717C G1719A T2080C C2484T A2706G T3423C A3564G C3594T G3918A G4092A A4104G G4655A C4676T A4769G T4967C A6527G C7028T A7076G C7256T G7521A A7765G G7789A C8655T A8701G A8860G T9018C T9540C T9653C T10101C A10398G G10688A T10810C T10873C C11266T T11287C G11719A T11809C C12432T A12507G C12705T G12940A A13050G C13383T C13506T T13602C C13650T C14766T A15236G A15326G C15418T G16129A A16166G C16187T C16223T A16254G C16278T C16291T T16368C C16527T                                                                               |
| NA19462 | A73G T152C C182T G185T A189G T195C T199C G247A A263G A357G 514delC 515delA G709A T710C A750G G769A T825A G1018A T1738C T2352C A2706G G2758A A2768G T2885C T3308C C3594T G3666A G3693A A4104G A4769G A5036G G5046A T5393C T5655C C6548T T6827C A6989G C7028T A7055G A7146G C7256T T7389C A7403G G7521A C7867T A8248G C8468T C8655T A8701G A8860G T9540C A10398G G10688A T10810C T10873C G11719A T12519C C12705T A13105G C13506T C13650T T13789C C13880A T14178C A14203G G14560A C14766T A14769G G15077A C15103T T15115C A15326G T16126C C16187T T16189C C16223T C16264T C16270T C16278T A16293G T16311C T16519C |
| NA19463 | A73G T146C A244G A263G T742C A750G G769A G1018A T1413C A1438G T1694C A2706G G3918A A4769G A4949G G6260A T6956C C7028T G7976A T8104C G8485A A8701G A8860G T9540C A9855G A10398G A10783C T10873C A11608G G11719A T12396C T12609C G12630A C12705T A13470G G13759A C14766T G15301A A15326G G15355A A15712G T15970C T16172C C16223T A16293T T16311C C16355T A16399G                                                                                                                                                                                                                                                 |
| NA19466 | A93G A95C G185A A189G T236C G247A A263G 514delC 515delA A750G G769A                                                                                                                                                                                                                                                                                                                                                                                                                                                                                                                                            |

|         |                                                                                                                                                                                                                                                                                                                                                                                                                                                                                                                                                                                                                                                                                                |
|---------|------------------------------------------------------------------------------------------------------------------------------------------------------------------------------------------------------------------------------------------------------------------------------------------------------------------------------------------------------------------------------------------------------------------------------------------------------------------------------------------------------------------------------------------------------------------------------------------------------------------------------------------------------------------------------------------------|
|         | T825A T961C G1018A C1048T A1438G A2245G A2706G G2758A T2885C<br>C3516A C3594T A4104G C4312T T4586C A4769G T5096C G5231A T5442C<br>G5460A C5603T C5911T T6185C C7028T A7146G C7256T G7521A A8191G<br>C8428T C8468T A8566G C8655T A8701G A8860G C9042T A9347G T9540C<br>G9755A C9818T A10398G G10589A C10664T G10688A T10810C T10873C<br>T10915C T11017C G11176A A11641G G11719A G11914A G12007A G12127A<br>C12705T A12720G A13105G A13276G C13506T C13650T A14007G T14308C<br>C14766T C15136T A15326G C15381T G15431A G16129A C16148T C16168T<br>T16172C C16187T C16188G T16189C C16223T A16230G C16278T A16293G<br>T16311C C16320T                                                             |
| NA19467 | A93G G185A A189G T236C G247A A263G 514delC 515delA A750G G769A<br>T825A G1018A C1048T A1438G A2245G A2706G G2758A T2885C C3516A<br>C3594T A4104G C4312T T4586C A4769G T5096C G5231A T5442C G5460A<br>C5603T T5964C T6185C C7028T A7146G C7256T G7521A A8188G C8428T<br>C8468T A8566G C8655T A8701G A8860G C9042T A9347G T9540C G9755A<br>C9818T A10398G G10589A C10664T G10688A T10810C T10873C T10915C<br>G11176A A11641G G11719A G11914A G12007A C12705T A12720G A13105G<br>A13276G C13506T C13650T T14231N T14308C G14569A C14766T C15136T<br>A15326G G15431A T15941C C16148T C16168T T16172C C16187T C16188G<br>T16189C C16223T A16230G C16257T C16287T A16293G T16311C C16320T<br>T16519C |
| NA19468 | A73G A263G A750G A1438G A2706G T2778C C3450T A4769G G5773A T6221C<br>T6743C C7028T A8701G A8860G C9449T T9540C A10086G G10373A A10398G<br>T10873C A11002G G11719A A11800G G11914A C12705T A13105G C13914A<br>C14766T G15301A A15311G A15326G A15824G G15883A 15942delT T16093C<br>T16124C C16223T C16278T T16362C T16519C                                                                                                                                                                                                                                                                                                                                                                      |
| NA19469 | A73G T152C C182T A263G G709A A750G G769A G1018A A1438G T2416C<br>A2706G C2789T C3594T A4104G A4562G A4769G A5045G A6752G C7028T<br>T7175C C7256T C7274T G7521A A7771G G8206A A8701G A8860G A9221G<br>T9540C G9932A T10115C A10398G T10873C G11719A C11767T G11914A<br>T11944C C12705T A13434G G13590A C13650T A13803G A13827G A14566G<br>C14766T G15301A A15326G C15939T C16111T T16189C C16223T T16229N<br>C16278T C16291T C16294T T16311C G16390A T16519C                                                                                                                                                                                                                                    |
| NA19470 | A73G T152C C182T A263G G709A A750G G769A G1018A A1438G T2416C<br>A2706G C2789T C3594T A4104G A4562G A4769G A5045G A6752G C7028T<br>T7175C C7256T C7274T G7521A G7706N A7771G G8206A A8701G A8860G<br>A9221G T9540C G9932A T10115C A10398G T10873C G11719A C11767T<br>G11914A T11944C C12705T A13434G G13590A C13650T A13803G A13827G<br>A14566G C14766T G15301A A15326G C15939T C16111T T16189C C16223T<br>T16229C C16278T C16291T C16294T T16311C G16390A T16519C                                                                                                                                                                                                                             |
| NA19471 | A73G T152C C182T G185C A189G T195C G247A A263G A357G G709A T710C<br>A750G G769A T825A G1018A T1738C T2352C A2706G G2758A A2768G T2885C<br>T3308C C3594T G3666A G3693A A4104G A4769G A5036G G5046A T5393C<br>T5655C C6548T T6827C A6989G C7028T A7055G A7146G C7256T T7389C                                                                                                                                                                                                                                                                                                                                                                                                                     |



|         |                                                                                                                                                                                                                                                                                                                                                                                                                                                                                                                                                                                                                                                                                                                                |
|---------|--------------------------------------------------------------------------------------------------------------------------------------------------------------------------------------------------------------------------------------------------------------------------------------------------------------------------------------------------------------------------------------------------------------------------------------------------------------------------------------------------------------------------------------------------------------------------------------------------------------------------------------------------------------------------------------------------------------------------------|
|         | G7521A C7867T A8248G C8468T C8655T A8701G A8860G T9540C A10398G G10688A T10810C T10873C G11719A T12519C C12705T A13105G C13506T C13650T T13789C C13880A G13980A T14178C A14203G G14560A C14766T A14769G T15115C G15217A A15326G G15773A T16126C C16187T T16189C C16223T C16264T C16270T C16278T A16293G T16311C T16519C                                                                                                                                                                                                                                                                                                                                                                                                        |
| NA19472 | A73G T152C A263G A750G A1438G A2706G C3450T A4769G G5773A T6221C C7028T A8701G A8860G C9449T T9540C A10086G G10373A A10398G T10873C A11002G G11719A A11800G C12705T A13105G C13914A C14766T G15301A A15311G A15326G A15824G G15883A 15942delT T16093C T16124C C16223T C16278T T16362C T16519C                                                                                                                                                                                                                                                                                                                                                                                                                                  |
| NA19473 | A73G A263G A750G A1438G A2706G C3450T A4769G G5773A T6221C C7028T A8701G A8860G C9449T T9540C A10086G G10373A A10398G T10873C A11002G G11719A A11800G C12705T A13105G C13914A C14766T G15301A A15311G A15326G A15824G G15883A 15942delT T16124C T16189C C16223T C16278T T16362C T16519C                                                                                                                                                                                                                                                                                                                                                                                                                                        |
| NA19474 | 42insC A93G T146C T152C T195C T236C G247A A263G A648G A723G A750G G769A T825A G1018A C1048T A1438G G1719A A2245G A2706G G2758A T2885C C3516A C3594T A4104G C4312T T4586C A4769G T5442C T5580C C5603T T6185C T6248C T6719C C7028T A7146G C7256T T7302C G7337A A7424G G7521A A8158G C8428T C8468T A8566G T8632C C8655T A8701G A8860G C9042T T9068C A9347G T9540C G9755A C9818T A10398G G10589A C10664T G10688A T10810C T10873C T10915C C11638T A11641G G11719A A11884G G11914A G12007A C12705T A12720G A13105G A13276G C13506T C13650T G14016A A14440G C14766T G15106A C15136T A15244G A15326G G15431A T15622C T15663C C15913T A16051G C16148T A16162G A16164G T16172C 16183delA T16189C C16223T A16230G G16255A C16278T T16311C |
| NA19475 | A73G A263G 514delC 515delA A750G A1438G A2706G C3450T A4769G G5773A T6221C C7028T A8701G A8860G C9449T T9540C A10086G G10373A A10398G T10873N A11002G G11719A A11800G C12705T A13105G C13914A C14766T G15301A A15311G A15326G A15824G G15883A 15942delT T16093C T16124C C16148T C16223T C16278T T16362C T16519C                                                                                                                                                                                                                                                                                                                                                                                                                |
| NA19625 | A73G G143A T146C T152C T195C A263G A750G G769A G1018A A1438G T2416C A2706G C2789T C3594T A4104G A4769G T5628C C7028T T7175C C7256T C7274T G7521A A7771G G8206A A8701G A8860G A9221G T9540C T10115C G10143A A10398G T10873C G11719A G11914A T11944C 12237delC A12693G C12705T G13590A C13650T A13803G A14566G C14766T G15301A A15326G T15784C C16187T C16188G T16189C C16214T C16223T C16278T C16294T A16309G G16390A                                                                                                                                                                                                                                                                                                           |
| NA19648 | A263G 310insC A750G A1438G G3010A A4769G A8860G A14687G A15326G T16093C C16270T T16519C                                                                                                                                                                                                                                                                                                                                                                                                                                                                                                                                                                                                                                        |
| NA19649 | A73G G228A A263G G499A A750G A827G A1438G A2706G A3547G A3663G A4769G G4820A T4977C C6473T C7028T T7954C 8281delC 8282delC 8283delC 8284delC 8285delC 8286delT 8287delC 8288delT 8289delA A8860G T9950C G10685A C11177T G11719A G13590A C14766T A15326G C15535T T16092C                                                                                                                                                                                                                                                                                                                                                                                                                                                        |

|         |                                                                                                                                                                                                                                                                                                                                                               |
|---------|---------------------------------------------------------------------------------------------------------------------------------------------------------------------------------------------------------------------------------------------------------------------------------------------------------------------------------------------------------------|
|         | C16111T C16148T A16183C T16189C T16217C T16325C G16483A T16519C                                                                                                                                                                                                                                                                                               |
| NA19651 | A73G T146C A153G A214G A235G A263G 514delC 515delA A663G A750G<br>A1438G A1736G A2706G T4248C A4769G A4824G T5267C C7028T G8027A<br>C8794T A8860G A9327G G11719A G12007A C12705T C14766T A15326G<br>C16111T C16223T C16290T G16319A A16326G T16362C T16519C                                                                                                   |
| NA19652 | A73G A263G A750G A1438G A2706G A3348G T4336C A4769G C7028T C8283T<br>A8860G A10397G A11467G G11719A A11947G A12308G G12372A G12501A<br>A12530G A14518G C14766T A15326G T16172C C16174T A16219G T16311C                                                                                                                                                        |
| NA19654 | 56delA T58A A73G G143A T152C A263G C308T 310delT G499A T593C A750G<br>A827G A1438G G1719A A2706G T2885C A3547G A4769G G4820A T4977C<br>C6473T C7028T 8281delC 8282delC 8283delC 8284delC 8285delC 8286delT<br>8287delC 8288delT 8289delA A8860G A9221T T9950C C11177T G11719A<br>G13590A C14766T A15326G C15535T A16182C 16183delA T16189C T16217C<br>T16519C |
| NA19655 | A263G 310insC A750G A1438G G3010A A4769G A8860G G8950A G12501A<br>A12507G C13662T A15326G T16519C                                                                                                                                                                                                                                                             |
| NA19657 | A73G 248delA A263G 286delA 287delA T489C A493G 514delC 515delA A750G<br>A1438G A2706G T3552A A4715G A4769G C7028T C7196A G8584A A8701G<br>A8860G T9540C A9545G A10398G C10400T T10873C T11025C G11719A<br>G11914A C12705T A13263G T14318C C14766T T14783C G15043A G15301A<br>A15326G A15487T C16223T T16298C T16325C C16327T T16509C                          |
| NA19660 | C64T A73G T146C A235G A263G A663G A750G A1438G A1736G A2706G<br>T4248C A4769G A4824G C7028T G7337A G8027A T8639C C8785G C8794T<br>A8860G C8947T G9039A A10097G G11719A G12007A C12705T G14016A<br>C14766T G15172A A15326G G16153A C16223T A16240G C16290T G16319A<br>T16362C                                                                                  |
| NA19661 | A73G G203A T204C A263G T489C A750G A1438G C2092T A2706G G3010A<br>A4769G C4883T C5178A C7028T T7861C C8414T A8701G A8860G T9540C<br>A10398G C10400T T10873C G11719A C12705T T13635C C14668T C14766T<br>T14783C G15043A G15301A A15326G T16093N C16223T G16274A T16325C<br>T16362C                                                                             |
| NA19663 | A73G T146C A153G A235G A263G A663G A750G A1438G A1736G A2706G<br>T4248C A4769G A4824G C7028T G8027A T8654C C8794T A8860G C9668T<br>T10604C G11719A G12007A C12705T C14766T A15326G T15458C C16111T<br>C16214T C16223T C16256T C16290T T16311C G16319A T16362C A16466C<br>T16519C                                                                              |
| NA19664 | C64T A73G T146C A235G A263G 514delC 515delA A663G A750G A1438G<br>A1736G A2706G T4248C A4769G A4824G C7028T G7337A G8027A T8639C<br>C8785G C8794T A8860G C8947T G9039A A10097G G11719A G12007A C12705T<br>G14016A C14766T G15172A A15326G G16153A C16223T A16240G C16290T<br>G16319A T16362C                                                                  |
| NA19672 | C64T A73G T146C A235G A263G A663G A750G A1438G A1736G A2706G<br>T4248C A4769G A4824G C7028T G7337A G8027A T8639C C8785G C8794T<br>A8860G C8947T G9039A A10097G G11719A G12007A C12705T G14016A                                                                                                                                                                |

|         |                                                                                                                                                                                                                                                                                                                                    |
|---------|------------------------------------------------------------------------------------------------------------------------------------------------------------------------------------------------------------------------------------------------------------------------------------------------------------------------------------|
|         | C14766T G15172A A15326G G16153A C16223T A16240G C16290T G16319A T16362C                                                                                                                                                                                                                                                            |
| NA19675 | C64T A73G T146C A153G A235G A263G 514delC 515delA A663G A750G A1438G A1736G A2706G T4248C A4769G A4824G C7028T G8027A C8794T A8860G T10535C G11719A G12007A C12705T C14766T A15326G C16111T C16223T C16290T G16319A T16362C G16390A T16519C A16525G                                                                                |
| NA19676 | C64T A73G T146C A153G A235G A263G A663G A750G A1438G G1598A A1736G G1888A A2706G T4248C T4454C A4769G A4824G C5839T C7028T G8027A C8794T A8860G T10274C G11719A G12007A C12705T T12811C C14766T A15326G C16111T C16223T C16290T G16319A A16335G T16362C G16526A                                                                    |
| NA19678 | C64T A73G T146C A153G A235G A263G 310insC 514delC 515delA A663G A750G A1438G A1736G A2706G T4248C A4769G A4824G C7028T G8027A C8794T A8860G T10535C G11719A G12007A C12705T C14766T A15326G C16111T C16223T C16290T G16319A T16362C G16390A T16519C A16525G                                                                        |
| NA19679 | A73G C150T A263G A533G A750G A1438G A2706G T3197C C3507A A4769G A5656G C7028T A7768G A8860G G9477A A11467G G11719A A12308G G12372A T13617C T14182C C14766T A15326G C16192T C16270T G16319A                                                                                                                                         |
| NA19681 | A73G A263G G499A A750G A827G A1438G A2706G A3547G A4129G A4769G G4820A T4977C C6473T C7028T 8281delC 8282delC 8283delC 8284delC 8285delC 8286delT 8287delC 8288delT 8289delA A8860G T9950C G10646A C11177T C11389T G11719A C12346T G13590A A14527G C14766T A15326G T15511C C15535T G16000A A16183C T16189C T16217C T16323C T16519C |
| NA19682 | A263G A750G A1842G A8860G G13708A A15326G C16291T T16519C                                                                                                                                                                                                                                                                          |
| NA19684 | A73G A263G 310insC G499A A750G A827G A1438G A2706G A3547G A4769G G4820A T4973C T4977C C6473T C7028T 8281delC 8282delC 8283delC 8284delC 8285delC 8286delT 8287delC 8288delT 8289delA A8860G T9950C A10792G C11177T G11719A G13590A C14766T A15244G A15326G C15535T G15884A A16183C T16189C T16217C C16259T T16357C C16467T T16519C |
| NA19685 | C64T A73G T146C A235G A263G 514delC 515delA A663G A750G A1438G A1736G A2706G T4248C A4769G A4824G C7028T G7337A G8027A T8639C C8785G C8794T A8860G C8947T G9039A A10097G G11719A G12007A C12705T G14016A C14766T G15172A A15326G G16153A C16223T A16240G C16290T G16319A T16362C                                                   |
| NA19700 | A73G C150T T152C T195C A263G A750G A1438G T2352C T2445C A2706G A4769G T6987G C7028T A8701G A8860G T9540C A10398G A10819G T10873C G11719A C12705T T14212C C14766T G14905A G15301A A15326G T16172C A16183C T16189C C16223T C16320T T16519C                                                                                           |
| NA19701 | A73G C150T A263G T489C A750G A1438G C2092T A2706G G3010A A4769G C4883T C5178A A6359G C7028T C7747T C8414T A8701G A8860G T9540C A10398G C10400T T10873C G11719A C12705T T13734C A13827G C14632T C14668T C14766T T14783C C14803T G15043A G15301A A15326G C15760T C16184T C16223T C16291T T16325C T16362C                             |
| NA19703 | A93G A95C G185A A189G T236C G247A A263G 514delC 515delA A750G G769A                                                                                                                                                                                                                                                                |

|         |                                                                                                                                                                                                                                                                                                                                                                                                                                                                                                                                                                                                                                                                                                             |
|---------|-------------------------------------------------------------------------------------------------------------------------------------------------------------------------------------------------------------------------------------------------------------------------------------------------------------------------------------------------------------------------------------------------------------------------------------------------------------------------------------------------------------------------------------------------------------------------------------------------------------------------------------------------------------------------------------------------------------|
|         | T825A G1018A C1048T T1291C A1438G A2245G A2706G G2758A T2885C C3516A G3591A C3594T A4104G C4312T T4586C A4769G T5096C G5231A T5442C G5460A C5603T C5911T T6185C C7028T A7146G C7256T G7521A T7686C A8191G C8428T C8468T A8566G C8655T A8701G A8860G C9042T A9347G T9540C G9755A C9818T A10398G G10589A C10664T G10688A T10810C T10873C T10915C G11176A A11641G G11719A G11914A G12007A G12127A C12705T A12720G A13105G A13276G C13506T C13650T A14007G T14308C C14766T C15136T A15326G G15431A G16129A C16148T C16168T T16172C C16187T C16188G T16189C C16223T A16230G C16278T A16293G T16311C C16320T                                                                                                      |
| NA19704 | A73G C150T T195C C198T A263G 310insC A750G A1438G A1737G A2124G T2352C A2706G A2765N C3852T A4769G T4823C T5774G C7028T C7196T A8701G A8860G T9540C A10398G A10819G T10873C G11719A C12705T A13105G T14212C C14766T G14869A G14905A G15301A A15326G A15924G C16223T C16320T T16519C                                                                                                                                                                                                                                                                                                                                                                                                                         |
| NA19707 | A73G C150T A189G T195C A263G 310insC A750G A1438G T2352C A2706G A4769G T4823C T6044C C7028T A8701G A8860G T9540C A10398G A10819G T10873C G11719A C12705T A13105G G13889A T14212C C14766T G14869A G14905A G15301A A15326G C16223T A16258T C16320T T16519C                                                                                                                                                                                                                                                                                                                                                                                                                                                    |
| NA19711 | A73G C150T T195C A263G 310insC 514delC 515delA A1438G C2000T T2352C A2706G G4655A A4769G G5262A T6524C C7028T A8701G A8860G T9228C T9540C G9554A A10398G T10667C A10816G A10819G T10873C G11719A A12248G C12705T A13101C C13197T A13651G T14212C C14766T G15301A A15326G G15812A C16223T A16265T T16519C                                                                                                                                                                                                                                                                                                                                                                                                    |
| NA19712 | A73G T152C C182T C186A A189C T195C C198T G247A A263G A297G G316A A574G A633G A723G A750G G769A T825A G1018A A1438G 2395delA A2706G G2758A T2885C G3421A C3594T G3666A T3777C A4104G A4769G T5580C A5894C A5951G T6071C G6150A T6253C C7028T A7055G A7076G A7146G C7256T G7337A T7389C G7521A G8027A C8468T C8655T A8701G A8784G A8860G T8877C A9072G T9540C T10031C T10071C T10321C A10398G G10586A G10688A A10792G C10793T T10810C T10873C A11164G A11654G G11719A C12049T C12705T A12810G A13105G A13149G A13485G C13506T C13650T T13789C T14000A T14178C G14560A C14766T C14911T A15326G T15672C C16187T T16189C C16223T A16265C C16278T C16286A C16292T C16294T T16304C T16311C C16360T T16519C C16527T |
| NA19713 | C64T A93G T152C A189G T204C G207A T236C G247A A263G 514delC 515delA A750G G769A T825A G1018A C1048T A1438G A2245G A2706G G2758A T2885C C3516A C3594T A4104G C4312T T4586C A4769G G5147A G5231A T5442C G5460A C5603T A5711G T6185C G6257A C7028T A7146G C7256T G7521A 8281delC 8282delC 8283delC 8284delC 8285delC 8286delT 8287delC 8288delT 8289delA C8428T A8460G C8468T A8566G C8655T A8860G T8939C C9042T G9142A A9347G T9540C A9545G G9554A G9755A C9818T A10398G G10589A C10664T G10688A T10810C T10873C T10915C C11143T A11172G G11176A A11641G G11719A G11914A G12007A C12705T A12720G A13105G C13116T                                                                                              |

|         |                                                                                                                                                                                                                                                                                                                                                       |
|---------|-------------------------------------------------------------------------------------------------------------------------------------------------------------------------------------------------------------------------------------------------------------------------------------------------------------------------------------------------------|
|         | A13276G C13506T C13650T T14308C A14755G C14766T G14905A C15136T<br>A15326G G15431A C16148T T16172C C16173T C16187T C16188G T16189C<br>C16223T A16230G T16311C C16320T T16519C                                                                                                                                                                         |
| NA19716 | A73G A263G T489C A750G A1438G C2092T A2706G G3010A A4769G A4790G<br>C4883T G5147A C5178A C7028T C8414T A8701G A8860G T9540C A10398G<br>C10400T T10873C T10915C G11719A T12414C C12705T T13161N C14668T<br>C14766T T14783C G15043A G15301A A15326G T16093C T16126C C16223T<br>T16325C T16362C G16398A                                                  |
| NA19717 | A73G A215G 248delA A263G 286delA 287delA T489C A750G A1438G G1888A<br>A2706G T3552A A4715G A4769G G5773A C7028T C7196A G8584A A8701G<br>A8860G T9540C A9545G A10398G C10400T T10873C G11719A A11866G<br>G11914A C12705T A13263G T14178C T14318C C14766T T14783C G15043A<br>G15301A A15326G A15487T G15930A C16223T T16298C T16325C C16327T<br>T16362C |
| NA19719 | A73G T195C A263G T489C A750G A1438G C2092T A2706G G3010A A4769G<br>C4883T C5178A C7028T C8414T A8701G A8860G T9540C T10007C A10398G<br>C10400T T10873C G11176A G11719A C12705T T14025C C14334T C14668T<br>C14766T T14783C G15043A G15301A A15326G G15928A C16186T T16189C<br>C16223T T16325C T16362C T16519C                                          |
| NA19720 | C64T A73G T146C A153G A235G A263G A663G A750G A1438G A1736G<br>A2706G T4248C A4769G A4824G C7028T G8027A C8794T A8860G G10586A<br>A11221G G11719A G12007A C12705T C14766T A14790G A15326G C16111T<br>C16223T C16290T T16362C T16519C                                                                                                                  |
| NA19722 | A73G G103A T146C A153G A235G A263G A663G A750G A1438G A1736G<br>A2706G G3591A T4248C A4769G A4824G C6935T C7028T G7521A G8027A<br>C8794T A8860G C9518T G11719A G12007A C12705T C14766T A15326G<br>C16111T C16223T C16290T G16319A T16362C                                                                                                             |
| NA19723 | C64T A73G T146C A153G A235G A263G A663G A750G A1438G A1736G<br>A2706G T4248C A4769G A4824G C7028T G8027A C8794T A8860G G11719A<br>G12007A C12705T C14766T A15326G T15629C C16114A C16223T C16290T<br>G16319A T16362C A16399G                                                                                                                          |
| NA19725 | T72C A263G G513A A750G A1438G A2706G G4580A A4769G C7028T A8860G<br>C14629T A15326G C15904T C16222T T16298C                                                                                                                                                                                                                                           |
| NA19726 | A73G 248delA A263G 286delA 287delA T489C A493G A750G A1438G A2706G<br>T3552A A4715G A4769G C7028T C7196A G7211A G8584A A8701G A8860G<br>T9540C A9545G A10398G C10400T T10873C T11152C G11719A G11914A<br>C12705T A13263G T14318C C14766T T14783C G15043A G15301A A15326G<br>A15487T C16223T T16298C T16325C C16327T                                   |
| NA19728 | A73G A263G T489C 513insC 513insA A750G A1438G A1735G C2092T A2558G<br>A2706G G3010A A3349G A3402G A4769G C4883T C5178A C5972T C7028T<br>C8414T A8701G A8860G T9540C T9716C A10398G C10400T T10873C G11719A<br>C12705T C14668T C14766T T14783C G15043A G15301A A15326G T15940C<br>T16093C C16223T C16239T C16260T G16274A T16325C T16362C              |
| NA19729 | C64T A73G G143A T146C A153G A235G A263G 514delC 515delA A663G A750G                                                                                                                                                                                                                                                                                   |

|         |                                                                                                                                                                                                                                                                                                                                                                 |
|---------|-----------------------------------------------------------------------------------------------------------------------------------------------------------------------------------------------------------------------------------------------------------------------------------------------------------------------------------------------------------------|
|         | A1438G A1736G A2706G T4248C A4769G A4824G C7028T G8027A C8794T A8860G G9039A G11719A G11914A G12007A C12705T C14766T A15326G C16111T C16223T C16290T G16319A T16325C T16362C                                                                                                                                                                                    |
| NA19731 | A73G A263G G499A 513insC 513insA A750G A827G A1438G A2706G A3547G A4769G G4820A T4977C C6473T C7028T A7241G 8281delC 8282delC 8283delC 8284delC 8285delC 8286delT 8287delC 8288delT 8289delA A8860G T9098C T9950C C11177T G11719A C12717T G13590A T14063C C14766T A15326G C15535T 16182delA 16183delA T16189C C16214T T16217C T16519C                           |
| NA19732 | A73G 248delA A263G 286delA 287delA T489C A750G A1438G G1462A G1888A A2706G T3552A A4715G A4769G C7028T C7196A A7766G G8584A A8701G A8860G T9540C A9545G A10398G C10400T T10873C G11719A G11914A C12705T A13263G T13879C T14318C T14581C C14766T T14783C G15043A T15262C G15301A A15326G A15487T G15930A G16129A T16189C C16223T T16298C T16325C C16327T T16519C |
| NA19734 | A73G T152C A183G A263G G499A A750G A827G A1438G A2706G A3547G A4769G G4820A T4977C C6473T C7028T A7241G C7849T 8281delC 8282delC 8283delC 8284delC 8285delC 8286delT 8287delC 8288delT 8289delA A8860G T9950C C11177T G11719A G13590A T14178C C14766T A15326G C15535T 16183delA C16184A T16189C T16217C T16519C                                                 |
| NA19735 | A73G T146C A263G G499A A750G A827G A1438G A2706G A3547G A4769G G4820A T4977C C6473T C7028T 8281delC 8282delC 8283delC 8284delC 8285delC 8286delT 8287delC 8288delT 8289delA A8860G T9950C C11177T C11218T G11719A G13590A C14766T A15326G C15535T T16124C 16183delA C16184A T16189C T16217C C16261T C16278T T16519C                                             |
| NA19737 | A263G C456T G513A A750G A1438G T4336C A4769G A8860G A12648G A15326G G15773A G15884A T16304C                                                                                                                                                                                                                                                                     |
| NA19738 | A73G 248delA A263G 286delA 287delA T489C A493G A750G A1438G A2706G T3552A A4715G A4769G C7028T C7196A G7211A G8584A A8701G A8860G T9540C A9545G A10398G C10400T T10873C T11152C G11719A G11914A C12705T A13263G T14318C C14766T T14783C G15043A G15301A A15326G A15487T C16223T T16298C T16325C C16327T                                                         |
| NA19740 | C64T A73G T146C A235G A263G A663G A750G A1438G A1736G A2706G T4248C A4769G A4824G C6491A C7028T A7403G G8027A C8794T A8860G G11377A G11719A G12007A C12705T C14766T A15326G C16111T C16223T C16239T C16290T G16319A T16362C T16519C                                                                                                                             |
| NA19741 | A73G A188G A263G G417A T489C A551G G709A A750G A1438G C2092T A2706G G3010A A4769G C4883T C5178A C5462T C7028T C8414T A8701G A8860G T9540C A10398G C10400T T10873C A11314G G11719A A12280G C12705T C14668T C14766T T14783C G15043A G15301A A15326G C15877A C16223T T16325C T16362C T16368C                                                                       |
| NA19746 | C64T A73G T146C A153G T195C T204C A235G A263G 514delC 515delA A663G A750G A1438G A1736G A2706G T4248C A4769G A4824G T5628C C7028T T7148C G8027A C8794T A8860G C8947T G9039A G10993A G11719A G12007A C12705T C14766T G15172A A15326G A15427G C16223T A16240G C16290T                                                                                             |

|         |                                                                                                                                                                                                                                                                                                                                                    |
|---------|----------------------------------------------------------------------------------------------------------------------------------------------------------------------------------------------------------------------------------------------------------------------------------------------------------------------------------------------------|
|         | G16319A T16362C T16519C                                                                                                                                                                                                                                                                                                                            |
| NA19747 | A73G A263G G417A T489C 513insC 513insA A750G A1438G A1943G C2092T A2706G G3010A A3828G A4769G C4883T C5178A C7028T T7084C T8277C C8414T A8701G A8860G T9540C A10398G C10400T T10873C G11719A A12280G C12705T C14668T C14766T T14783C G15043A G15301A A15326G C16176T C16223T T16325C T16362C T16519C                                               |
| NA19749 | A73G A263G 310insC G499A A750G A827G A1438G A2706G A3547G A4769G G4820A T4977C C6473T C7028T 8281delC 8282delC 8283delC 8284delC 8285delC 8286delT 8287delC 8288delT 8289delA A8860G G9804A T9950C C11177T G11719A G13590A C14766T A15326G C15535T C16111T A16182C A16183C T16189C T16217C T16224C G16483A T16512C T16519C                         |
| NA19750 | A263G A750G A1438G A4769G A8860G G14323A A15326G C16355T T16519C                                                                                                                                                                                                                                                                                   |
| NA19752 | A73G A263G T267C T489C A750G A1438G C2092T A2706G G3010A A4769G C4883T C5178A G6260A C7028T C8414T A8701G A8860G T9540C A10398G C10400T T10873C A11593T G11719A C12705T C14668T C14766T T14783C G15043A G15301A A15326G C16223T G16274A T16325C T16362C                                                                                            |
| NA19753 | A73G 248delA A263G 286delA 287delA T489C A493G 514delC 515delA A750G A1438G A2706G T3552A A4715G A4769G C7028T C7196A G8584A A8701G A8860G T9540C A9545G A10398G C10400T T10873C T11025C G11719A G11914A C12705T A13263G T14318C C14766T T14783C G15043A G15301A A15326G A15487T C16223T T16298C T16325C C16327T T16509C                           |
| NA19755 | A73G A263G T489C A750G A1438G C2092T A2706G G3010A A4769G C4883T C5178A C7028T C8414T A8701G A8860G T9540C A10398G C10400T T10873C A11026G G11719A C12705T G13368A C14668T C14766T T14783C G15043A G15301A A15326G C16223T T16325C T16362C T16519C                                                                                                 |
| NA19756 | C64T A73G T146C A153G A235G A263G 514delC 515delA A663G A750G A1438G A1736G A2706G T4248C A4769G A4824G C7028T G8027A C8794T A8860G T10595C A11548G G11719A G12007A C12705T C14766T A15326G C16111T G16156A C16223T C16290T T16311C G16319A T16362C                                                                                                |
| NA19758 | C64T A73G T146C T152C A153G A235G A263G 514delC 515delA A663G A750G A1438G A1736G A2706G T4248C A4769G A4824G C6491A C7028T A7403G G8027A C8794T A8860G G11377A G11719A G12007A C12705T C14766T A15326G C16111T C16223T C16239T C16290T G16319A T16362C T16519C                                                                                    |
| NA19759 | A73G C140T A263G T489C A750G A1438G C2092T A2706G G3010A A4769G C4883T C5178A C7028T C8414T G8592A T8848C A8860G T9540C A10398G C10400T T10873C G11719A A11884G C12705T A13681G T14470C C14668T C14766T T14783C G15043A G15301A A15326G C16104T C16223T T16325C T16357C T16362C                                                                    |
| NA19761 | A73G A263G 310insC G499A 514delC 515delA A750G A827G A1438G A2706G A2707G A3547G A4769G G4820A T4977C C6473T C7028T 8281delC 8282delC 8283delC 8284delC 8285delC 8286delT 8287delC 8288delT 8289delA A8860G T9950C C11177T G11719A A12544G G13590A C14766T A15326G C15535T A15766G A15805G A16164G A16183C T16189C T16217C T16304C T16325C T16519A |

|         |                                                                                                                                                                                                                                                                                                                                                              |
|---------|--------------------------------------------------------------------------------------------------------------------------------------------------------------------------------------------------------------------------------------------------------------------------------------------------------------------------------------------------------------|
| NA19762 | A73G T195C 248delA A263G 286delA 287delA T489C A493G A750G A1438G A2706G T3552A A4715G A4769G C7028T C7196A G8584A A8701G A8860G T9540C A9545G A10398G C10400T T10873C G11719A G11914A C12705T A13263G T13635C T14318C C14766T T14783C G15043A G15301A A15326G T15470C A15487T C16223T T16298C T16311C T16325C C16327T T16519C                               |
| NA19764 | C64T A73G T146C A153G A235G A263G 514delC 515delA A663G A750G A1438G A1736G A2706G T4248C A4769G A4824G C6308T C7028T G8027A C8794T A8860G G11719A G12007A C12705T T13830C C14766T A15326G C16069T C16111T C16223T A16247G C16290T G16319A T16362C G16526A                                                                                                   |
| NA19770 | C64T A73G T146C A153G A235G A263G 514delC 515delA A663G A750G A1438G A1736G A2706G T4248C A4769G A4824G G4991A T5494G C7028T G8027A C8794T A8860G C10307T A11248G G11719A G12007A C12705T C14766T A15326G G16213A C16223T C16290T G16319A T16362C                                                                                                            |
| NA19771 | A73G A263G 310insC G499A A750G A827G A1438G C1619T A2706G A3547G A4769G G4820A A4890G T4977C C6473T C7028T 8281delC 8282delC 8283delC 8284delC 8285delC 8286delT 8287delC 8288delT 8289delA A8860G T9950C C11177T G11719A A13434G G13590A C14766T A15326G C15535T T16093C C16148T 16183delA C16186T T16189C T16217C C16292T T16519C                          |
| NA19773 | A73G 248delA A263G 286delA 287delA T489C A493G 514delC 515delA G709A A750G A1438G A2706G T3552A A4715G A4769G A5894G A6872G C7028T C7196A G8584A A8701G A8860G T9540C A9545G A10397G A10398G C10400T T10873C G11719A G11914A C12705T A13263G T13953C T14318C C14766T T14783C G15043A G15301A A15326G A15487T T16172C A16181G C16223T T16298C T16325C C16327T |
| NA19774 | A73G T146C A153G A235G A263G 514delC 515delA A663G A750G A1438G A1736G A2706G T4248C A4769G A4824G A5114G C7028T G8027A C8794T A8860G G11719A G12007A C12705T C14766T A15326G C16111T G16145A C16223T C16290T G16319A T16362C                                                                                                                                |
| NA19776 | A73G A189G C194T T195C T199C T204C G207A A263G G545A G709A A750G T1243C A1438G A2706G A3505G A4769G G5046A G5147A G5460A C7028T G8251A G8697A A8860G G8994A C11674T G11719A A11947G T12414C C12705T T12879C C14766T G15314A A15326G G15884C C16223T C16292T T16519C                                                                                          |
| NA19777 | C64T A73G T146C A153G A235G A263G 514delC 515delA A663G A750G A1438G G1442A A1736G T1738C A2706G T4248C A4769G A4824G A5378G C6065T C7028T G8027A C8794T A8860G G10373A G11719A G12007A C12705T C14766T A15326G C16223T C16270T C16290T G16319A T16362C                                                                                                      |
| NA19779 | G207A A263G A750G A1438G C3885N A4769G A8860G C12636T T14470A A15326G T16093C C16221T T16519C                                                                                                                                                                                                                                                                |
| NA19780 | A73G A263G T310N G499A A750G A827G A1438G A2706G A3547G A4769G G4820A T4977C C6473T C7028T 8281delC 8282delC 8283delC 8284delC 8285delC 8286delT 8287delC 8288delT 8289delA T8567C A8860G T9950C C11177T G11719A A11731G T12616C G13590A T13740C C14766T A15326G C15535T C16111T T16152C A16182C A16183C T16189C T16217C T16325C                             |



|         |                                                                                                                                                                                                                                                                                                                                                                                           |
|---------|-------------------------------------------------------------------------------------------------------------------------------------------------------------------------------------------------------------------------------------------------------------------------------------------------------------------------------------------------------------------------------------------|
|         | T16519C                                                                                                                                                                                                                                                                                                                                                                                   |
| NA19782 | C64T A73G T146C T152C A153G A235G A263G 514delC 515delA A663G A750G C869T A1438G A1736G A2706G T4248C A4769G A4824G A5033G C7028T T7861C G8027A C8794T A8860G G11719A G12007A C12705T C14766T A15326G C16111T T16124C C16223T C16290T G16319A T16362C T16452C T16519C                                                                                                                     |
| NA19783 | C64T A73G T146C A153G A235G A263G 514delC 515delA A663G A750G A1438G A1736G A2706G T4248C A4769G A4824G A6110G C7028T G8027A C8794T A8860G C9761T G11719A G12007A C12705T C14766T A15326G C16111T C16148T T16189C C16223T C16290T G16319A A16326G T16362C                                                                                                                                 |
| NA19785 | A73G A210G A263G C309T T310C T480C G499A C592T A750G A1438G G1462A A2706G A3426G A3547G A4769G G4820A T4977C G5147A C6473T C7028T A7424G 8281delC 8282delC 8283delC 8284delC 8285delC 8286delT 8287delC 8288delT 8289delA A8860G T9950C C11177T G11719A G11914A G13590A C14766T G15301A A15326G C15535T A16183C T16189C 16195delT T16217C A16258C T16263C T16422C G16438A C16465T T16519C |
| NA19786 | A73G 248delA A263G 286delA 287delA T489C A493G 514delC 515delA A750G A1438G A2706G T3552A A4715G A4769G C7028T C7196A G8584A A8701G A8860G T9540C A9545G A10398G C10400T T10873C T11025C G11719A G11914A C12705T A13263G T14318C C14766T T14783C G15043A G15301A A15326G A15487T C16223T T16298C T16325C C16327T T16509C                                                                  |
| NA19788 | A73G G203A T204C 248delA A263G 286delA 287delA T489C A493G 514delC 515delA A750G A1438G A2706G T3552A A4715G A4769G C7028T C7196A T8567C G8584A A8701G A8860G T9540C A9545G A10398G C10400T T10873C G11719A G11914A G12630A C12705T A13263G T14318C C14766T T14783C G15043A G15301A A15326G A15487T T16126C C16223T T16298C T16325C C16327T T16519C                                       |
| NA19789 | C64T A73G T146C A153G A235G A263G 514delC 515delA A663G A750G A1438G A1736G A2706G T4248C A4769G A4824G A5558G C6308T C7028T G8027A 8281delC 8282delC 8283delC 8284delC 8285delC 8286delT 8287delC 8288delT 8289delA T8548C C8794T A8860G A11314G G11719A G12007A C12705T C14766T A15326G C16111T C16223T G16274A C16290T G16319A T16362C                                                 |
| NA19794 | C64T A73G T146C A153G A235G A263G 514delC 515delA A663G A723C A750G G1007A A1438G A1736G A2706G A3972G T4248C A4769G A4824G C7028T G8027A T8744C C8794T A8860G G11719A G12007A C12705T A13032G C14766T A15326G C16223T C16290T G16319A T16362C                                                                                                                                            |
| NA19795 | A73G T152C C182T A263G G499A A750G A827G A1438G A2706G A3547G A4191G A4769G G4820A T4977C G6383A C6473T C7028T G8020A 8281delC 8282delC 8283delC 8284delC 8285delC 8286delT 8287delC 8288delT 8289delA A8860G T9950C C11177T G11719A G13590A C14766T A15326G C15535T C16167T 16183delA C16184A T16189C T16217C T16304C T16519C                                                            |
| NA19818 | A73G C150T A189G A200G A263G A750G A1438G T2352C A2706G A4769G C5255T T6221C C6587T C7028T G7337A A8701G A8860G T9540C A10819G                                                                                                                                                                                                                                                            |

|         |                                                                                                                                                                                                                                                                                                                                                                                                                                                                                                                                                                                                                                                                                                                                                                                        |
|---------|----------------------------------------------------------------------------------------------------------------------------------------------------------------------------------------------------------------------------------------------------------------------------------------------------------------------------------------------------------------------------------------------------------------------------------------------------------------------------------------------------------------------------------------------------------------------------------------------------------------------------------------------------------------------------------------------------------------------------------------------------------------------------------------|
|         | T10873C G11719A C12705T A14152G T14212C C14766T G15301A A15326G<br>T15670C T15942C C16185T C16223T C16327T T16519C                                                                                                                                                                                                                                                                                                                                                                                                                                                                                                                                                                                                                                                                     |
| NA19819 | A73G C150T T152C T195C A263G A647G A750G A1438G T2352C A2706G<br>A3606G A4769G C7028T A8701G A8860G T9540C G10098T A10398G A10819G<br>T10873C T11260C G11719A C12705T T14212C C14766T G14905A G15301A<br>A15326G T16172C T16189C C16223T C16260T C16320T T16519C                                                                                                                                                                                                                                                                                                                                                                                                                                                                                                                       |
| NA19834 | A73G T152C C182T G185T T195C G247A A263G A357G G709A T710C A750G<br>G769A T825A G1018A T1738C T2352C A2706G G2758A A2768G T2885C<br>T3308C C3594T G3666A G3693A A4104G A4769G A5036G G5046A G5177A<br>T5393C T5655C C6548T T6827C A6989G C7028T A7055G A7146N C7256T<br>T7389C G7521A C7867T A8248G C8468T C8655T A8701G A8860G T9540C<br>A9983G A10398G G10688A T10810C T10873C G11719A T12519C C12705T<br>A13105G C13506T C13650T T13789C C13880A T14178C A14203G G14560A<br>C14766T A14769G T15115C A15326G T16093C T16126C C16187T T16189C<br>C16223T C16264T C16270T C16278T T16311C T16519C                                                                                                                                                                                      |
| NA19835 | A73G A93G T146C C150T T152C C182T T195C C198T A263G C325T T680C<br>G709A A750G G769A G1018A A1438G G1442A C2332T T2416C A2706G T3200A<br>C3594T A4104G G4596A A4769G G5262A C7028T C7256T G7521A T7624A<br>G8206A A8701G A8860G A9221G T9540C T10115C A10398G T10873C G11016A<br>G11719A T11944C G12236A C12705T G13135A G13590A C13650T G13708A<br>G13711A G13928C G13958C C14766T G15110A G15217A G15301A A15326G<br>C15849T C16223T C16278T G16390A                                                                                                                                                                                                                                                                                                                                 |
| NA19900 | A73G C150T A189G T195C A263G A1438G C2000T T2352C A2706G G4655A<br>A4769G G5262A T6524C C7028T A8701G A8860G T9540C G9554A A10398G<br>T10667C A10816G A10819G T10873C G11719A G11914A A12248G C12705T<br>A13101C C13197T A13651G T14212C C14766T G15301A A15326G G15812A<br>T16093C C16223T A16265T T16519C                                                                                                                                                                                                                                                                                                                                                                                                                                                                            |
| NA19901 | A73G A189G A200G A263G A750G A1438G T1822C A2706G T3396C T4218C<br>A4769G C5601T C7028T C7819A C8410T A8527G A8701G A8860G C8932T<br>T9540C T9950C C10070T A10398G T10873C G11440A G11719A C12705T<br>C14766T A14769G G15301A A15326G T15514C 15942delT G16129A T16209C<br>C16223T C16292T C16295T T16311C T16519C                                                                                                                                                                                                                                                                                                                                                                                                                                                                     |
| NA19904 | C64T A93G C150T T152C A189G T204C G207A T236C G247A A263G A750G<br>G769A T825A G1018A C1048T A1438G A2245G A2706G G2758A T2885C<br>C3516A C3594T A4104G C4312T T4586C A4769G G5147A G5231A T5442C<br>G5460A C5603T A5711G T6185C G6257A C7028T A7146G C7256T G7521A<br>8281delC 8282delC 8283delC 8284delC 8285delC 8286delT 8287delC 8288delT<br>8289delA C8428T A8460G C8468T A8566G C8655T A8701G A8860G C9042T<br>A9347G T9540C A9545G G9554A G9755A C9818T A10398G G10589A C10664T<br>G10688A T10810C T10873C T10915C C11143T A11172G G11176A A11491G<br>A11641G G11719A G11914A G12007A C12705T A12720G A13105G C13116T<br>A13276G C13506T C13650T T14308C A14755G C14766T C15136T A15326G<br>G15431A C16148T T16172C C16187T C16188G T16189C C16223T A16230G<br>T16311C C16320T |

|         |                                                                                                                                                                                                                                                                                                                                                                                                                                                                                                                                                                                                                                        |
|---------|----------------------------------------------------------------------------------------------------------------------------------------------------------------------------------------------------------------------------------------------------------------------------------------------------------------------------------------------------------------------------------------------------------------------------------------------------------------------------------------------------------------------------------------------------------------------------------------------------------------------------------------|
| NA19908 | A73G G143A T146C T152C T195C A263G 514delC 515delA A750G G769A G1018A A1438G T2416C A2706G C2789T G3010A C3594T A4104G A4435G A4769G G6267A A6663G C7028T T7175C C7256T C7274T G7521A A7771G G8206A A8701G A8860G A9221G T9540C T10115C A10398G T10873C C11197T G11719A G11914A T11944C A12693G C12705T G13590A C13650T A13803G A14566G C14766T G15301A A15326G T15784C C16223T C16278T C16294T A16309G G16390A                                                                                                                                                                                                                        |
| NA19909 | A73G T152C C182T G185T A189G G247A A263G A357G G709A T710C A750G G769A T825A G1018A T1738C T2352C A2706G G2758A A2768G T2885C T3308C C3594T G3666A G3693A A4104G A4769G A6040G C6548T T6827C A6989G C7028T A7055G A7146G C7256T T7389C G7521A C7867T A8248G C8468T C8655T A8701G A8860G T9540C A10398G G10688A T10810C T10873C G11719A A11812G T12519C C12705T C12891T A13105G A13470G C13506T C13650T T13789C A13893G A14152G T14178C G14323A G14560A C14766T A14769G T15115C A15326G T16126C C16187T T16189C C16223T C16239T C16264T C16270T C16278T C16292T A16293G T16311C T16519C                                                 |
| NA19914 | A73G C151T T152C C182T C186A A189C G247A A263G G316A A750G G769A A783G T825A G1018A A1438G 2395delA A2706G G2758A T2885C A3105G C3594T G3666A A4104G A4769G A5951G T6071C T6221A G6260A G6917A C7028T A7146G C7256T T7389C G7498A G7521A G7789A G8027A C8468T C8655T T8668C A8701G A8860G A9072G T9540C G9966A A10398G G10586A G10688A T10810C T10873C C11302T G11719A C12019T G12501A C12705T A12810G A13105G A13485G C13506T C13650T T13789C T14000A T14178C G14560A C14766T C14911T A15226G A15326G T15905C C15978T T16093C G16129A A16183C T16189C A16215G C16223T C16234T C16278T C16294T T16311C C16355T C16360T G16390A T16519C |
| NA19916 | A73G C182T G185T A189G T195C G247A A263G A357G 514delC 515delA 573insC G709A T710C A750G G769A T825A G1018A T1738C T2352C A2706G G2758A A2768G T2885C T3308C C3594T G3666A G3693A A4104G A4769G A5036G G5046A T5393C T5655C G6446A C6548T T6827C A6989G C7028T A7055G A7146G C7256T T7389C G7521A C7867T A8248G C8468T C8655T A8701G A8860G T9540C A10398G G10688A T10810C T10873C G11719A T12519C C12705T A13105G C13506T C13650T T13789C C13880A T14178C A14203G G14560A C14766T A14769G T15115C A15326G T16126C C16187T T16189C C16223T C16264T C16270T C16278T T16311C T16519C                                                     |
| NA19917 | A73G C151T T152C C182T C186A A189C T195C C198T G247A A263G A297G G316A T416A C518N C520T A750G G769A T825A G1018A T1291C A1438G 2395delA A2706G G2758A T2885C C3594T G3666A A3796T G3834A A3843G A4104G T4589C T4688C A4769G A5480G T5553C A5951G T6071C C7028T A7055G A7146G C7196T C7256T T7389C G7521A T7660C G8027A G8155A C8468T C8619T C8655T A8701G A8860G A9072G T9540C T9861C T10084C T10321C A10398G G10586A G10688A T10810C T10873C G11719A T11899C T12681C C12705T A12810G A13105G A13485G C13506T C13650T T13789C T13874C T14000A A14148G T14178C A14393G G14560A C14766T C14911T                                         |

|         |                                                                                                                                                                                                                                                                                                                                                                                                                                                                                                                                        |
|---------|----------------------------------------------------------------------------------------------------------------------------------------------------------------------------------------------------------------------------------------------------------------------------------------------------------------------------------------------------------------------------------------------------------------------------------------------------------------------------------------------------------------------------------------|
|         | A15326G T16086C G16129A C16187T T16189C C16223T A16241G C16278T<br>A16293G C16294T T16311C C16360T T16519C                                                                                                                                                                                                                                                                                                                                                                                                                             |
| NA19920 | A73G C151T T152C A189C T195C A263G T294C A606G A750G T990C A1438G<br>G1664A G1719A A2706G A4388G A4769G C5300T C7028T T7861C A8701G<br>A8842G A8860G T9509C T9540C G9575A T9758C A10044G A10398G A10754G<br>T10873C T11287C A11590G G11719A C12705T C12882T A13105G G13194A<br>T13437C G14364A G14410A C14766T A14793G G15301A A15326G G15355A<br>G16129A T16172C C16174T C16192T C16218T C16223T C16256A T16311C<br>T16362C T16519C                                                                                                   |
| NA19921 | A73G C150T T195C A263G A750G A1438G T2352C A2706G A4769G T4823C<br>C7028T A8701G A8860G T9098C T9540C A10398G A10819G T10873C G11719A<br>C12705T A13105G T14212C C14766T G14869A G14905A G15301A A15326G<br>C16223T C16320T T16519C                                                                                                                                                                                                                                                                                                    |
| NA19922 | A73G T152C A263G T318C A750G T921C A1438G G1719A A2706G C3498G<br>T4688C A4769G G5147A C7028T A7424G G8251A T8618C A8701G A8860G<br>T9540C A10398G T10873C A10899G A11404G G11719A C12705T A13105G<br>T13886C C14284T C14766T A15061G A15208G G15301A A15326G T16124C<br>16189delT C16223T C16278T T16304C T16311C                                                                                                                                                                                                                     |
| NA19923 | A73G G143A T146C T152C T195C C198T A263G A750G G769A G1018A<br>A1438G T2416C G2702A A2706G C2789T G3010A C3594T A4104G A4769G<br>A5843G A6663G C7028T T7175C C7256T C7274T G7521A A7771G C7858T<br>G8206A A8701G A8860G A9221G T9540C G9932A T10115C A10398G T10873C<br>A11167N A11350G G11719A G11914A T11944C A12693G C12705T G13590A<br>C13650T C13653T A13803G T14374C A14566G C14766T T15115C G15301A<br>A15326G T15394C T15784C C16223T C16278T C16290T C16294T A16309G<br>G16390A T16519C                                       |
| NA19982 | A73G C150T A200G A263G T489C A750G A2706G C3588T A4769G C7028T<br>A7960G A8701G C8768T G8854A A8860G T9540C A10398G C10400T T10873C<br>G11719A C12705T A13308G G13590A G13708A C14130T A14260G A14527G<br>C14766T T14783C G15043A G15172A G15301A A15326G C15625T T16086C<br>C16148T C16223T C16259T C16278T G16319A A16399G G16526A                                                                                                                                                                                                   |
| NA19984 | A73G 149delT C150T T152C C182T T195C C198T T204C A263G C418T A750G<br>G769A G1018A A1438G G1442A C1706T C2332T A2358G T2416C A2706G<br>C3594T A4104G A4158G T4370C A4767G A4769G C5027T C5331A T5814C<br>G6026A C6713T C7028T C7256T G7521A T7624A C8080T G8206A G8387A<br>A8701G G8856A A8860G A9221G T9540C T10115C A10398G T10828C T10873C<br>G11719A T11944C G12236A C12705T A12948G G13590A C13650T C13924T<br>A14059G C14766T G15110A G15217A G15301A A15326G C16114A G16129A<br>G16213A C16223T C16278T C16355T T16362C G16390A |
| NA19985 | C64T A93G T152C A189G T204C G207A T236C G247A A263G 514delC 515delA<br>A750G G769A T825A G1018A C1048T G1273A A1438G A2245G A2706G<br>G2758A T2885C C3516A C3594T A4104G C4312T T4586C A4769G G5147A<br>G5231A T5442C G5460A C5603T A5711G T6185C G6257A C7028T A7146G<br>C7256T G7521A 8281delC 8282delC 8283delC 8284delC 8285delC 8286delT                                                                                                                                                                                          |

|         |                                                                                                                                                                                                                                                                                                                                                                                                                                                                                                                                                                                                                                    |
|---------|------------------------------------------------------------------------------------------------------------------------------------------------------------------------------------------------------------------------------------------------------------------------------------------------------------------------------------------------------------------------------------------------------------------------------------------------------------------------------------------------------------------------------------------------------------------------------------------------------------------------------------|
|         | 8287delC 8288delT 8289delA C8428T A8460G C8468T A8566G C8655T A8860G T8939C C9042T G9142A A9347G T9540C A9545G G9554A G9755A C9818T A10398G G10589A C10664T G10688A T10810C T10873C T10915C C11143T A11172G G11176A A11641G G11719A G11914A G12007A C12705T A12720G A13105G C13116T A13276G C13506T C13650T T14308C A14755G C14766T G14905A C15136T A15326G G15431A C16148T T16172C C16173T C16187T C16188G T16189C C16223T A16230G T16311C C16320T T16519C                                                                                                                                                                        |
| NA20126 | A73G T146C T152C T195C A263G A731G A750G G769A G1018A A1438G T2416C A2706G C2789T C3594T A4104G A4769G A5581G C7028T T7175C C7256T C7274T G7521A A7771G G8206A A8701G A8860G A9221G T9540C T10115C A10398G T10873C G11719A G11914A T11944C A12693G C12705T G13590A C13650T A13803G A14566G C14766T G15301A A15326G T15784C T16189C C16192T C16223T C16278T C16294T A16309G G16390A                                                                                                                                                                                                                                                 |
| NA20127 | A73G A93G T146C C150T T152C C182T T195C C198T A263G C325T 514delC 515delA T680C G709A A750G G769A G1018A A1438G G1442A C2332T T2416C A2706G T3200A C3594T A4104G G4596A A4769G A5351G T5999C A6752G C7028T C7256T A7424G G7521A T7624A G8206A A8701G A8860G A9221G T9540C T10115C A10398G T10873C G11719A T11944C G12236A C12705T G13590A C13650T G13928C G13958C T14319C C14766T G15110A G15217A G15301A A15326G C15849T A16051G C16223T C16278T G16390A                                                                                                                                                                          |
| NA20276 | A73G G143A T146C T152C T195C A263G 573insC T650C A750G G769A G1018A A1438G T2222C T2416C A2706G C2789T A3221G C3594T G3918A A4104G A4769G A5285G G5460A C7028T T7175C C7256T C7274T G7521A A7771G G8206A A8701G A8860G T9165C A9221G T9540C T10115C A10398G T10873C G11719A G11914A T11944C A12693G C12705T G13590A C13650T A13803G A14566G C14766T A15244G G15301A A15326G T15629C T15784C C16223T C16278T C16294T A16309G G16390A T16519C                                                                                                                                                                                        |
| NA20278 | A73G C150T T195C C198T A263G 310insC G499A A750G A1438G T2352C A2706G A4769G T4823C T6413C C7028T A8701G A8860G T9540C A10398G A10819G T10873C T11353C G11719A C12705T A13105G T14212C C14766T G14869A G14905A G15301A A15326G C16223T C16320T A16399G T16519C                                                                                                                                                                                                                                                                                                                                                                     |
| NA20281 | A73G C151T T152C C182T C186A A189C T195C C198T G247A A263G A297G G316A 514delC 515delA A750G G769A T825A G1018A A1438G 2395delA A2706G G2758A T2885C C3594T G3666A A3796T A3843G A4104G C4167T A4769G T5108C G5460A A5951G T6071C C7028T A7055G A7146G C7256T T7389C G7521A C7948T G8027A C8468T C8655T C8657T A8701G A8860G A9072G T9540C T10321C A10398G G10586A G10688A T10810C T10873C G11719A T11899C G11914A C12705T A12810G A13105G A13485G C13506T C13650T T13789C T14000A A14148G T14178C G14560A C14766T C14911T G15301A A15326G C15626T A16038G C16187T T16189C C16223T C16278T A16293G C16294T T16311C C16360T T16519C |
| NA20282 | A73G T152C C182T G185T T195C G247A A263G A357G 514delC 515delA G709A T710C A750G G769A T825A G1018A T1738C T2352C A2706G G2758A A2768G T2885C T3308C C3594T G3666A G3693A G3849A A4104G A4769G                                                                                                                                                                                                                                                                                                                                                                                                                                     |

|         |                                                                                                                                                                                                                                                                                                                                                                                                                                                                                                                                                                                                                  |
|---------|------------------------------------------------------------------------------------------------------------------------------------------------------------------------------------------------------------------------------------------------------------------------------------------------------------------------------------------------------------------------------------------------------------------------------------------------------------------------------------------------------------------------------------------------------------------------------------------------------------------|
|         | A5036G G5046A T5393C T5655C C6548T T6671C T6827C A6989G C7028T A7055G A7146G C7256T T7389C G7521A C7867T A8248G C8468T C8655T A8701G G8790A A8860G T9540C A10398G G10688A T10810C T10873C G11719A T12519C C12705T A13105G C13506T C13650T T13789C C13880A T14178C A14203G G14560A C14766T A14769G T15115C A15326G C16114G T16126C C16187T T16189C C16223T C16264T C16270T C16278T A16293G T16311C T16519C                                                                                                                                                                                                        |
| NA20287 | A73G T146C T152C T195C A263G A750G G769A G1018A A1438G T2416C A2706G C2789T C3594T G3918A A4104G A4769G A5285G C7028T T7175C C7256T C7274T G7521A A7771G G8206A A8701G A8860G A9221G T9540C T10115C A10398G T10454C T10873C G11719A G11914A T11944C A12693G C12705T G13590A C13650T A13803G A14566G C14766T C15211T A15244G G15301A A15326G T15629C T15784C C16223T C16278T C16286T C16294T A16309G G16390A T16519C                                                                                                                                                                                              |
| NA20289 | A73G T152C C182T G185T T195C G247A A263G A357G 514delC 515delA G709A T710C A750G G769A T825A G1018A T1738C A1842G T2352C A2706G G2758A A2768G T2885C T3308C C3594T G3666A G3693A A4104G A4769G A5036G G5046A T5393C T5655C C6548T T6827C A6989G C7028T A7055G A7146G C7256T T7389C G7521A C7867T A8248G C8468T C8655T A8701G T8762C G8790A A8860G T9540C A10398G G10688A T10810C T10873C G11719A T12519C C12705T A13105G G13194A C13506T C13650T T13789C C13880A T14178C A14203G G14560A C14766T A14769G T15115C A15326G C16114G T16126C C16187T T16189C C16223T C16264T C16270T C16278T A16293G T16311C T16519C |
| NA20291 | A73G C150T A263G 310insC 514delC 515delA A1438G T2352C A2706G G3915A A4769G G5262A A5584G C7028T A8688C A8701G A8860G T9540C A10398G A10819G T10873C G11149A C11257T G11719A C12705T C13749T T14173C T14212C C14766T G15301A A15326G A16051G C16223T C16264T T16519C                                                                                                                                                                                                                                                                                                                                             |
| NA20294 | A73G T146N T152C A263G 310insC 573insC A750G T921C A1438G A2706G A4769G G5046A G5147A T6680C C7028T A7424G T8618C A8701G A8860G T9540C A10398G T10873C A11239G G11719A T12616C C12705T A13105G T13886C G14040A C14284T T14634C C14766T G15110A G15301A A15326G T15449N T16124C T16189C C16223T C16256T                                                                                                                                                                                                                                                                                                           |
| NA20296 | A73G T152C A189G T195C A263G 514delC 515delA A750G T921C A1438G A2706G A4769G G5147A C7028T A7424G T8618C A8701G A8860G T9540C A10398G T10873C G11719A C12705T A13105G T13886C C14284T C14766T G15301A A15326G T15941C T16124C C16223T                                                                                                                                                                                                                                                                                                                                                                           |
| NA20298 | A73G 152delT A263G C494T 730delA A750G A1438G G1888A A3426G G3918A A4164G A4769G T6620G C7028T T8516C A8649G A8701G A8860G T9467C T9540C T10324C A10398G A10819G T10873C G11719A A12082G C12705T G13135A C13992T C14097T C14248T C14766T G15301A G15314A A15326G A15758G C16214T C16223T T16311C G16319A G16361A T16519C                                                                                                                                                                                                                                                                                         |
| NA20299 | A73G 248delA A259G A263G 286delA 287delA T489C A493G 514delC 515delA A750G A1438G A2706G T3552A A4769G T5981C C7028T C7196A G8584A                                                                                                                                                                                                                                                                                                                                                                                                                                                                               |

|         |                                                                                                                                                                                                                                                                                                                                                                                                                                                                                                                                                                                                                                                              |
|---------|--------------------------------------------------------------------------------------------------------------------------------------------------------------------------------------------------------------------------------------------------------------------------------------------------------------------------------------------------------------------------------------------------------------------------------------------------------------------------------------------------------------------------------------------------------------------------------------------------------------------------------------------------------------|
|         | A8701G A8860G A9389G T9540C A9545G C10094T A10398G C10400T T10873C<br>G11719A G11914A C12705T A13263G T14318C C14766T T14783C G15043A<br>G15301A A15326G A15487T T15670C T16126C C16223T T16298C T16311C<br>T16325C C16327T T16519C                                                                                                                                                                                                                                                                                                                                                                                                                          |
| NA20314 | C64T A73G T146C A153G A235G A263G 514delC 515delA A663G A750G<br>A1438G A1736G A1943G A2706G T4248C A4769G A4824G C7028T G8027A<br>G8251A C8794T A8860G G11719A G11914A G12007A C12390T C12705T<br>C14766T A15326G C16111T C16223T C16290T G16319A A16343G T16362C                                                                                                                                                                                                                                                                                                                                                                                           |
| NA20317 | A73G T152C A189G T195C A263G 514delC 515delA A750G T921C A1438G<br>A2706G A4769G G5147A C7028T A7424G T8618C A8701G A8860G T9540C<br>A10398G T10873C G11719A C12705T A13105G T13886C C14284T C14766T<br>G15301A A15326G T15941C T16124C C16223T                                                                                                                                                                                                                                                                                                                                                                                                              |
| NA20322 | A73G T152C C182T G185T T195C G247A A263G A357G 514delC 515delA<br>G709A T710C A750G G769A T825A G1018A T1738C T2352C A2706G G2758A<br>A2768G T2885C T3308C C3594T G3666A G3693A A4104G A4769G A5036G<br>G5046A T5393C T5655C G6480A C6548T T6827C A6989G C7028T A7055G<br>A7146G C7256T T7389C G7521A C7867T A8248G C8468T C8655T A8701G<br>G8790A A8860G T9540C A10398G G10688A T10810C T10873C T11701C<br>G11719A T12519C C12705T A13105G C13506T C13650T T13789C C13880A<br>T14178C A14203G G14560A C14766T A14769G T15115C T15204C A15326G<br>C16114A T16126C C16187T T16189C C16223T C16234T C16239T C16264T<br>C16270T C16278T A16293G T16311C T16519C |
| NA20332 | A73G G143A T146C T152C T195C A263G 310insC C534T A750G G769A G1018A<br>A1438G T2416C A2706G C2789T C3594T A4104G A4769G C7028T T7175C<br>C7256T C7274T A7388G G7521A A7771G G8206A A8701G A8860G A9221G<br>T9540C T10115C A10398G T10873C T11465C G11719A G11914A T11944C<br>T12408C A12693G C12705T C12726T G13590A C13650T A13803G A14566G<br>C14766T G15301A A15326G T15784C A15880G T16189C C16192T C16218T<br>C16223T C16278T C16294T G16390A                                                                                                                                                                                                           |
| NA20334 | C64T A93G G185A A189G T236C G247A A263G 514delC 515delA A750G G769A<br>T825A G1018A C1048T A1438G A2245C A2706G G2758A T2885C C3516A<br>C3594T T3866C A4104G C4312T T4586C A4769G T5096C G5231A T5442C<br>G5460A C5603T T6185C C7028T A7146G C7256T G7521A C8428T C8468T<br>A8566G C8655T A8701G A8860G C9042T A9347G T9540C G9755A C9818T<br>A10398G G10589A C10664T G10688A T10810C T10873C T10915C G11176A<br>A11641G G11719A G11914A G12007A C12705T A12720G A13105G A13276G<br>C13506T C13650T G13759A T14308C C14766T C15136T A15326G G15431A<br>G16129A C16148T C16168T T16172C C16188G T16189C C16223T A16230G<br>T16311C C16320T T16519C            |
| NA20336 | C64T A93G G185A A189G A200G T236C G247A A263G 514delC 515delA A750G<br>G769A T825A G1018A C1048T A1438G A2245C A2706G G2758A T2885C<br>C3516A C3594T T3866C A4104G C4312T T4586C A4769G T5096C G5231A<br>T5442C G5460A C5603T T6185C C7028T A7146G C7256T G7521A C8428T<br>C8468T A8566G C8655T A8701G A8860G C9042T A9347G T9540C G9755A                                                                                                                                                                                                                                                                                                                    |

|         |                                                                                                                                                                                                                                                                                                                                                                                                                                                                                                                                                                                                                              |
|---------|------------------------------------------------------------------------------------------------------------------------------------------------------------------------------------------------------------------------------------------------------------------------------------------------------------------------------------------------------------------------------------------------------------------------------------------------------------------------------------------------------------------------------------------------------------------------------------------------------------------------------|
|         | C9818T A10398G G10589A C10664T G10688A T10810C T10873C T10915C<br>G11176A A11641G G11719A G11914A G12007A C12705T A12720G A13105G<br>A13276G C13506T C13650T T14308C C14766T C15136T A15326G G15431A<br>G16129A C16148T C16168T T16172C C16188G T16189C C16223T A16230G<br>T16311C C16320T T16519C                                                                                                                                                                                                                                                                                                                           |
| NA20339 | A73G T152C A263G A750G T921C A1438G A2706G T2903C A3203G A4769G<br>G5147A A5372G T6680C C7028T A7424G T8618C A8701G A8860G T9111C<br>A9254G T9540C C9728T G9932A A10398G T10873C A11239G G11719A<br>C12705T C12870T A13105G A13542G T13886C C14284T C14766T G15301A<br>A15326G A15496G T16124C A16166G C16223T                                                                                                                                                                                                                                                                                                               |
| NA20340 | A73G T146C T152C T195C A263G 513insC 513insA 513insC 513insA A750G<br>G769A G1018A A1438G T2069C T2416C A2706G C2789T C3594T G3918A<br>A4104G A4769G A5285G T6152C C7028T T7175C C7256T C7274T G7521A<br>A7771G G8206A A8701G A8860G A9221G T9540C T10115C A10398G A10768G<br>T10873C G11719A G11914A T11944C A12693G C12705T A12715G G13590A<br>C13650T A13803G A14566G C14766T A15244G G15301A A15326G C15391T<br>T15629C T15784C T16092C C16223T C16234T C16278T C16294T A16309G<br>T16368C G16390A T16519C                                                                                                               |
| NA20341 | A73G T152C C182T G185T T195C G247A A263G A357G 514delC 515delA<br>G709A T710C A750G G769A T825A G1018A T1738C A1842G T2352C A2706G<br>G2758A A2768G T2885C T3308C C3594T G3666A G3693A A4104G A4769G<br>A5036G G5046A T5393C T5655C C6548T T6827C A6989G C7028T A7055G<br>A7146G C7256T T7389C G7521A C7867T A8248G C8468T C8655T A8701G<br>G8790A A8860G T9540C A10398G G10688A T10810C T10873C G11719A<br>T12519C C12705T A13105G G13194A C13506T C13650T T13789C C13880A<br>T14178C A14203G G14560A C14766T A14769G T15115C A15326G C16114G<br>T16126C C16187T T16189C C16223T C16264T C16270T C16278T A16293G<br>T16311C |
| NA20342 | A73G C150T T152C T195C A263G 310insC A750G A1438G T2352C A2706G<br>A4769G G6179A C7028T A8701G A8860G T9540C A10398G A10819G T10873C<br>G11719A C12705T T14212C C14766T G14905A G15301A A15326G T16172C<br>A16183C T16189C C16223T C16320T T16519C                                                                                                                                                                                                                                                                                                                                                                           |
| NA20344 | A73G C150T T195C A263G 310insC A750G A1438G T2352C T2483C A2706G<br>G3882A A4769G C5210T T5580C G6480A C7028T A8701G A8860G A9377G<br>T9540C A10398G A10819G T10873C G11719A T11722C C12705T T14212C<br>C14766T G14905A G15301A A15326G G16145A T16172C T16189C C16223T<br>C16320T T16519C                                                                                                                                                                                                                                                                                                                                   |
| NA20346 | A73G C150T T195C A263G A750G A1438G T2352C T2483C A2706G G3882A<br>A4769G C5210T T5580C G6480A C7028T A8701G A8860G A9377G T9540C<br>A10398G A10819G T10873C G11719A T11722C C12705T T14212C C14766T<br>G14905A G15301A A15326G G16145A T16172C T16189C C16223T C16320T<br>T16519C                                                                                                                                                                                                                                                                                                                                           |
| NA20348 | A73G C150T T195C A263G A750G A1438G T2352C T2483C A2706G G3882A<br>A4769G C5210T T5580C G6480A C7028T A8701G A8860G A9377G T9540C                                                                                                                                                                                                                                                                                                                                                                                                                                                                                            |



|         |                                                                                                                                                                                                                                                                                                                                                                                                                                                                                                                                                                                                                                                           |
|---------|-----------------------------------------------------------------------------------------------------------------------------------------------------------------------------------------------------------------------------------------------------------------------------------------------------------------------------------------------------------------------------------------------------------------------------------------------------------------------------------------------------------------------------------------------------------------------------------------------------------------------------------------------------------|
|         | A10398G A10819G T10873C G11719A T11722C C12705T T14212C C14766T<br>G14905A G15301A A15326G G16145A T16172C T16189C C16223T C16320T<br>T16519C                                                                                                                                                                                                                                                                                                                                                                                                                                                                                                             |
| NA20351 | A73G G143A T146C T152C T195C C198T A263G A750G G769A G930A G1018A<br>A1438G T2416C A2706G C2789T G3010A T3308C C3594T A4104G A4769G<br>C6164T C6311T A6663G C7028T T7175C C7256T C7274T G7521A A7771G<br>G8206A T8604C A8701G A8860G A9221G T9540C A9629G T10115C A10398G<br>T10873C G11719A G11914A T11944C A12693G C12705T G13590A C13650T<br>A13803G T14180C C14263T A14566G C14766T G15301A A15326G T15784C<br>T16086C C16223T C16278T C16294T A16309G G16390A                                                                                                                                                                                        |
| NA20356 | A73G A263G A750G A1438G A2706G A3348G G3591A A4769G G5261A C7028T<br>G7642A G7805A A8860G G9753C A10978G A11467G G11719A A12308G<br>G12372A G13590A A14179G C14766T A15326G G15927A T16172C A16219G<br>C16278T T16519C                                                                                                                                                                                                                                                                                                                                                                                                                                    |
| NA20357 | A73G T146C T152C T195C A263G A750G G769A G1018A A1438G T2416C<br>A2706G C2789T C3495A C3594T A4104G A4769G C7028T T7175C C7256T<br>C7274T G7521A A7771G G8206A G8541A A8701G G8790A A8860G A9221G<br>T9540C T10115C A10398G T10873C G11719A G11914A T11944C G12630A<br>A12693G C12705T G13590A C13650T A13803G A14566G A14599G C14766T<br>A15244G G15301A A15326G T15784C A16051G C16223T C16278T C16294T<br>A16309G G16390A T16519C                                                                                                                                                                                                                      |
| NA20359 | A73G C182T C186A A189C G247A A263G G316A 514delC 515delA A750G<br>G769A T825A G1018A A1438G 2395delA A2706G G2758A T2885C C3594T<br>G3666A A4104G A4769G A5951G T6071C T6221A T6227C G6260A G6917A<br>C7028T A7146G C7256T T7389C G7498A G7521A G7789A G8027A C8468T<br>C8655T A8701G A8860G A9072G T9540C G9554A G9966A A10398G G10586A<br>G10688A T10810C T10873C C11302T G11719A C12019T G12501A C12705T<br>A12810G A13098G A13105G A13485G C13506T C13650T T13789C T14000A<br>T14178C G14560A C14766T C14911T A15226G A15326G T15905C C15978T<br>G16129A G16145A 16183delA C16184A T16189C A16215G C16223T C16278T<br>C16294T T16311C C16360T T16519C |
| NA20363 | A73G C182T C186A A189C G247A A263G G316A A750G G769A T825A G1018A<br>A1438G 2395delA A2706G G2758A T2885C C3594T G3666A A4104G A4769G<br>A5951G T6071C T6221A T6227C G6260A G6917A C7028T A7146G C7256T<br>T7389C G7498A G7521A G7789A G8027A C8468T C8655T A8701G A8860G<br>A9072G T9540C G9554A G9966A A10398G G10586A G10688A T10810C<br>T10873C C11302T G11719A C12019T G12501A C12705T A12810G A13098G<br>A13105G A13485G C13506T C13650T T13789C T14000A T14178C G14560A<br>C14766T C14911T A15226G A15326G T15905C C15978T G16129A G16145A<br>16183delA C16184A T16189C A16215G C16223T C16278T C16294T T16311C<br>C16360T T16519C                 |
| NA20412 | A73G T152C G185T T195C G247A A263G A357G A750G G769A T825A G1018A<br>T1738C T2352C A2706G G2758A A2768G T2885C T3308C C3594T G3666A<br>G3693A A4104G A4769G A5036G G5046A T5393C T5655C C5988T C6548T                                                                                                                                                                                                                                                                                                                                                                                                                                                     |

|         |                                                                                                                                                                                                                                                                                                                                                                                                                                               |
|---------|-----------------------------------------------------------------------------------------------------------------------------------------------------------------------------------------------------------------------------------------------------------------------------------------------------------------------------------------------------------------------------------------------------------------------------------------------|
|         | T6827C A6881G A6989G C7028T A7055G A7146G C7256T T7389C G7521A C7867T A8248G C8468T C8655T A8701G A8860G T9540C A10398G G10688A T10810C T10873C G11719A T12519C C12705T A13105G C13506T C13650T T13789C C13880A T14178C A14203G G14560A C14766T A14769G T15115C A15326G T16126C G16145A T16189N C16223T C16264T C16270T G16274A C16278TA16293G T16311C T16519C                                                                                |
| NA20414 | A73G G143A T146C T152C T195C A263G A750G G769A G1018A A1438G T2416C A2706G C2789T C3594T A4104G A4769G T5628C C5742N C5743N G5744N G5745N G5746N A5747N A5748N C7028T T7175C C7256T C7274T G7521N A7771G G8206A A8701G A8860G A9221G T9540C T10115C G10143A A10398G T10873C G11719A G11914A T11944C 12237delC A12693G C12705T G13590A C13650T A13803G A14566G C14766T G15301A A15326G T15784C C16214T C16223T C16278T C16294T A16309G G16390A |
| NA20502 | A263G A750G A942G A1438G T2205C T3535C A4769G T7270C A8860G A11344G A15326G T16519C A16524C                                                                                                                                                                                                                                                                                                                                                   |
| NA20503 | A73G G143A A189G C194T T195C T196C T204C G207A A263G 310insC G709A A750G T1243C A1438G A2706G A3505G A4769G G5046A G5147A G5460A C7028T G8251A A8860G G8994A T10410C C11674T G11719A T12414C C12705T C14766T A15326G G15884C C16187T C16223T T16249C C16287T C16292T T16519C                                                                                                                                                                  |
| NA20504 | A263G A750G A1438G G3010A G3715N A4769G C5345T G5460A T7258C A8860G A15326G A15817G T16519C                                                                                                                                                                                                                                                                                                                                                   |
| NA20505 | A73G A263G C497T A750G T1189C A1438G A1811G A2706G A3480G A4769G C7028T A8291G A8860G G9055A T9698C G9932A A10398G A10550G T11299C A11467G A11470G G11719A G11914A A12308G G12372A C14167T C14766T T14798C G15047A A15326G A15924G T16224C T16311C T16519C                                                                                                                                                                                    |
| NA20506 | A263G A750G A1438G C1601T A2706G A4769G G5417A C7028T T8143C A8860G G12940A T14180N A15326G T16311C                                                                                                                                                                                                                                                                                                                                           |
| NA20507 | A73G A263G 310insC T334C G709A A750G G930A A1438G G1888A A2706G T4216C A4769G A4917G G5147A C7028T G8697A A8860G A9180G G9966A T10463C A11251G G11440A G11719A A11812G G13368A A14233G C14766T G14905A A15326G C15452A A15607G G15928A T16126C C16292T C16294T C16296T T16304C T16519C                                                                                                                                                        |
| NA20508 | A73G C151T T195C A263G G709A A750G G930A A1438G G1888A A2706G T4216C A4769G A4917G G5147A C5151T C7028T G8697A A8860G G9380A A10188G T10463C A10750G G11016A A11251G G11719A A11812G G13368A A14233G C14766T G14905A A15326G C15452A A15607G A15758G G15928A T16126C C16187T C16256T C16294T C16296T T16304C T16519C                                                                                                                          |
| NA20509 | A263G T310C A750G A1438G G3010A A3796G T3826C A4769G A8860G G15152A A15326G T15932C A16182C A16183C T16189C C16261T G16274A T16356C T16519C                                                                                                                                                                                                                                                                                                   |
| NA20510 | A73G A189G T195C T204C G207A A263G G709A A750G T1243C A1438G A2706G A3505G A4093G A4769G G5046A G5460A C7028T G8251A T8614C A8860G G8994A C11674T G11719A A11947G T12414C C12705T C14766T                                                                                                                                                                                                                                                     |

|         |                                                                                                                                                                                                                                                                                                                     |
|---------|---------------------------------------------------------------------------------------------------------------------------------------------------------------------------------------------------------------------------------------------------------------------------------------------------------------------|
|         | A15326G G15884C C16192T C16223T A16309G T16325C T16519C                                                                                                                                                                                                                                                             |
| NA20511 | T146C T152C A263G 310insC A750G A1438G C2881T A4769G T7094C T7645C<br>A8860G T10101C A10217G A12972G G14945A A15326G C16223T C16256T<br>T16352C A16399G                                                                                                                                                             |
| NA20512 | A73G T195C A263G T310C G499A A750G A1438G A1811G A2706G T4646C<br>A4769G T5999C A6047G C7028T C8818T A8860G C11332T A11467G G11719A<br>A12308G G12372A C14620T C14766T A15326G T15693C C16223T T16356C<br>T16519C                                                                                                   |
| NA20513 | G75A A263G 310insC T453C A750G A1438G G3010A A4769G G5460A A7436G<br>T8023C A8512G A8860G T9148C G13590A A15326G T15454C A16309G<br>T16519C                                                                                                                                                                         |
| NA20514 | G75A A263G T453C A750G A1438G G3010A A4769G G5460A A7436G T8023C<br>A8512G A8860G T9148C G13590A A15326G T15454C A16309G T16519C                                                                                                                                                                                    |
| NA20515 | A73G A263G A750G A1438G A2706G T3197C T4553C A4769G C7028T A8860G<br>G9477A A9667G A11467G G11719A A12308G G12372A T13617C A13966G<br>C14766T A14793G A15218G A15326G A16163G C16192T T16209C C16256T<br>C16270T C16291T A16399G                                                                                    |
| NA20516 | T239C A263G A750G T1420C A1438G G3915A A4727G A4769G A5665G<br>A8860G G9380A G10589A T10908A C13653T C13947T A15326G T16249C<br>T16362C A16482G                                                                                                                                                                     |
| NA20517 | A73G C150T A263G A750G A1438G C1721T A2370G A2706G T3197C A4732G<br>A4769G G6899A C7028T A7768G T8772C A8860G G9477A T10031C A11467G<br>G11719A A12308G G12372A T13617C A13637G T14182C C14766T A15326G<br>T15519C T16189C C16192T C16270T T16304C                                                                  |
| NA20518 | A73G C150T T152C T195C A215G A263G C295T T319C T489C G513A 514delC<br>515delA A750G A1438G A2706G T4216C A4769G C7028T C7476T G7789A<br>A8860G G9612A A10398G A10499G A11251G G11377A G11719A A12612G<br>G13708A A13722G A14133G C14766T G15257A A15326G C15452A C16069T<br>T16126C G16145A T16189C T16231C C16261T |
| NA20519 | A263G C456T A750G A1438G A4769G G4820A A8860G A10289G A15326G<br>T16304C                                                                                                                                                                                                                                            |
| NA20520 | T152C A263G A750G A1438G A4769G T6776C T8602C A8860G A14687G<br>A15326G T16519C                                                                                                                                                                                                                                     |
| NA20521 | A73G T146C T195C A263G 310insC A750G A1438G A4769G A7930T A8860G<br>A8946G A10771G A15326G T16519C                                                                                                                                                                                                                  |
| NA20522 | A73G A263G C497T A750G T1189C A1438G A1811G A2706G A3480G C4748T<br>A4769G G5773A C7028T A8860G G9055A T9698C A10398G A10550G T11025C<br>T11299C A11467G G11719A A12308G G12372A G13368A C14167T C14766T<br>T14798C A15326G A16183C T16189C T16224C T16311C T16519C                                                 |
| NA20524 | A73G A263G T489C A750G A1438G A2706G G3010A A4769G C4883T C5178A<br>C7028T A7073G A7353G C8273T C8414T A8701G A8860G T9540C A10398G<br>C10400T T10873C G11696A G11719A C12705T C14668T C14766T T14783C<br>G15043A G15301A A15326G T15470C C16223T T16362C                                                           |
| NA20525 | A263G A750G A1438G G1719A G3010A A4769G A7202G A8673G A8860G                                                                                                                                                                                                                                                        |

|         |                                                                                                                                                                                                                                                                                                                 |
|---------|-----------------------------------------------------------------------------------------------------------------------------------------------------------------------------------------------------------------------------------------------------------------------------------------------------------------|
|         | A14133G A15326G A16316G T16519C                                                                                                                                                                                                                                                                                 |
| NA20526 | A263G A750G A1438G G3010A A3796G A4769G A8860G A11923G G13552A<br>A15326G T16189C T16356C T16519C                                                                                                                                                                                                               |
| NA20527 | A263G G709A A750G A1438G A4769G T5785C A8860G T9497C A15326G<br>T16368C T16519C                                                                                                                                                                                                                                 |
| NA20528 | A73G G185A A263G C295T C462T T489C A750G A1438G A2706G G3010A<br>T3847C T4216C A4769G A5836G C7028T T8567C A8860G A10398G A11251G<br>G11719A A12612G G13708A C14766T T14798C A15326G C15452A C16069T<br>C16111A T16126C C16292T                                                                                 |
| NA20529 | A73G T152C A263G G709A A750G A1438G G1888A A2706G T4216C A4769G<br>A4917G C7028T T8310C G8697A A8860G T10463C A10750G A11251G G11719A<br>A11812G T11944C G13368A A14233G C14766T G14905A A15326G C15452A<br>A15607G G15928A T16126C C16294T T16519C                                                             |
| NA20530 | A73G A263G C497T A750G T1189C A1438G A1811G A2706G A3480G A4769G<br>C5264T C7028T A8860G G9055A T9698C A10398G A10550G T11299C A11467G<br>T11485C G11719A T12173C A12308G G12372A A12612G A13098G G13359A<br>G13708A A13827G C14167T C14766T T14798C A15326G T16224C A16246T<br>T16311C T16519C                 |
| NA20531 | A263G A750G A1438G G3010A A4769G G5460A A8860G A15326G A15817G<br>T16519C                                                                                                                                                                                                                                       |
| NA20532 | T72C T152C A263G A750G A1438G A2706G G4580A A4769G C7028T A8860G<br>T12563N G15148A A15326G C15904T T16298C                                                                                                                                                                                                     |
| NA20533 | A263G C456T A750G A1438G A4769G G5471A A8860G A15326G T16304C                                                                                                                                                                                                                                                   |
| NA20534 | A73G T146C C194T C242T A263G C295T C462T T489C A735G A750G A1438G<br>T2158C A2706G G3010A T4216C A4769G C5191T G5460A G6899A C7028T<br>G7211A G8269A A8331G G8557A A8860G A10398G A11251G G11719A<br>G12007A A12612G G13708A T13879C C14766T G15314A A15326G A15442G<br>C15452A C16069T T16126C G16145A C16261T |
| NA20535 | A73G A263G A750G A1438G G3010A A4769G A8860G A15326G A16162G<br>T16519C                                                                                                                                                                                                                                         |
| NA20536 | A73G T195C T204C G207A A263G T310N A750G A1438G G1719A A2706G<br>A4769G A5186G A5558G T6221C C6371T T6626C A6791G C7028T T8503C<br>A8860G T10084C T11465C G11719A T11878C C12705T G13708A A13966G<br>T14178C T14470C C14766T A15326G A16183C T16189C C16223T C16278T<br>T16519C                                 |
| NA20537 | A263G A750G A1438G A4769G A4793G C6296A G8020A A8860G A15326G<br>A16265C T16311C T16519C                                                                                                                                                                                                                        |
| NA20538 | T195C A263G A374G 514delC 515delA A750G A1438G A4769G A8860G<br>G12561A T15071N A15326G A16220G T16519C                                                                                                                                                                                                         |
| NA20539 | A73G C114T A200G A263G C497T A750G T1189C A1438G A1811G A2706G<br>A3480G A4769G C7028T A8860G G9055A T9698C A10398G A10550G T11299C<br>A11467G A11470G G11719A G11914A A12308G G12372A C14167T C14766T<br>T14798C A15326G A15924G T16224C T16311C T16519C                                                       |
| NA20540 | A73G T146C C150T A263G A750G A1438G A2706G T3197C A4769G A5656G                                                                                                                                                                                                                                                 |

|         |                                                                                                                                                                                                                                                                                                                                                                                                            |
|---------|------------------------------------------------------------------------------------------------------------------------------------------------------------------------------------------------------------------------------------------------------------------------------------------------------------------------------------------------------------------------------------------------------------|
|         | C7028T A7768G A8860G G9477A A11467G G11719A A12308G G12372A<br>T13617C T14182C C14766T A15326G G16129A A16183C T16189C C16270T<br>T16519C                                                                                                                                                                                                                                                                  |
| NA20541 | A263G A750G A1438G G3010A A4769G A8860G C11956T A15326G G16153A<br>T16519C                                                                                                                                                                                                                                                                                                                                 |
| NA20542 | A73G A263G G709A A750G A1438G G1888A A2706G T4216C C4739T A4769G<br>A4917G C7028T G8697A A8730G A8860G A9254G T10463C A11251G G11719A<br>C12633A G13368A C14766T G14905A A15326G C15452A A15607G G15928A<br>T16126C A16163G T16189C T16243C C16294T T16519C                                                                                                                                                |
| NA20543 | A263G A750G A1438G G3010A T3826C A4769G G5460A G8251A A8860G<br>A15326G A15936G T16093C C16148T T16172C C16174T C16201T T16519C                                                                                                                                                                                                                                                                            |
| NA20544 | A73G T152C G185A A188G G228A A263G C295T C462T T489C A750G A1438G<br>A2706G G3010A T4216C A4769G C7028T A8860G A10398G A11251G G11719A<br>A12612G T12879C G13204A G13708A C14130T C14766T T14798C A15326G<br>C15452A C16069T T16126C T16519C                                                                                                                                                               |
| NA20581 | A73G T152C A263G 310insC A384G G709A A750G A1438G G1888A A2706G<br>T4216C A4769G A4917G G4959A A5558G C7028T G7853A G8697A A8860G<br>G9300A T10463C A11251G G11719A C12633A G13368A C14766T G14905A<br>A15326G C15452A A15607G G15928A T16126C A16163G C16186T T16189C<br>C16261T C16294T T16519C                                                                                                          |
| NA20582 | A153G A263G A750G A1438G A4769G A8860G C11788T A15326G G15431A<br>T16519C                                                                                                                                                                                                                                                                                                                                  |
| NA20585 | T152C A263G A750G A4769G T8598C A8860G G11440A A15326G T16209C<br>T16311C                                                                                                                                                                                                                                                                                                                                  |
| NA20586 | A263G A750G A1438G G3010A A4769G A8860G T13015C A15326G C16192T<br>C16270T T16519C                                                                                                                                                                                                                                                                                                                         |
| NA20587 | A263G 310insC A750G A1438G A2706G A4769G C7028T A8860N A15326G<br>T16311C                                                                                                                                                                                                                                                                                                                                  |
| NA20588 | A263G A750G A1438G G3010A C3874T A4769G A8860G A9181G C10211T<br>A15326G T16519C                                                                                                                                                                                                                                                                                                                           |
| NA20589 | T40C C41T A73G C150T A263G G709A A750G A1438G G1888A A2706G T4216C<br>A4769G A4917G C7028T G8697A A8860G T10463C A11251G G11719A A11812G<br>G13368A A14233G C14766T G14905A A15326G C15452A A15607G G15928A<br>T16126C G16153A C16294T T16519C                                                                                                                                                             |
| NA20752 | A73G C150T T195C A263G C295T C456T T489C A750G A1438G A2706G<br>T4216C A4769G T6671C C7028T C7476T A8860G A10398G A10499G A11002G<br>A11251G G11377A G11719A A12570G A12612G T13015C G13708A T13830C<br>C14766T G15257A A15326G C15452A A15679G C16069T T16126C A16241G                                                                                                                                    |
| NA20753 | A73G T152C C182T G185T T195C G247A A263G A357G G709A T710C A750G<br>G769A T825A G1018A T1738C T2352C A2706G G2758A A2768G T2885C<br>T3308C C3594T G3666A G3693A A4104G A4769G A5036G G5046A T5393C<br>T5655C C6548T T6827C A6989G C7028T A7055G A7146G C7256T T7389C<br>G7521A C7867T A8248G C8468T C8655T A8701G A8860G T9540C A10398G<br>G10688A T10810C T10873C G11719A T12519C C12705T A13105G C13506T |

|         |                                                                                                                                                                                                                                                                                                                  |
|---------|------------------------------------------------------------------------------------------------------------------------------------------------------------------------------------------------------------------------------------------------------------------------------------------------------------------|
|         | C13650T T13789C C13880A T14178C A14203G G14560A C14766T A14769G<br>C14812T T15115C A15326G T16126C C16187T T16189C C16223T C16264T<br>C16270T C16278T A16293G T16311C T16519C                                                                                                                                    |
| NA20754 | T152C A263G A750G A1438G G1888A T3197C T4248C A4769G T7645C A8860G<br>A10217G T13617C A15326G G15553A A15924G C16354T                                                                                                                                                                                            |
| NA20755 | A93G A263G A750G A1438G A4769G A8860G A10136G A10190G G13708A<br>G14364A A15326G T16519C                                                                                                                                                                                                                         |
| NA20756 | A73G T146C T152C G207A A263G G709A A750G A1438G A1811G A2706G<br>A3480G T4561C A4769G C7028T A8860G A9007N G9055A T9698C T9716C<br>A10550G T11299C A11467G G11719A A12308G G12372A C14167T C14766T<br>T14798C A15326G T15718C T16224C T16311C T16519C                                                            |
| NA20757 | A73G T152C A263G G709A A750G A1438G G1888A A2706G T4216C A4769G<br>A4917G C7028T G7853A C8059T G8697A A8860G T10463C A11251G G11719A<br>C12633A G13368A T13879C C14766T G14905A A15326G C15452A A15607G<br>G15928A T16126C A16163G C16169T C16186T T16189C C16294T T16519C                                       |
| NA20758 | A73G T146C T152C A263G T279C G709A A750G A1438G G1888A A2706G<br>T4216C A4769G A4917G C5187T G6261A C7028T C7873T G8697A A8860G<br>T10463C C10822T A11251G G11719A A11812G G13368A A14233G C14766T<br>G14905A A14977G A15326G C15452A A15607G G15928A T16126C C16256T<br>C16292T C16294T T16311C T16519C         |
| NA20759 | A73G T152C A263G C497T A750G C770T T1189C A1438G A1811G A2706G<br>A3480G T3777C A4769G C7028T T7278C A7729G A8860G G9055A T9698C<br>T9800C A10398G A10550G A11053G T11299C A11467G G11719A G11914A<br>A12308G G12372A T13326C C14167T C14766T T14798C A15326G A15758G<br>A15924G T16093C T16224C T16311C T16519C |
| NA20760 | A73G G207A A263G A750G A1438G A2706G T3197C T3504C A4769G C7028T<br>C7471T A8860G G9477A G9548A A11467G G11719A A12308G G12372A<br>A12855G T13617C C14766T A14793G A15326G C16192T C16256T C16270T<br>G16526A                                                                                                    |
| NA20761 | A263G A750G A1438G A4769G T5108C T6137C T6971C A8860G A12654G<br>A15326G T15747C G15928T T16093C T16519C                                                                                                                                                                                                         |
| NA20762 | A73G A189G C194T T195C T204C A263G 310insC G709A A750G C868T T1193C<br>T1243C A1438G A2706G A3505G T4363C A4769G G5046A G5460A C6528T<br>C7028T G8251A A8860G G8994A A10097G T10410C C11674T G11719A<br>A11947G T12414C C12705T C14766T A15326G A15775G G15884C C16192T<br>C16223T C16292T T16362C T16519C       |
| NA20764 | A73G T195C A263G C309N T310C C497T A750G T1189C A1438G A1811G<br>A2706G A3480G A4769G C7028T A8860N G9055A T9698C A10398G A10550G<br>T11299C A11467G G11719A C12063T A12308G G12372A C14167T C14766T<br>T14798C A15326G T16093C T16224C T16311C T16519C                                                          |
| NA20765 | A73G T152C A263G A750G A1438G A2706G T3197C A4769G C7028T 8281delC<br>8282delC 8283delC 8284delC 8285delC 8286delT 8287delC 8288delT 8289delA<br>A8860G G9477A G9548A G10685A A11467G G11719A T11984C T12128C<br>G12372A A12654G A13285G T13617C C14766T A14793G A15326G C16192T                                 |

|         |                                                                                                                                                                                                                                                                                                              |
|---------|--------------------------------------------------------------------------------------------------------------------------------------------------------------------------------------------------------------------------------------------------------------------------------------------------------------|
|         | C16256T C16270T G16526A                                                                                                                                                                                                                                                                                      |
| NA20766 | A263G A750G A1438G C3637T A4295G A4769G A8188G A8860G T13781C<br>A15326G T16311C T16519C                                                                                                                                                                                                                     |
| NA20768 | A73G A263G A750G A1438G G3010A A4769G C8468T A8860G A14978G<br>A15326G A16051G A16162G T16209C C16259T T16519C                                                                                                                                                                                               |
| NA20769 | A263G A750G A1438G G3010A A4769G A8860G T13015C A15326G C16192T<br>C16270T T16519C                                                                                                                                                                                                                           |
| NA20770 | A73G A263G 310insC G709A A750G A1438G G1888A A2706G G4113A T4216C<br>A4769G A4917G G5471A C6445T C7028T G8697A A8860G A9210G T9615C<br>T10463C A11251G G11719A A11812G T12408C T13260C G13368A A14233G<br>G14323A A14605G C14766T G14905A A15326G C15452A A15607G G15928A<br>T16126C C16294T C16296T T16519C |
| NA20771 | A200G A263G A750G A1438G C4107T A4769G A7403G A8860G G11440A<br>T11485C C14872T A15326G C16261T C16291T T16519C                                                                                                                                                                                              |
| NA20772 | A191C A263G A750G A1438G G1709A A4769G A4793G A8860G A10398G<br>T11204C A14890G A15326G T16519C                                                                                                                                                                                                              |
| NA20773 | A111G T152C T195C A263G A750G 956delC A1438G A4769G A8860G G14198A<br>A15326G T16209C C16261T                                                                                                                                                                                                                |
| NA20774 | A73G A263G A750G A1438G A2706G T3197C T4553C A4769G C7028T A8860G<br>G9477A A9667G A11467G G11719A A12308G G12372A T13617C C14766T<br>A14793G A15218G A15326G T16086C C16192T C16256T C16270T C16291T<br>A16399G                                                                                             |
| NA20775 | A73G A263G T334C G709A A750G G930A A1438G G1888A A2706G T4216C<br>A4769G A4917G G5147A C7028T G8697A A8860G A9180G G9966A T10463C<br>A11251G G11440A G11719A A11812G G13368A A14233G C14766T G14905A<br>A15326G C15452A A15607G G15928A T16126C C16292T C16294T C16296T<br>T16304C T16519C                   |
| NA20778 | A73G T146C C151T T152C T195C A263G A750G T980C A1438G A1811G<br>T2442C A2706G C3741T A4769G C5360T T6221C C7028T A7746G C8137T<br>C8684T A8860G C10142T A11467G G11719A A12308G G12372A T13500C<br>G14569A C14766T A15326G T16126C C16148T C16150T A16309G A16318C<br>T16519C                                |
| NA20780 | A73G T239C A263G 310insC T477C A750G A1438G G3915A A4727G A4769G<br>A8860G G9380A G10589A A15326G T16362C A16482G                                                                                                                                                                                            |
| NA20783 | A73G A263G G709A A750G A1438G G1888A A2706G T4216C A4769G A4917G<br>C5817T G6261A C7028T C8455T G8697A A8860G T10463C C10822T A11251G<br>G11719A A11812G G13368A A13973T A14233G C14766T G14905A T15287C<br>A15326G C15452A A15607G G15928A T16126C C16292T C16294T G16390A<br>T16519C                       |
| NA20785 | A73G G185A G228A A263G C295T C462T T489C A750G A1438G A2706G<br>G3010A T4216C A4769G C7028T A8860G G8865A A10398G A11251G G11719A<br>A12612G G13708A C13934T C14766T T14798C A15326G C15452A C16069T<br>T16126C T16249C C16261T G16390A                                                                      |
| NA20786 | A73G A189G T195C A263G A750G A1438G A2706G A3480G A4769G C5165T                                                                                                                                                                                                                                              |

|         |                                                                                                                                                                                                                                                                        |
|---------|------------------------------------------------------------------------------------------------------------------------------------------------------------------------------------------------------------------------------------------------------------------------|
|         | C7028T A8860G G9055A T9698C A10236G A11467G G11719A A12308G G12372A A14053G C14167T C14766T A15326G A16183C T16189C C16234T T16324C T16519C                                                                                                                            |
| NA20787 | A73G A263G C295T C462T T482C T489C A750G A1438G A2706G G3010A T3394C T4216C A4769G G6951A C7028T A8860G G9192A A10398G C11177T A11251G G11719A A12612G G13708A C14766T T14798C A15326G C15452A C16069T T16126C C16169T                                                 |
| NA20790 | T152C A263G A750G A1438G G3010A A4769G T4859C A8860G A15326G C16188G T16519C                                                                                                                                                                                           |
| NA20792 | A263G A750G A1438G G3010A A3796G A4769G T7657N A8860G A11923G G13552A A15326G T16189C T16356C T16519C                                                                                                                                                                  |
| NA20795 | T146C T152C A263G G709A A750G A1438G A4769G G5262A A8860G A10562G T11152C C14745T A15326G T16519C                                                                                                                                                                      |
| NA20796 | A263G A750G A1438G G1709A A4769G A4793G A8860G A10398G T11204C A14890G A15326G T16519C                                                                                                                                                                                 |
| NA20797 | C64T T72C A263G A750G A1438G A2706G G4580A A4769G C7028T A8860G A13105G A13527G A15326G C15904T T16298C                                                                                                                                                                |
| NA20798 | T55C T57C A263G 310insC A750G A1438G T3847C A4769G T6253C T7572C A8860G A15326G A15715G                                                                                                                                                                                |
| NA20799 | A73G A263G C456T A750G A1438G A4769G A5566G A7474G A8343G A8860G G12771A A15326G C16294T T16304C                                                                                                                                                                       |
| NA20800 | T195C A263G A335G A750G A1438G A4769G A8860G A15326G A16265C T16519C                                                                                                                                                                                                   |
| NA20801 | A263G A750G A1438G A2706G T3398C A3547G A4769G G6023A C7028T A7353G A8014T A8860G T12696C G13368A A15218G A15326G C16067T T16519C                                                                                                                                      |
| NA20802 | A73G T152C A263G A750G A1438G A4769G T6632C T7861C A8860G G14364A A15326G A16219G C16242N T16325C T16519C                                                                                                                                                              |
| NA20803 | A189G A263G A750G A1438G G3010A T3548C A4769G G5460A A8860G A15326G A15817G G16244A T16519C                                                                                                                                                                            |
| NA20804 | A73G A189G C194T T195C T204C G207A A263G 567insC G709A A750G T1243C A1438G A2706G A3505G A4093G A4769G G5046A G5460A C7028T G8251A T8610C T8614C A8860G G8994A C11674T G11719A A11947G T12414C C12705T C14766T A15326G G15884C C16192T C16223T C16292T T16325C T16519C |
| NA20805 | A73G A263G A750G A1438G A2706G T3197C A4769G C7028T T7692C C7792T A8860G G8865A G9477A A11467G T11485C G11719A A12308G G12372A G12406A T13617C C14766T A14793G A15218G A15326G C16256T C16270T A16399G                                                                 |
| NA20806 | A200G A263G A750G A1438G C4086T C4107T A4769G A7403G A8860G G11440A T11485C A14118G C14872T A15326G T15804C C16261T C16291T T16519C                                                                                                                                    |
| NA20807 | A73G T152C T217C A263G A508G A750G A1438G A1811G A2706G A3720G A3865G G4491A A4769G A5390G T5426C C6045T T6152C C7028T A8860G A10876G G11016A A11467G G11719A A12308G G12372A T13020C T13734C                                                                          |



|         |                                                                                                                                                                                                                                                                                            |
|---------|--------------------------------------------------------------------------------------------------------------------------------------------------------------------------------------------------------------------------------------------------------------------------------------------|
|         | C14766T A15326G T15454C A15907G A16051G G16129C C16179T A16182C A16183C T16189C T16362C T16519C                                                                                                                                                                                            |
| NA20808 | T204C A263G A750G A1438G A4769G A8860G G10646A A15326G A16183C T16189C C16320T T16519C                                                                                                                                                                                                     |
| NA20809 | A263G 310insC A750G A1438G G1719A A4769G G4924A T6776C A8860G A15326G T16519C                                                                                                                                                                                                              |
| NA20810 | G185A A263G A281G A750G A1438G T2863C G3010A A3771G A4769G G5460A A8860G A15326G T15747C T16092C C16264T G16319A T16519C                                                                                                                                                                   |
| NA20811 | A263G A750G A1438G G3010A A4769G T4859C G8856A A8860G G14258A A15326G A16037G T16189C T16519C                                                                                                                                                                                              |
| NA20812 | A73G T152C A263G A750G A1438G T1700C A2706G T3197C A4722G A4769G T5495C C7028T A8860G A9007G G9477A A11467G G11719A A12308G G12372A T13617C C14766T A14793G G15110A A15218G A15326G A15924G C16256T C16270T A16399G                                                                        |
| NA20813 | A73G A263G 310insC C497T A750G T1189C A1438G A1811G T2628C A2706G A3480G A4769G C7028T A8860G G9055A T9698C A10398G A10550G T11299C A11467G A11470G G11719A G11914A A12308G G12372A T13443C C14167T C14766T T14798C A15326G A15924G T16093C T16224C T16311C T16519C                        |
| NA20814 | A263G A750G A1438G A2706G A4769G A5372G T6248C C7028T A8860G G8994A T9096C A15326G C16286T                                                                                                                                                                                                 |
| NA20815 | A263G 310insC A750G A1438G A4769G T5442C A8860G G9932A C14149T A15326G T16519C                                                                                                                                                                                                             |
| NA20816 | A263G 514delC 515delA A750G 956delC A1438G C3992T A4024G A4769G T5004C G5147A G5471A A8860G G9123A C14365T A14582G A15326G C16176G                                                                                                                                                         |
| NA20818 | A73G T152C A263G C295T C462T T489C A750G A1438G A2706G G3010A T4216C A4769G C7028T G7789A A7963G A8860G A9041G A10398G A11251G G11719A A12612G G13708A C14766T A15326G C15452A C16069T T16126C G16129A C16148T C16193T T16519C                                                             |
| NA20819 | A73G T204C A263G 455insT G709A A750G A1438G G1888A A2706G T4216C A4769G A4917G C6053T C7028T G8697A A8860G T10463C A11251G G11719A C12633A G13368A A13470G C14766T G14905A A15326G C15452A A15607G G15928A T16126C A16163G C16186T T16189C C16294T T16519C                                 |
| NA20826 | A73G A263G C285T A750G A1438G C2218T A2706G A4769G G4991A G6026A C6041T T6293C C7028T A7253G T7581C A8860G A11467G G11719A A12308G G12372A T12879C A13104G A14070G G14364A C14766T G15106A T15115C G15148A G15217A A15326G A15746G A15954C A16182C A16183C T16189C T16249C                 |
| NA20828 | A73G A263G C497T A750G T1189C A1438G A1811G A2706G A3480G A4769G G6465A C7028T A7118G A8860G G9055A T9698C A10398G A10550G T11299C A11467G T11485C G11719A A12017G A12308G G12372A G13708A C14167T A14181G G14569A C14766T T14798C A15326G G16129A A16177G T16224C T16311C G16390A T16519C |

Sites are according to rCRS. del means deletion and ins means insertion. Others represent substitutions.

**Figure S1 Non-metric multidimensional scaling of mtDNA  $\Phi_{ST}$  distances**

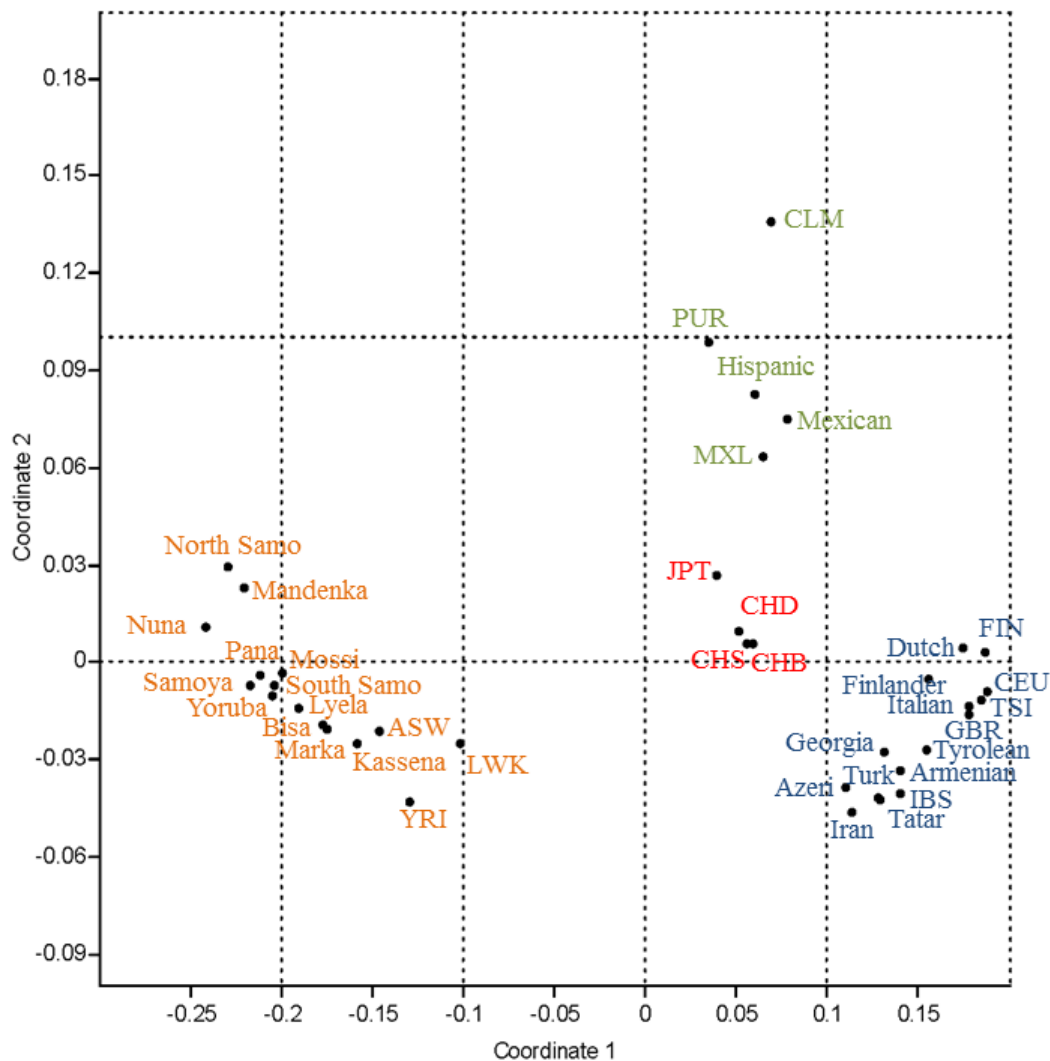

YRI, LWK, ASW, FIN, CEU, TSI, GBR, IBS, MXL, PUR, CLM were from current study. Previous reported data were CHB, CHD, CHS, JPT<sup>1</sup>, North Samo, South Samo, Mandenka, Nuna, Pana, Mossi, Samoya, Yoruba, Bisa, Lyela, Marka, Kassena<sup>2</sup>, Finlander<sup>3</sup>, Azeri, Iran, Turk, Georgia, Armenian<sup>4</sup>, Tatar<sup>5</sup>, South Tyrolean<sup>6</sup>, Italian<sup>7</sup>, Dutch<sup>8</sup>, Hispanic individuals<sup>9</sup> and Mexians<sup>10</sup>. Orange, Africans; Red, East Asians; Green, Americas; Blue, Europeans and the Middle Easterners.

#### Reference

- 1 Zheng, H. X. *et al.* Major population expansion of East Asians began before Neolithic Time: Evidence of mtDNA genomes. *PLoS One* **6**, e25835 (2011).
- 2 Barbieri, C. *et al.* Contrasting maternal and paternal histories in the linguistic context of Burkina Faso. *Mol Biol Evol* **29**, 1213-1223. (2012).
- 3 Finnila, S., Lehtonen, M. S. & Majamaa, K. Phylogenetic network for European mtDNA.

- Am. J. Hum. Genet.* **68**, 1475-1484 (2001).
- 4 Schönberg, A., Theunert, C., Li, M., Stoneking, M. & Nasidze, I. High-throughput sequencing of complete human mtDNA genomes from the Caucasus and West Asia: high diversity and demographic inferences. *Eur J Hum Genet* **19**, 988-994 (2011).
- 5 Malyarchuk, B., Derenko, M., Denisova, G. & Kravtsova, O. Mitogenomic diversity in Tatars from the Volga-Ural Region of Russia. *Mol. Biol. Evol.* **27**, 2220-2226 (2010).
- 6 Pichler, I. *et al.* Drawing the history of the Hutterite population on a genetic landscape: inference from Y-chromosome and mtDNA genotypes. *Eur J Hum Genet* **18**, 463-470 (2010).
- 7 Gasparre, G. *et al.* Disruptive mitochondrial DNA mutations in complex I subunits are markers of oncocytic phenotype in thyroid tumors. *Proc. Natl. Acad. Sci. U. S. A.* **104**, 9001-9006 (2007).
- 8 Howell, N. *et al.* Sequence analysis of the mitochondrial genomes from Dutch pedigrees with Leber hereditary optic neuropathy. *Am J Hum Genet* **72**, 1460-1469 (2003).
- 9 Just, R. S., Diegoli, T. M., Saunier, J. L., Irwin, J. A. & Parsons, T. J. Complete mitochondrial genome sequences for 265 African American and U.S. "Hispanic" individuals. *Forensic Sci Int Genet* **2**, e45-48 (2008).
- 10 Kumar, S. *et al.* Large scale mitochondrial sequencing in Mexican Americans suggests a reappraisal of Native American origins. *Bmc Evol Biol* **11**, 293 (2011).
